# Supplementary material for: Design, synthesis, molecular docking, and dynamics studies of novel thiazole-Schiff base derivatives containing a fluorene moiety and the assessment of their antimicrobial and antioxidant activity
Source: Royal Society of Chemistry journal article supplement (doi:10.1039/d4ra04197f), 2024-01-01
Supplement: d4ra04197f1.pdf [file d4ra04197f1.pdf]

Design, synthesis, molecular docking, and dynamics studies of novel thiazole-Schiff base derivatives containing fluorene moiety with the assessment of their antimicrobial and antioxidant activity

Sumita Saznin Marufa,<sup>a</sup> Tasnim Rahman,<sup>a</sup> Mohammad Mostafizur Rahman,<sup>\*\*a</sup> Md. Mizanur Rahman,<sup>a</sup> Samira Jarin Khan,<sup>a</sup> Rownok Jahan,<sup>a</sup> Hiroshi Nishino,<sup>b</sup> Mohammad Sayed Alam,<sup>\*a</sup> Md. Aminul Haque,<sup>\*\*\*a</sup>

<sup>a</sup>Department of Chemistry, Jagannath University, Dhaka 1100, Bangladesh

<sup>a</sup>Department of Chemistry, Graduate School of Science and Technology, Kumamoto University, Kumamoto, Japan

\*\* Corresponding author.

E-mail address: [mostafiz@chem.jnu.ac.bd](mailto:mostafiz@chem.jnu.ac.bd) (M.M. Rahman).

\* Corresponding author.

E-mail address: [msalam@chem.jnu.ac.bd](mailto:msalam@chem.jnu.ac.bd) (M.S. Alam).

\*\*\* Corresponding author.

E-mail address: [amin2k12@chem.jnu.ac.bd](mailto:amin2k12@chem.jnu.ac.bd) (M.A. Haque).

## ORCID

Md. Aminul Haque. <https://orcid.org/0000-0001-5514-1597>

## Contents

1. IR, <sup>1</sup>H NMR, and HRMS spectra of compounds **1a**, **2a-2r**.
2. Concentration-inhibition curve to determine IC<sub>50</sub> values of **2a-2r** and ascorbic acid.

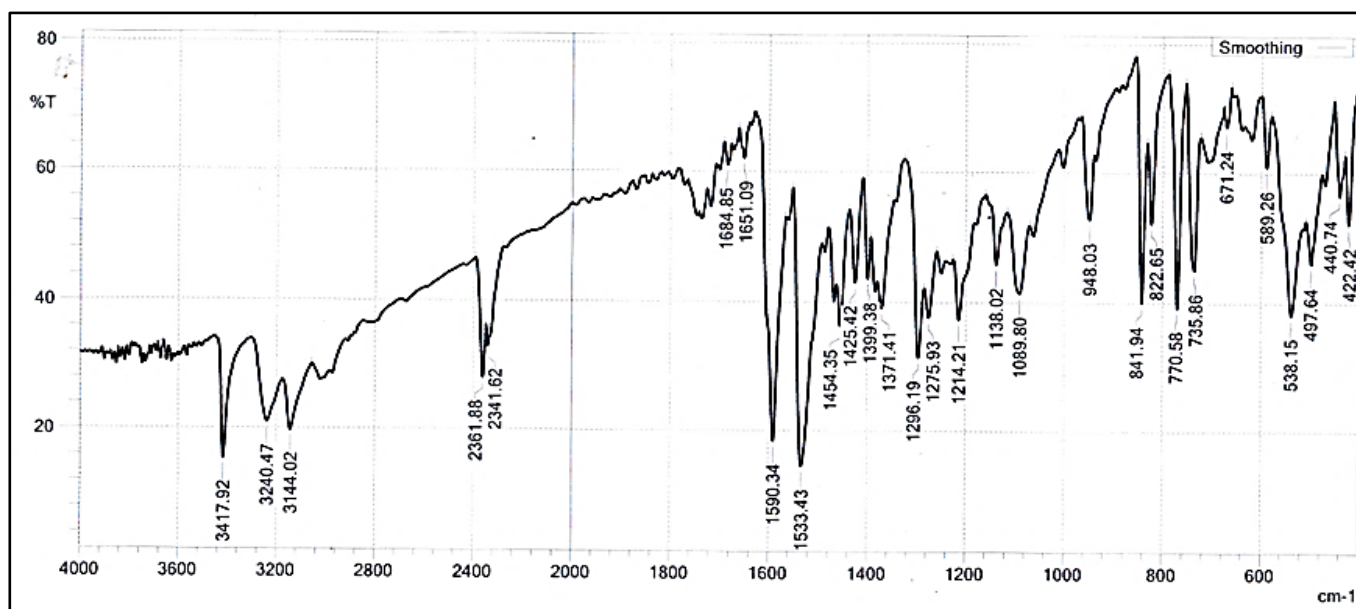

**Fig. S1.** IR spectrum of **1a**.

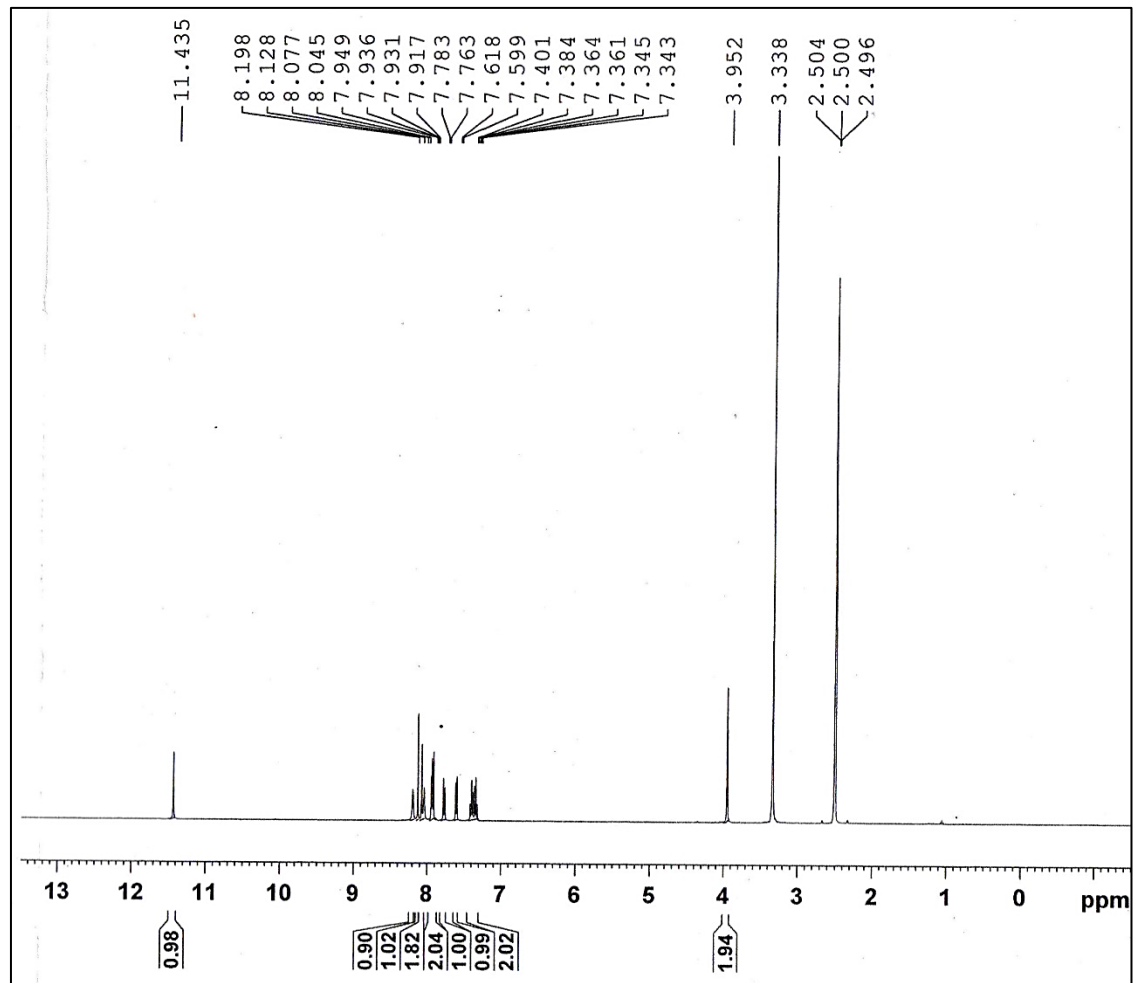

Fig. S2.  $^1\text{H}$  NMR spectrum of **1a**.

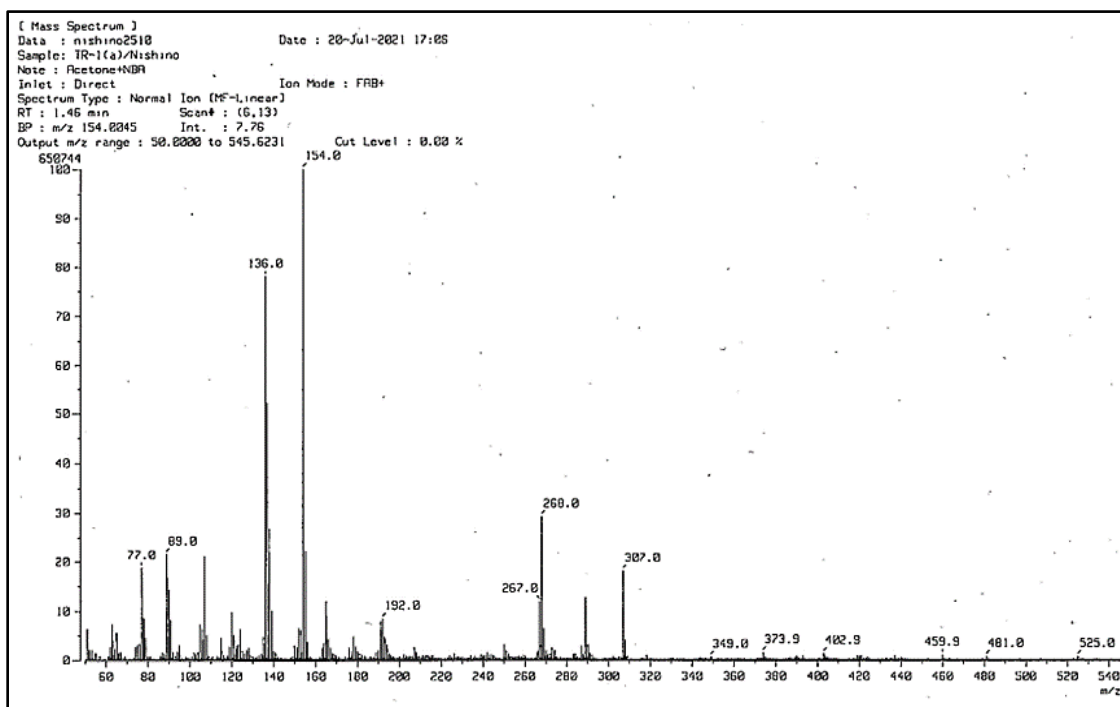

[ Elemental Composition ]  
 Date : 20-Jul-2021 17:13 Page: 1  
 Data : nishino2511  
 Sample: TR-1(a)/Nishino  
 Note : Acetone+NBA  
 Inlet : Direct Ion Mode : FAB+  
 RT : 4.38 min Scan# : (16,21)  
 Elements : C 100/0, H 100/0, N 4/2, S 2/0  
 Mass Tolerance : 20ppm, 10mmu if m/z < 500, 20mmu if m/z > 1000  
 Unsaturation (U.S.) : -0.5 - 50.0

| Observed m/z | Int% | Err [ppm / mmu] | U.S. | Composition       |
|--------------|------|-----------------|------|-------------------|
| 268.0933     | 14.9 | -25.2 / -6.8    | 15.0 | C 19 H 12 N 2     |
|              |      | +21.7 / +5.8    | 15.5 | C 18 H 10 N 3     |
|              |      | +9.1 / +2.4     | 11.5 | C 15 H 14 N 3 S   |
|              |      | -3.4 / -0.9     | 7.5  | C 12 H 18 N 3 S 2 |

Fig. S3. HRMS spectrum of 1a.

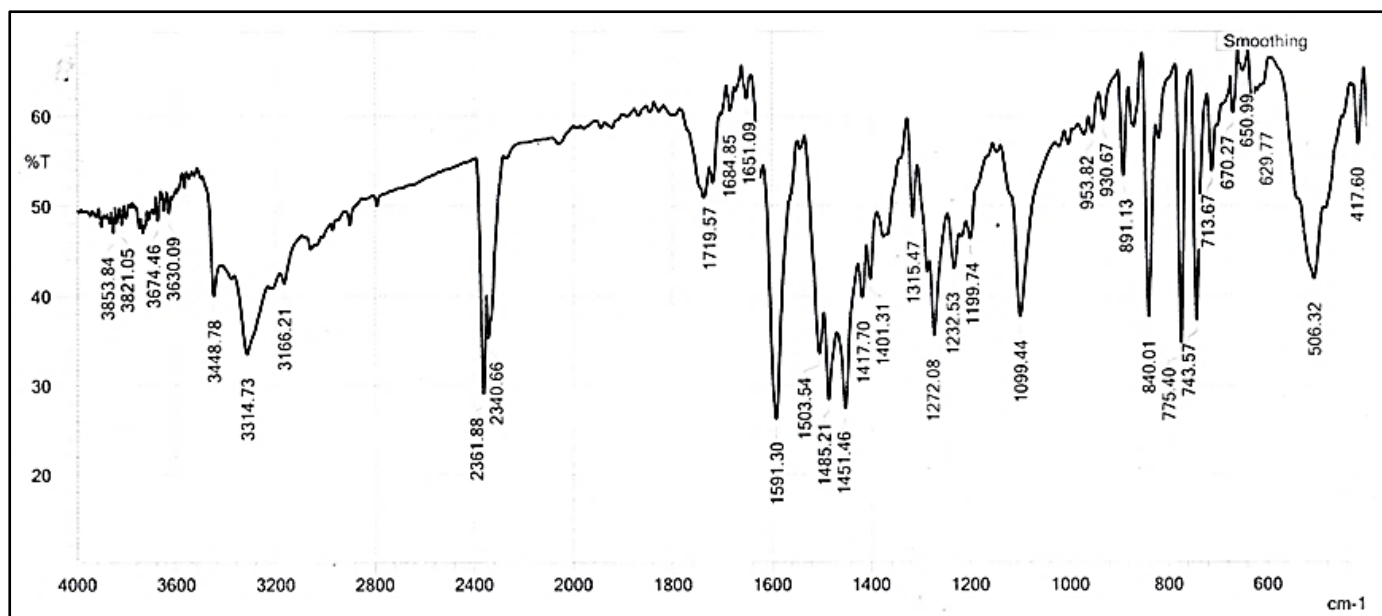

Fig. S4. IR spectrum of 1b.

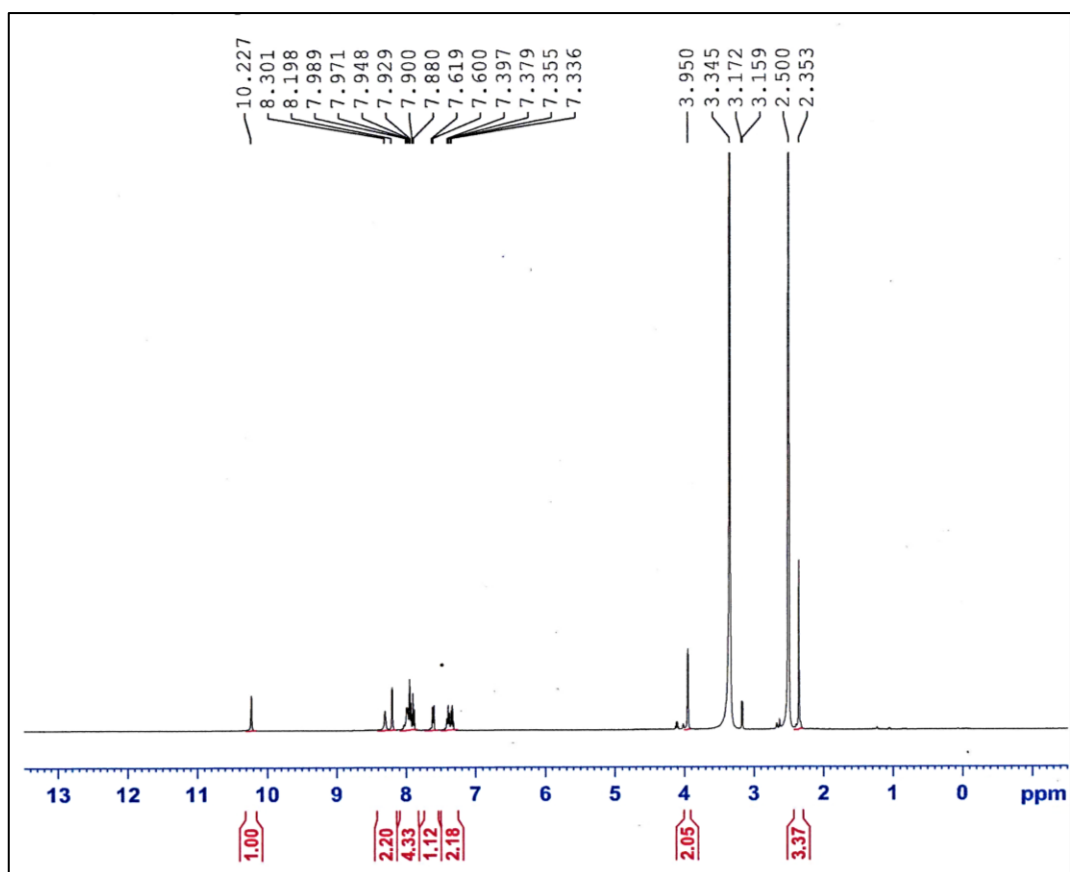

Fig. S5.  $^1\text{H}$  NMR spectrum of **1b**.

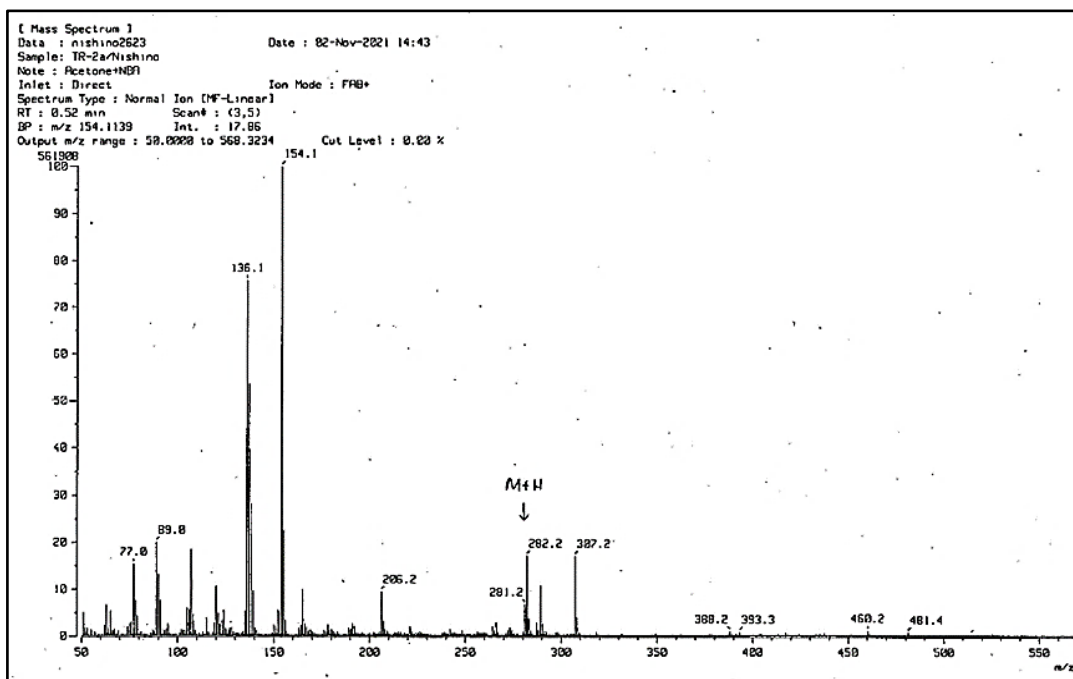

[ Elemental Composition ] Page: 1  
 Date : 02-Nov-2021 14:45  
 Data : nishino2624  
 Sample: TR-2a/Nishino  
 Note : Acetone+NBA  
 Inlet : Direct Ion Mode : FAB+  
 RT : 4.50 min Scan#: (16,22)  
 Elements : C 100/0, H 100/0, N 4/2, S 2/0  
 Mass Tolerance : 20ppm, 10ppm if m/z < 500, 20ppm if m/z > 1000  
 Unsaturation (U.S.) : -0.5 - 50.0

| Observed m/z | Int% | Err [ppm / mmu] | U.S. | Composition       |
|--------------|------|-----------------|------|-------------------|
| 282.1073     | 44.6 | -29.7 / -8.4    | 15.0 | C 20 H 14 N 2     |
|              |      | +14.9 / +4.2    | 15.5 | C 19 H 12 N 3     |
|              |      | +3.0 / +0.8     | 11.5 | C 16 H 16 N 3 S   |
|              |      | -9.0 / -2.5     | 7.5  | C 13 H 20 N 3 S 2 |

Fig. S6. HRMS spectrum of 1b.

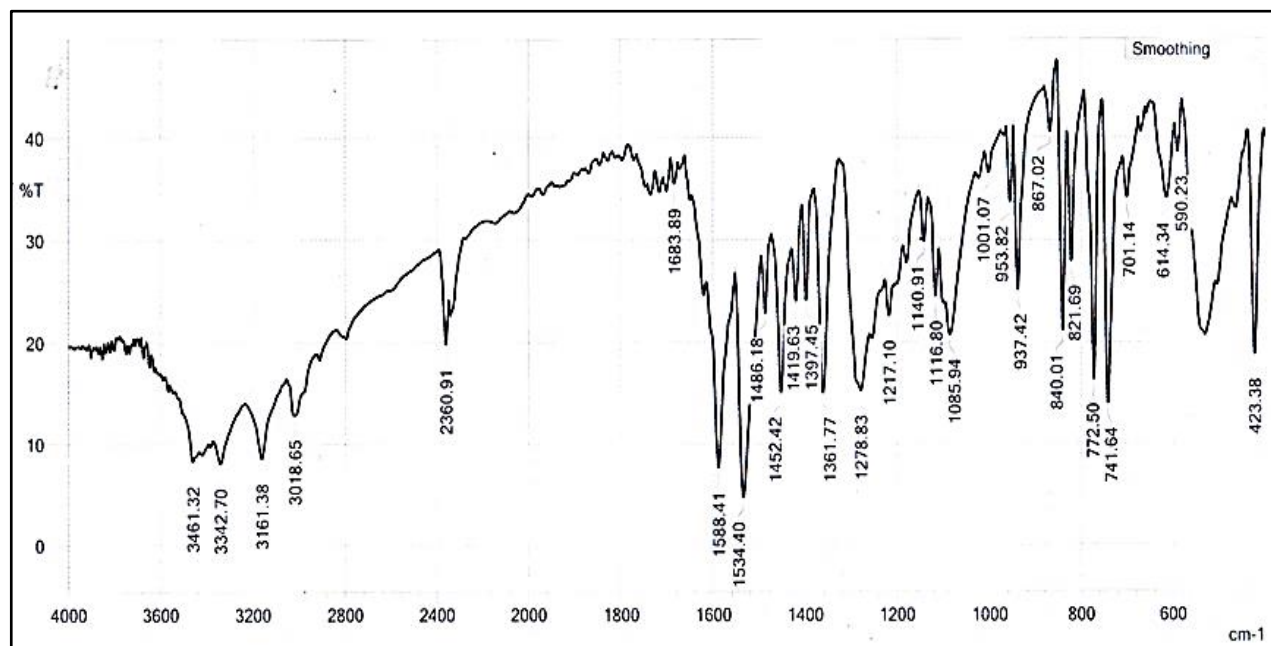

Fig. S7. IR spectrum of 2a.



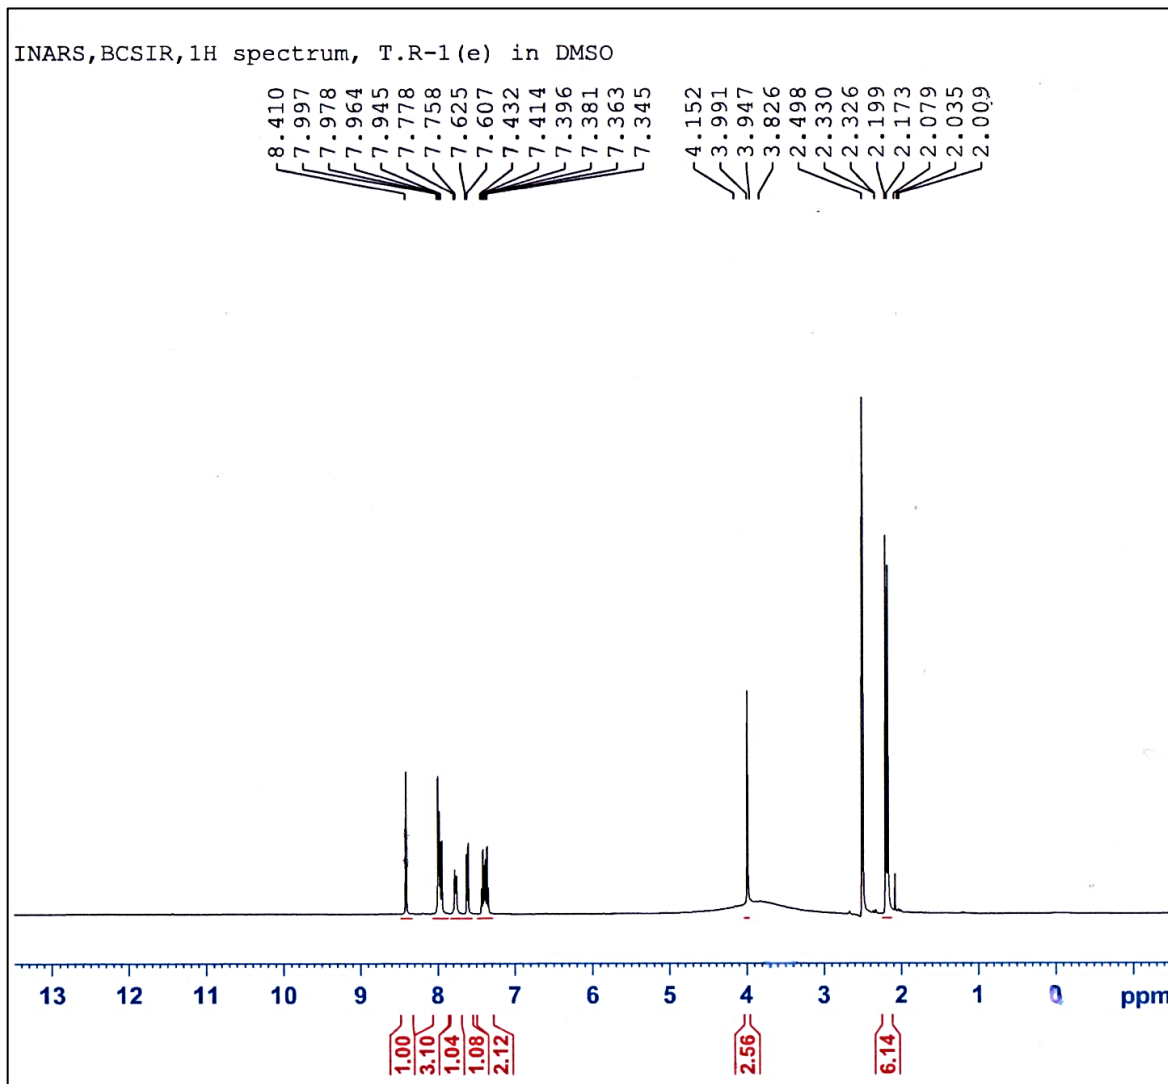

Fig. S8.  $^1\text{H}$  NMR spectrum of **2a**.

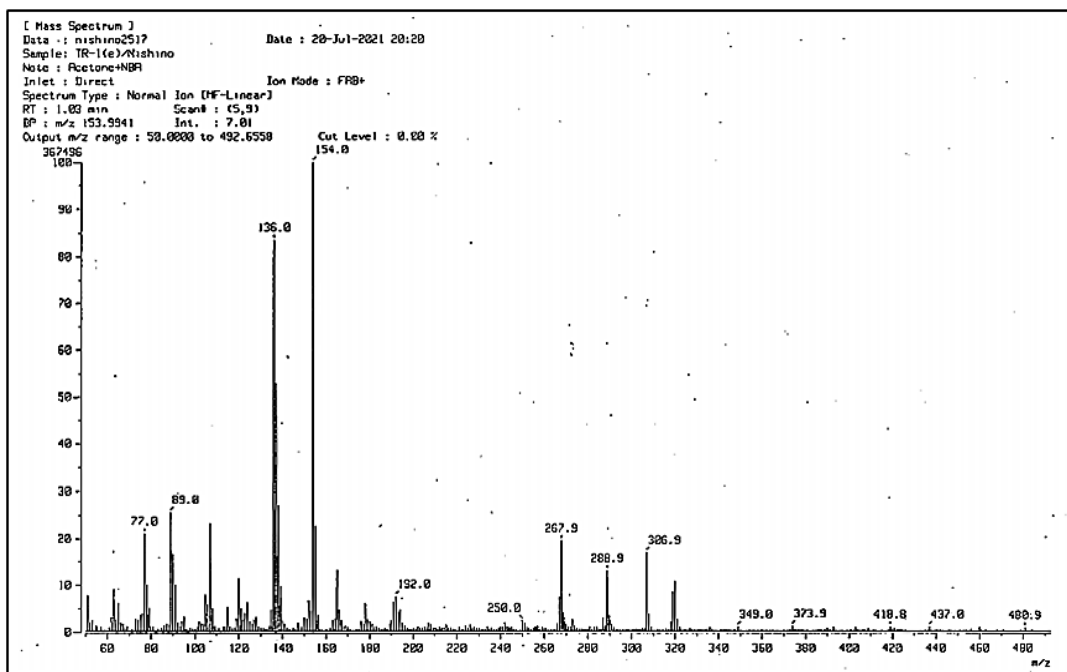

[ Elemental Composition ]  
 Date : 20-Jul-2021 20:23 Page: 1  
 Data : nishino2518  
 Sample: TR-1(e)/Nishino  
 Note : Acetone+NBA  
 Inlet : Direct Ion Mode : FAB+  
 RT : 4.63 min Scan#: (16,23)  
 Elements : C 100/0, H 100/0, N 4/2, S 2/0  
 Mass Tolerance : 20ppm, 10mmu if m/z < 500, 20mmu if m/z > 1000  
 Unsaturation (U.S.) : -0.5 - 50.0

| Observed m/z | Int% | Err [ppm / mmu] | U.S. | Composition       |
|--------------|------|-----------------|------|-------------------|
| 319.1147     | 64.4 | -27.6 / -8.8    | 17.5 | C 23 H 15 N 2     |
|              |      | +11.8 / +3.8    | 18.0 | C 22 H 13 N 3     |
|              |      | +1.2 / +0.4     | 14.0 | C 19 H 17 N 3 S   |
|              |      | -9.3 / -3.0     | 10.0 | C 16 H 21 N 3 S 2 |
|              |      | +30.1 / +9.6    | 10.5 | C 15 H 19 N 4 S 2 |
| 320.1212     | 71.7 | +7.7 / +2.5     | 17.5 | C 22 H 14 N 3     |
|              |      | -2.8 / -0.9     | 13.5 | C 19 H 18 N 3 S   |
|              |      | -13.3 / -4.3    | 9.5  | C 16 H 22 N 3 S 2 |
|              |      | +25.9 / +8.3    | 10.0 | C 15 H 20 N 4 S 2 |

Fig. S9. HRMS spectrum of 2a.

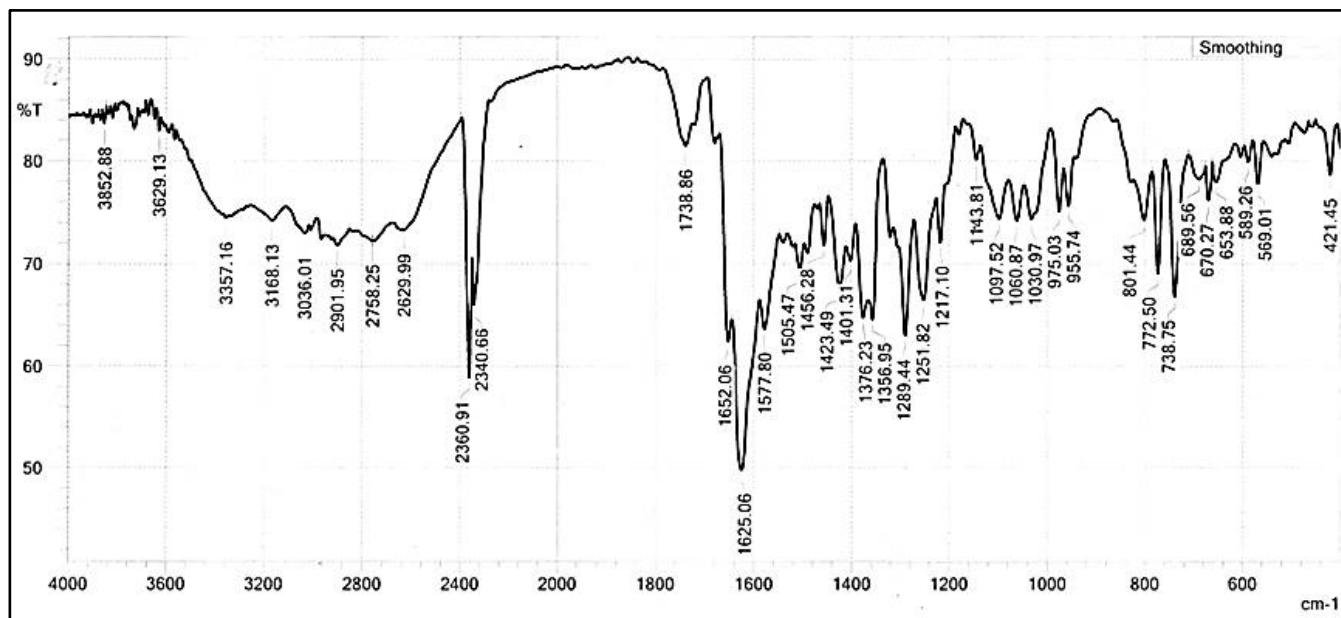

**Fig. S10.** IR spectrum of **2b**.

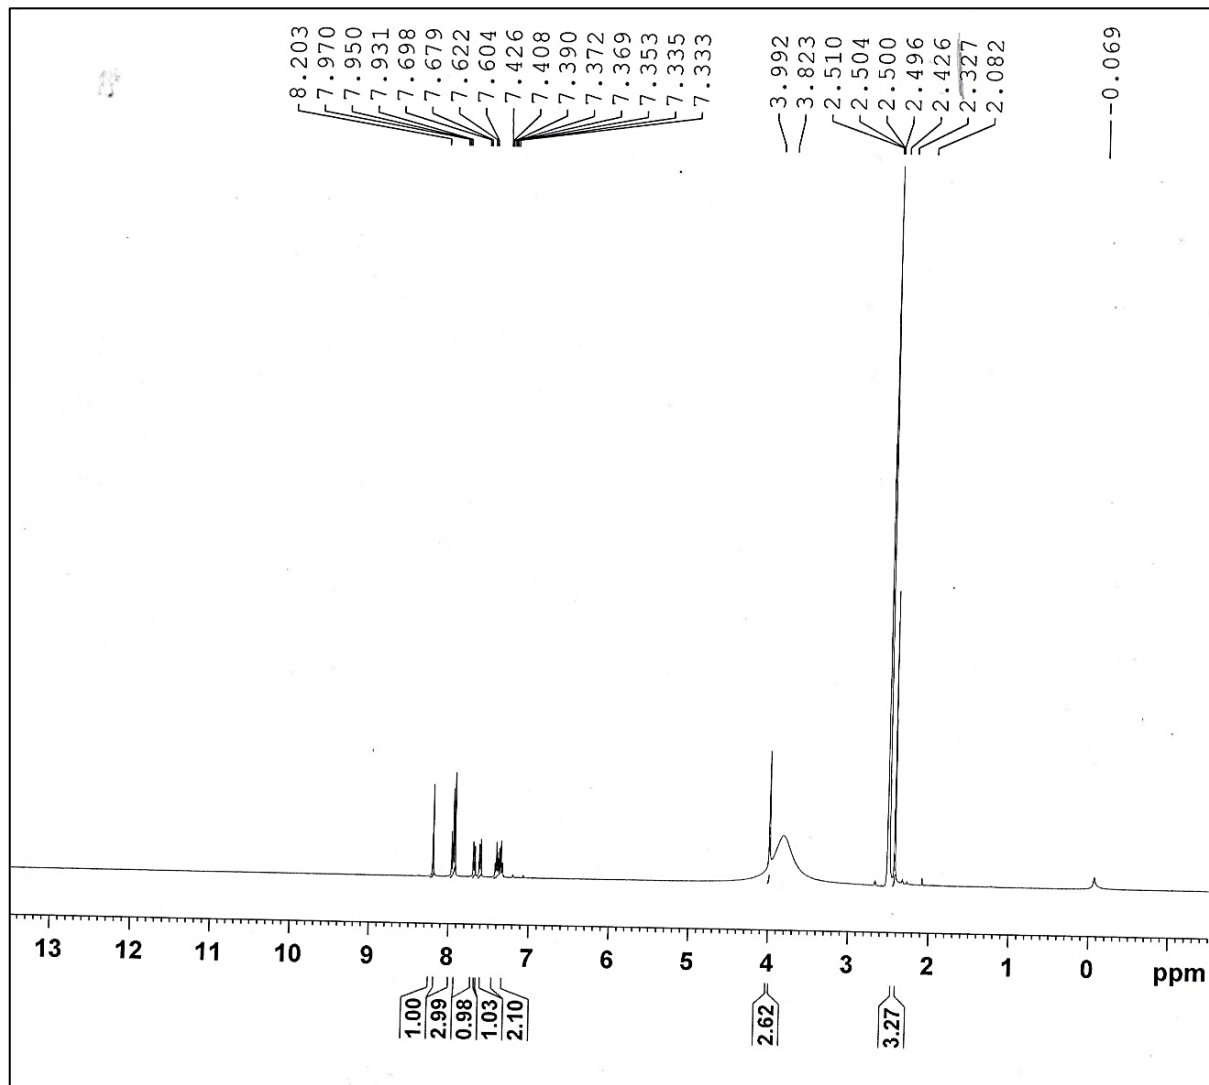

Fig. S11.  $^1\text{H}$  NMR spectrum of **2b**.

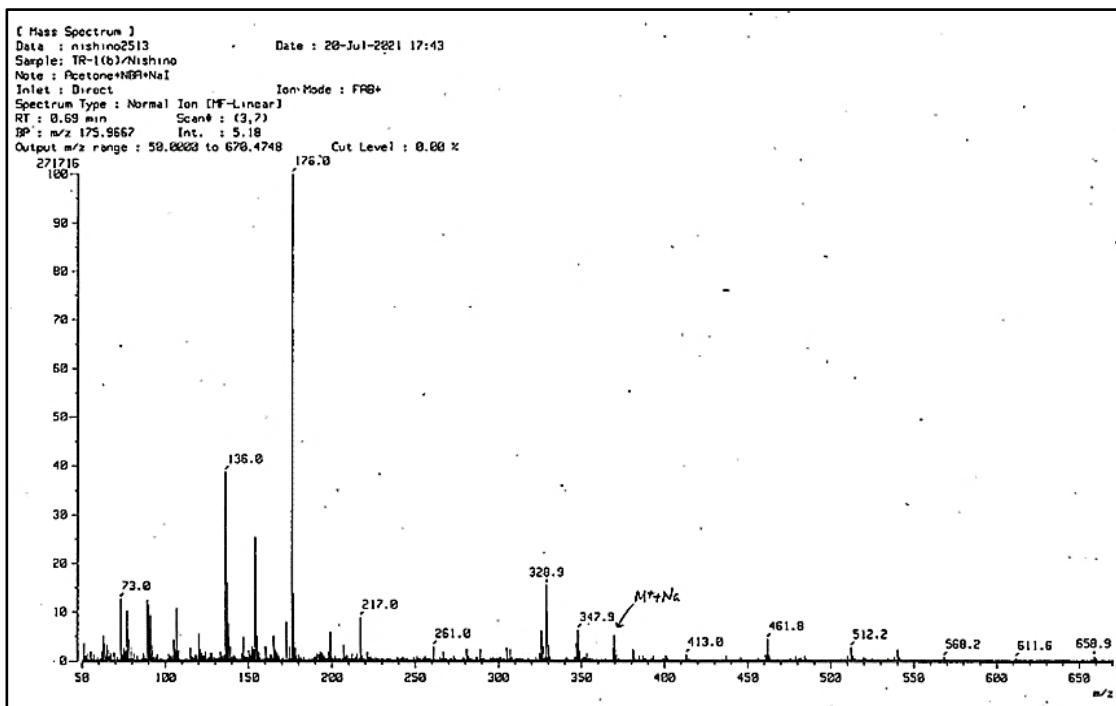

[ Elemental Composition ]  
 Data : nishino2514 Date : 20-Jul-2021 17:50 Page: 1  
 Sample: TR-1(b)/Nishino  
 Note : Acetone+NBA+NaI  
 Inlet : Direct Ion Mode : FAB+  
 RT : 1.13 min Scan#: (3,8)  
 Elements : C 100/0, H 100/0, O 2/0, N 4/2, S 2/0, Na 1/1  
 Mass Tolerance : 20ppm, 10mmu if m/z < 500, 20mmu if m/z > 1000  
 Unsaturation (U.S.) : -0.5 - 50.0

| Observed m/z | Int%  | Err [ppm / mmu] | U.S. | Composition            |
|--------------|-------|-----------------|------|------------------------|
| 370.1021     | 100.0 | -16.6 / -6.2    | 18.0 | C 24 H 15 O N 2 Na     |
|              |       | +17.3 / +6.4    | 18.5 | C 23 H 13 O N 3 Na     |
|              |       | -25.7 / -9.5    | 14.0 | C 21 H 19 O N 2 S Na   |
|              |       | +8.2 / +3.0     | 14.5 | C 20 H 17 O N 3 S Na   |
|              |       | -0.9 / -0.3     | 10.5 | C 17 H 21 O N 3 S 2 Na |

Fig. S12. HRMS spectrum of 2b.

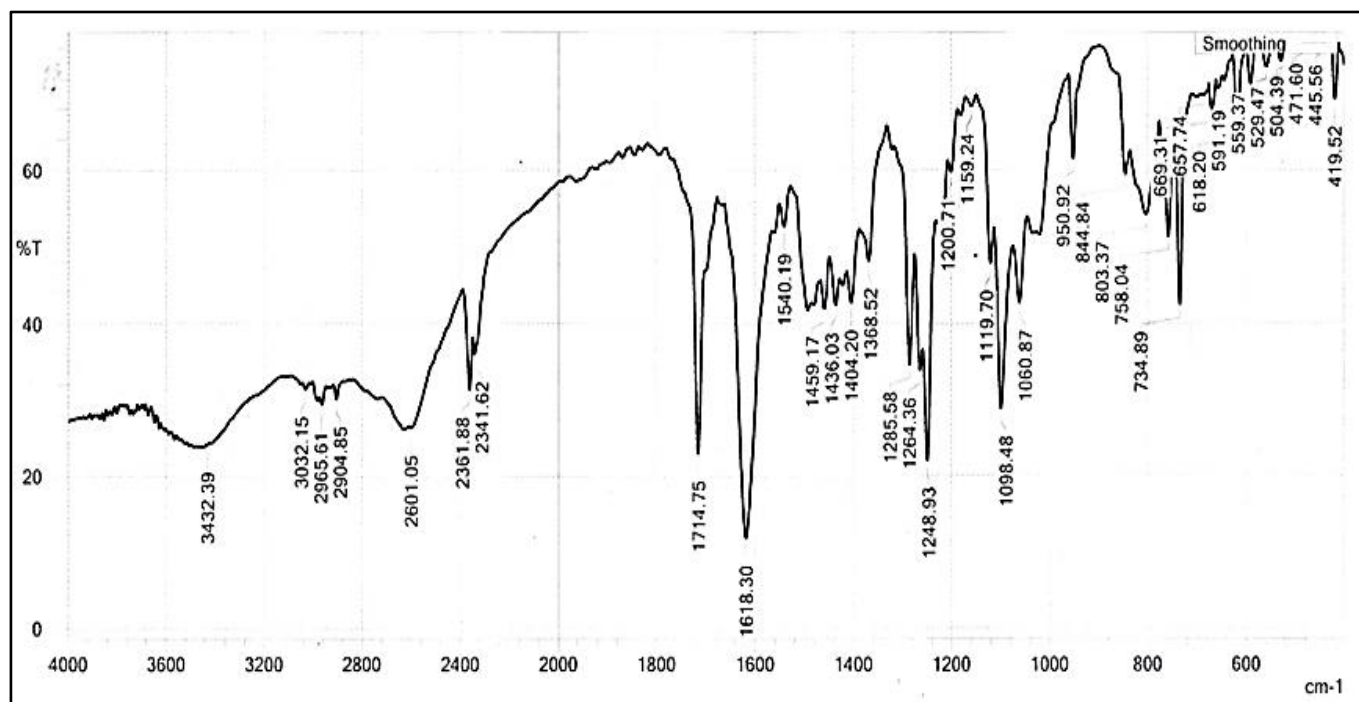

Fig. S13. IR spectrum of 2c.

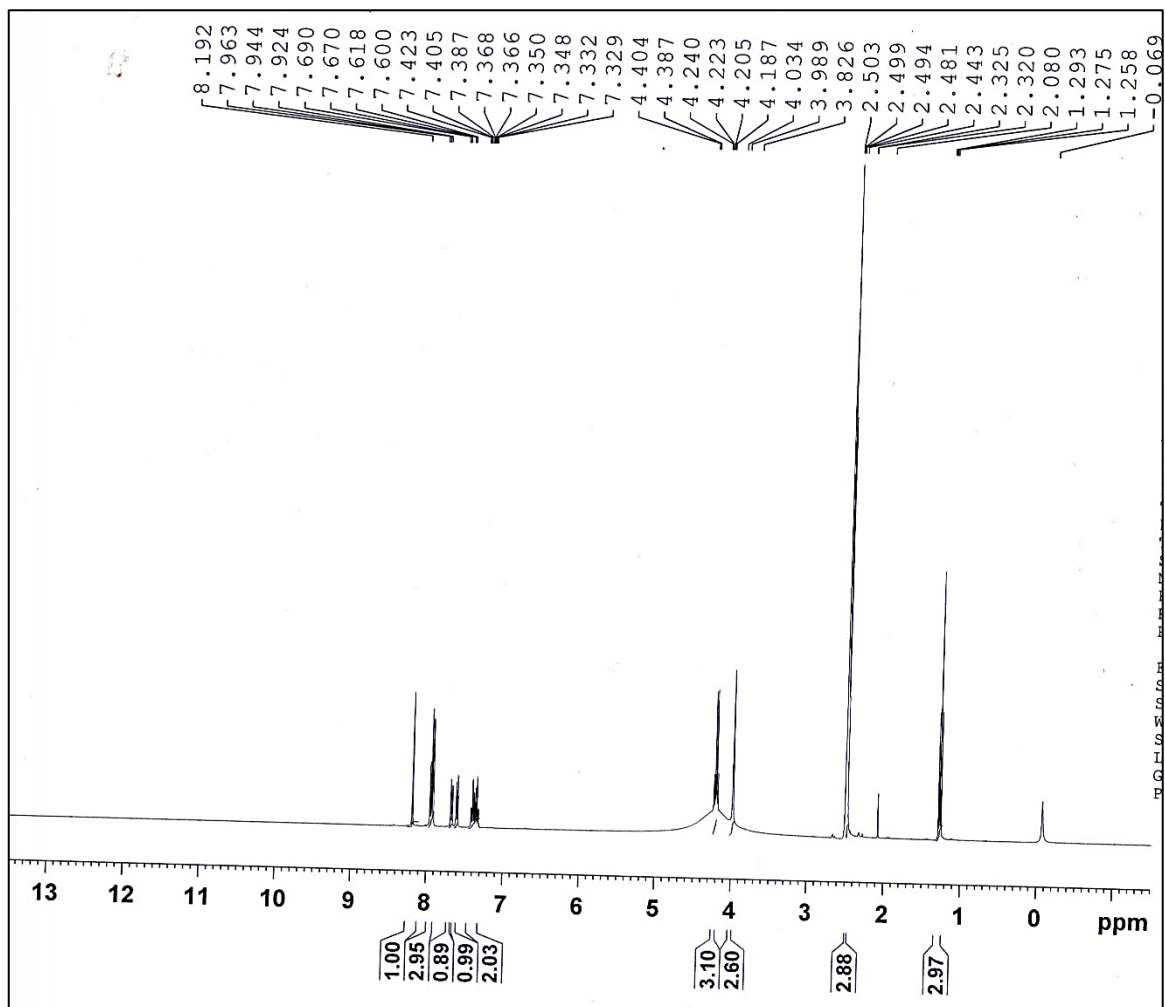

Fig. S14.  $^1\text{H}$  NMR spectrum of **2c**.

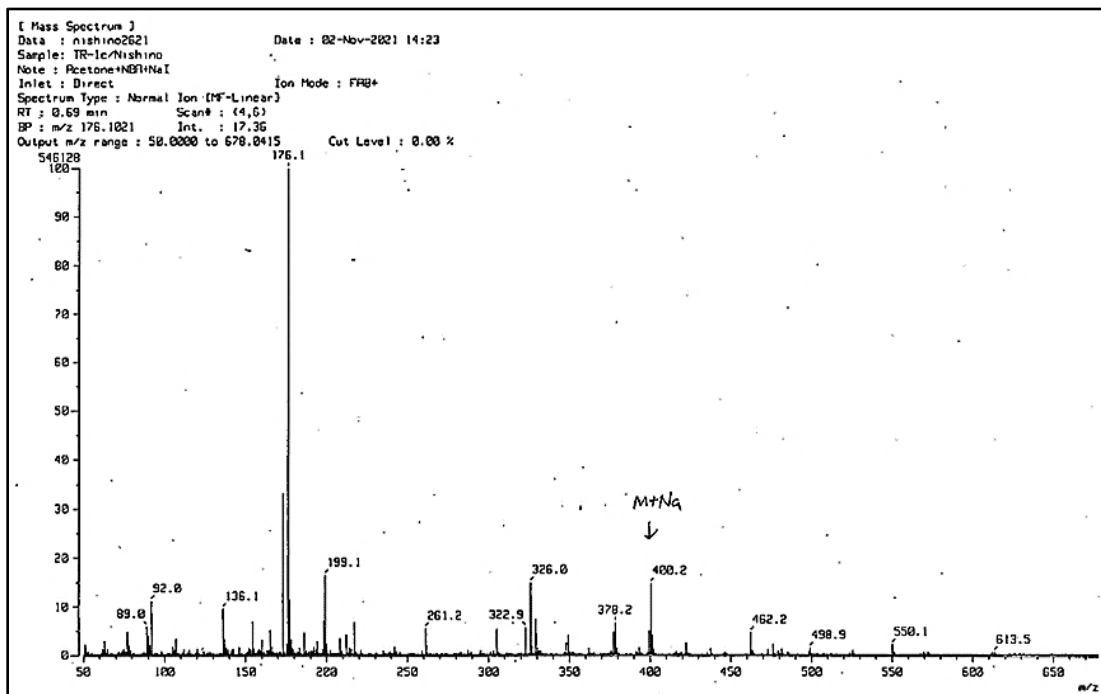

[ Elemental Composition ]  
 Date : 02-Nov-2021 14:25 Page: 1  
 Data : nishino2622  
 Sample: TR-1c/Nishino  
 Note : Acetone+NBA+NaI  
 Inlet : Direct Ion Mode : FAB+  
 RT : 4.75 min Scan# : (18,22)  
 Elements : C 100/0, H 100/0, O 3/1, N 4/2, S 2/0, Na 1/1  
 Mass Tolerance : 20ppm, 10mmu if m/z < 500, 20mmu if m/z > 1000  
 Unsaturation (U.S.) : -0.5 - 50.0

| Observed m/z | Int% | Err [ppm / mmu] | U.S. | Composition              |
|--------------|------|-----------------|------|--------------------------|
| 400.1101     | 14.4 | -21.6 / -8.6    | 18.0 | C 25 H 17 O 2 N 2 Na     |
|              |      | +9.9 / +3.9     | 18.5 | C 24 H 15 O 2 N 3 Na     |
|              |      | +1.4 / +0.6     | 14.5 | C 21 H 19 O 2 N 3 S Na   |
|              |      | -7.0 / -2.8     | 10.5 | C 18 H 23 O 2 N 3 S 2 Na |
|              |      | +24.4 / +9.8    | 11.0 | C 17 H 21 O 2 N 4 S 2 Na |

Fig. S15. HRMS spectrum of 2c.



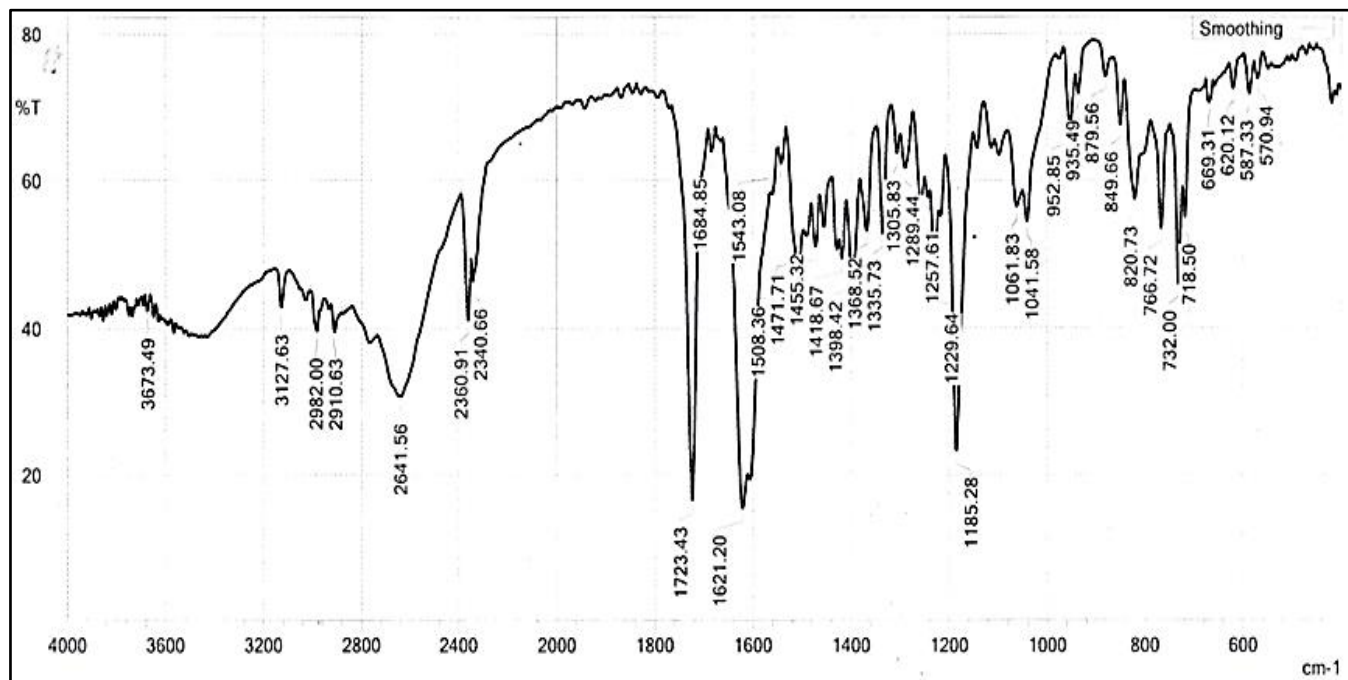

Fig. S16. IR spectrum of 2d.

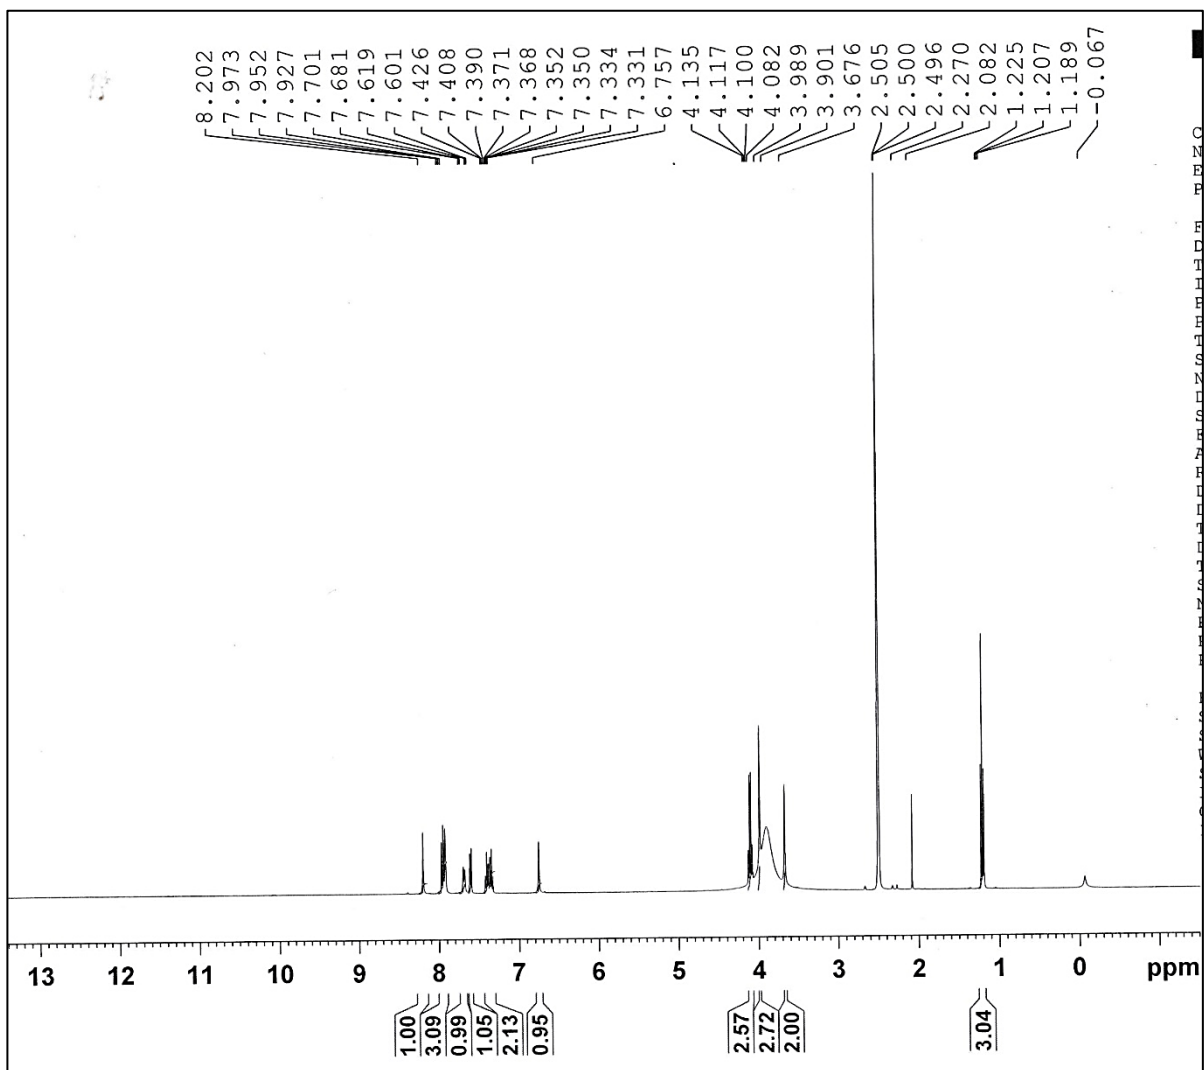

Fig. S17. <sup>1</sup>H NMR spectrum of **2d**.

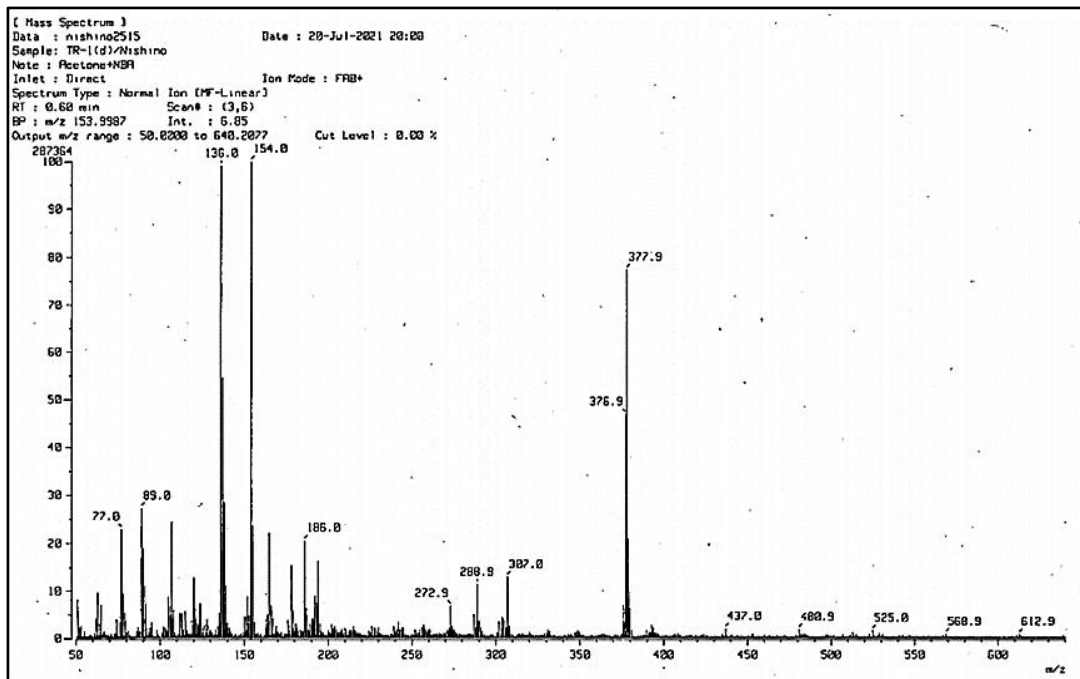

[ Elemental Composition ]  
 Date : 20-Jul-2021 20:02 Page: 1  
 Data : nishino2516  
 Sample: TR-1(d)/Nishino  
 Note : Acetone+NBA  
 Inlet : Direct Ion Mode : FAB+  
 RT : 4.25 min Scan# : (15,21)  
 Elements : C 100/0, H 100/0, O 3/1, N 4/2, S 2/0  
 Mass Tolerance : 20ppm, 10mmu if m/z < 500, 20mmu if m/z > 1000  
 Unsaturation (U.S.) : -0.5 - 50.0

| Observed m/z | Int% | Err [ppm / mmu] | U.S. | Composition           |
|--------------|------|-----------------|------|-----------------------|
| 378.1281     | 72.7 | -23.0 / -8.7    | 18.0 | C 25 H 18 O 2 N 2     |
|              |      | +10.3 / +3.9    | 18.5 | C 24 H 16 O 2 N 3     |
|              |      | +1.4 / +0.5     | 14.5 | C 21 H 20 O 2 N 3 S   |
|              |      | -7.5 / -2.9     | 10.5 | C 18 H 24 O 2 N 3 S 2 |
|              |      | +25.7 / +9.7    | 11.0 | C 17 H 22 O 2 N 4 S 2 |

Fig. S18. HRMS spectrum of 2d.

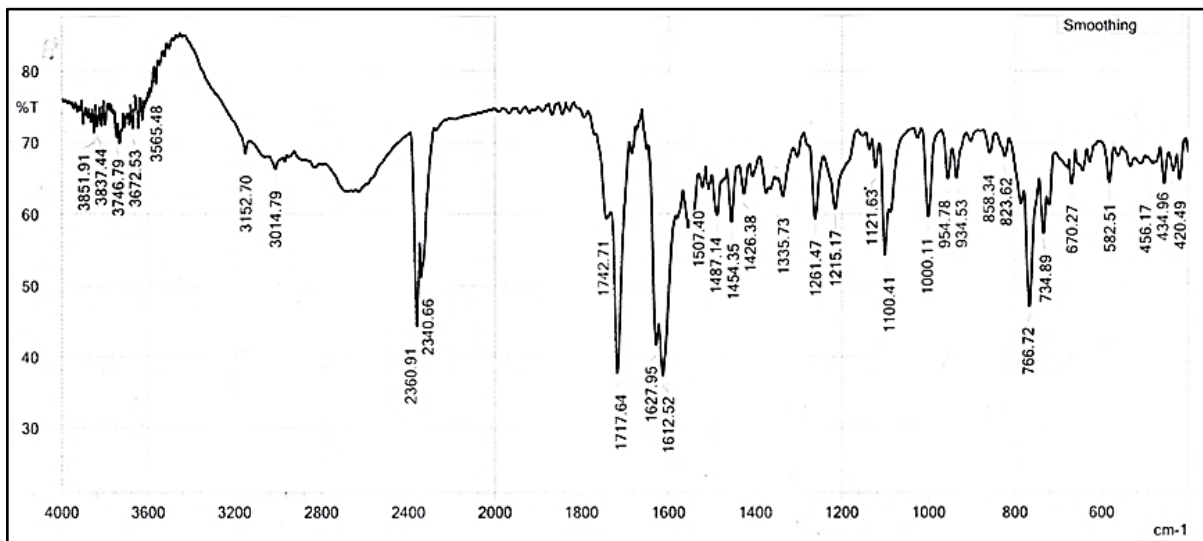

**Fig. S19.** IR spectrum of **2e**.

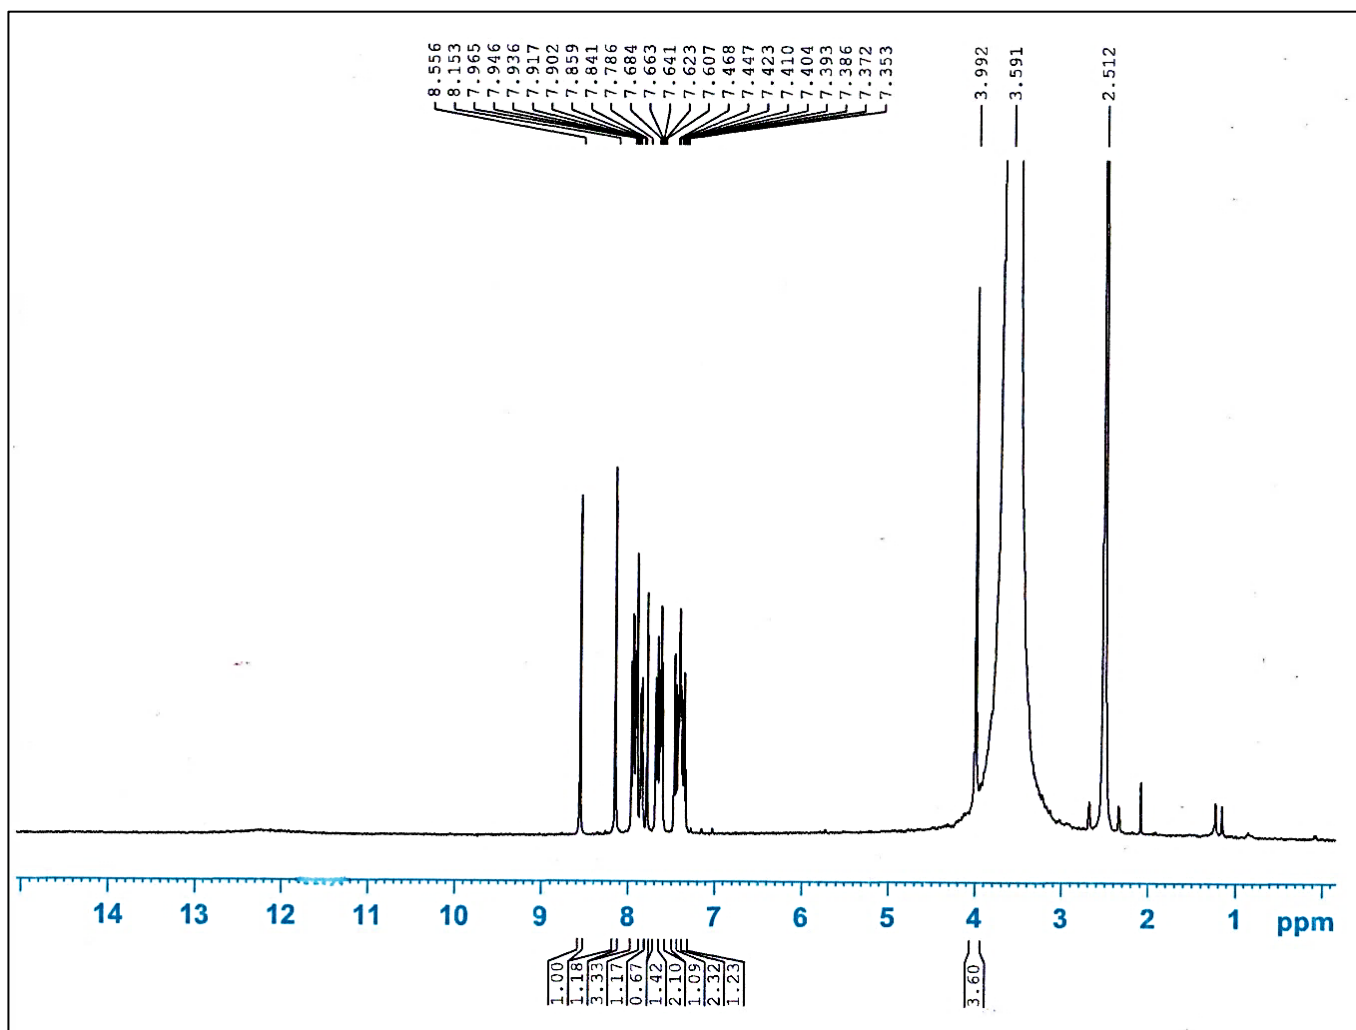

Fig. S20.  $^1\text{H}$  NMR spectrum of 2e.

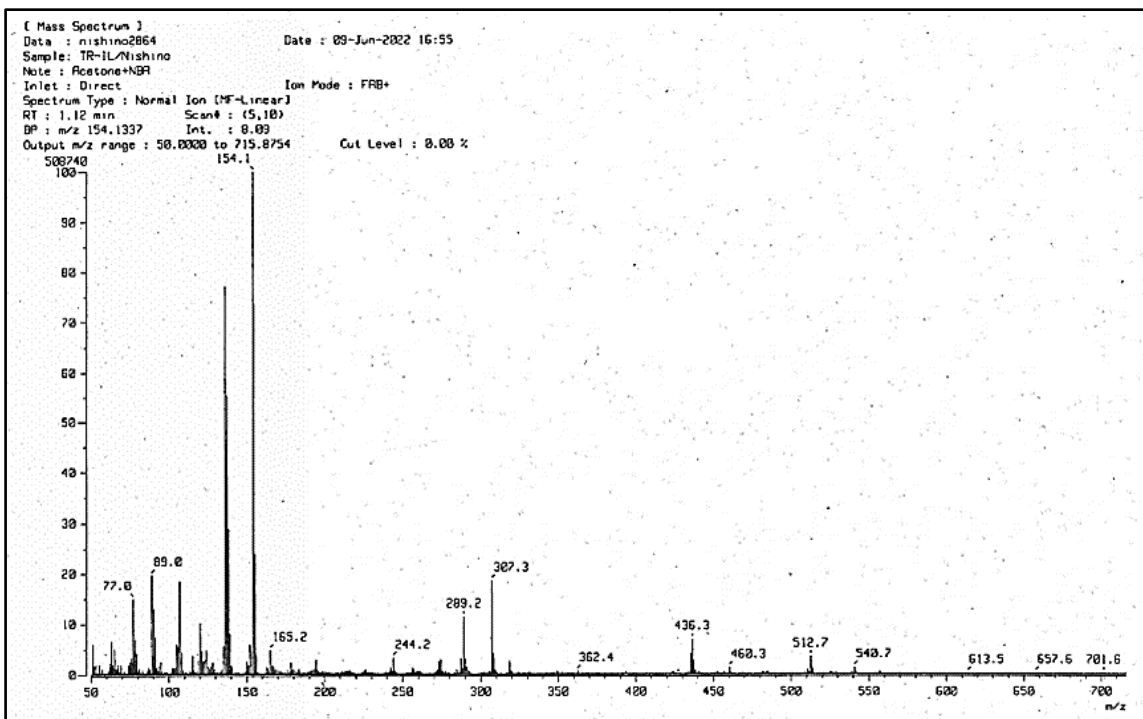

[ Elemental Composition ]  
 Date : 09-Jun-2022 17:03 Page: 1  
 Data : nishino2865  
 Sample: TR-1L/Nishino  
 Note : Acetone+NBA  
 Inlet : Direct Ion Mode : FAB+  
 RT : 1.75 min Scan# : (5,11)  
 Elements : C 100/0, H 100/0, O 3/1, N 4/2, S 2/0  
 Mass Tolerance : 20ppm, 10mmu if m/z < 500, 20mmu if m/z > 1000  
 Unsaturation (U.S.) : -0.5 - 50.0

| Observed m/z | Int%  | Err [ppm / mmu] | U.S. | Composition           |
|--------------|-------|-----------------|------|-----------------------|
| 436.1117     | 100.0 | -21.8 / -9.5    | 24.0 | C 30 H 16 O 2 N 2     |
|              |       | +7.0 / +3.1     | 24.5 | C 29 H 14 O 2 N 3     |
|              |       | -0.7 / -0.3     | 20.5 | C 26 H 18 O 2 N 3 S   |
|              |       | -8.4 / -3.7     | 16.5 | C 23 H 22 O 2 N 3 S 2 |
|              |       | +20.4 / +8.9    | 17.0 | C 22 H 20 O 2 N 4 S 2 |

Fig. S21. HRMS spectrum of 2e.

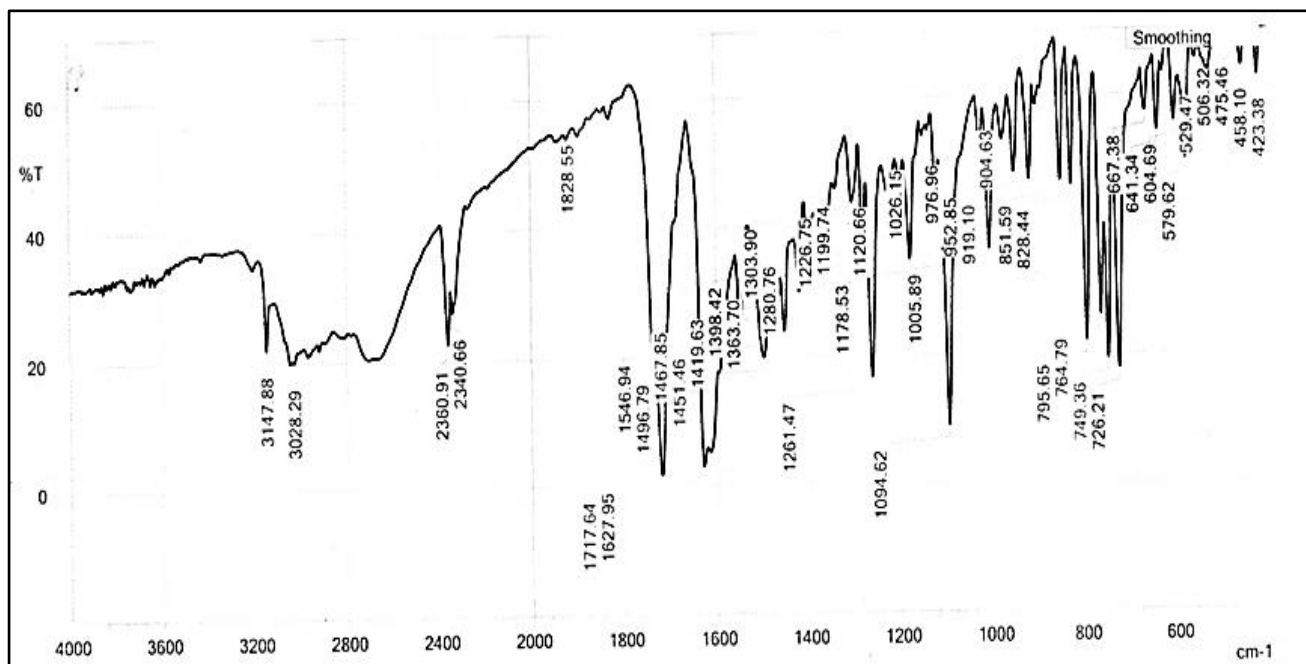

Fig. S22. IR spectrum of 2f.

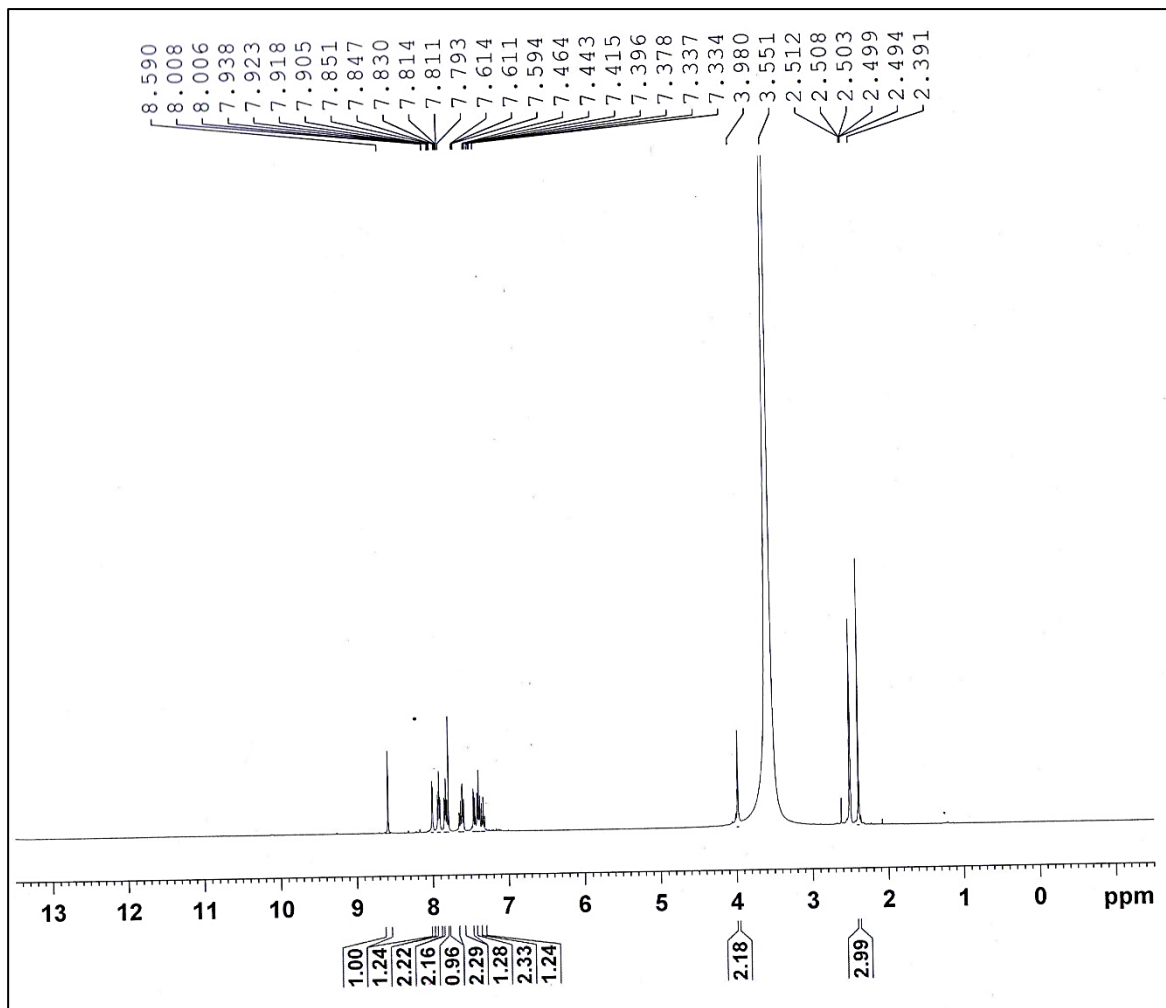

Fig. S23.  $^1\text{H}$  NMR spectrum of **2f**.



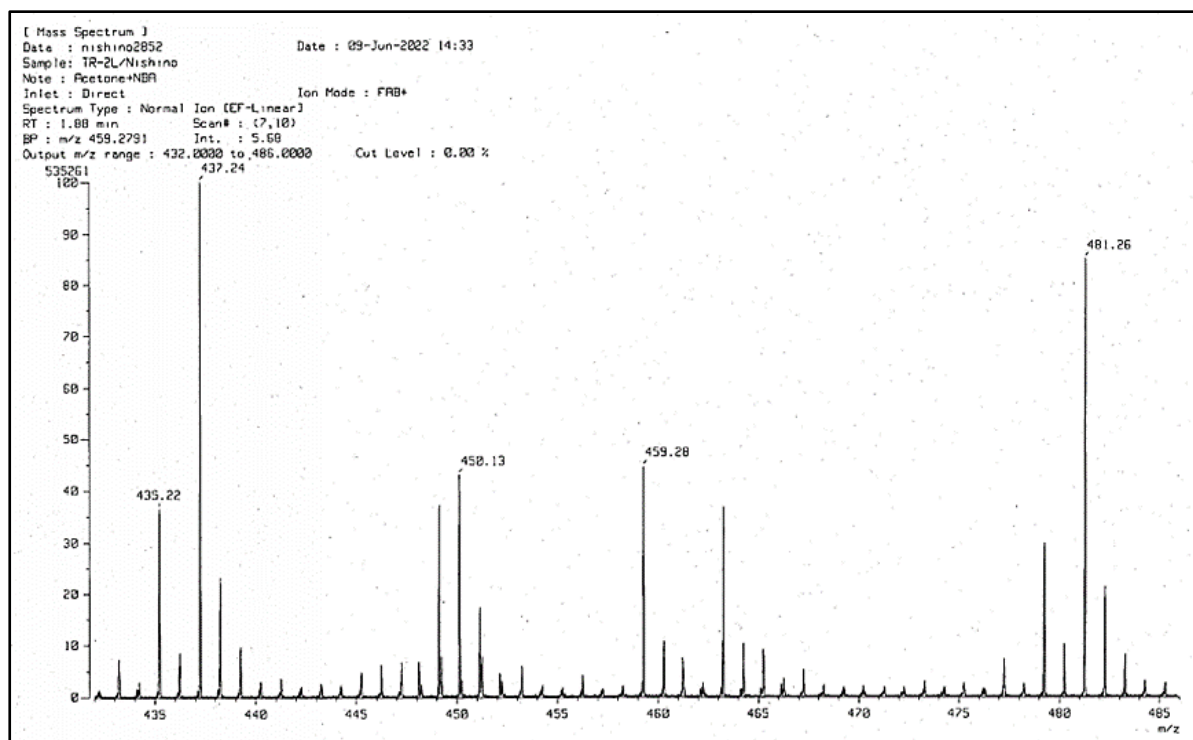

[ Elemental Composition ] Page: 1

Data : nishino2852 Date : 09-Jun-2022 14:33  
 Sample: TR-2L/Nishino  
 Note : Acetone+NBA  
 Inlet : Direct Ion Mode : FAB+  
 RT : 1.88 min Scan# : (7,10)  
 Elements : C 100/0, H 100/0, O 3/1, N 4/2, S 2/0  
 Mass Tolerance : 20ppm, 10mmu if m/z < 500, 20mmu if m/z > 1000  
 Unsaturation (U.S.) : -0.5 - 50.0

| Observed m/z | Int% | Err [ppm / mmu] | U.S. | Composition           |
|--------------|------|-----------------|------|-----------------------|
| 450.1266     | 96.6 | +5.1 / +2.3     | 24.5 | C 30 H 16 O 2 N 3     |
|              |      | -2.4 / -1.1     | 20.5 | C 27 H 20 O 2 N 3 S   |
|              |      | -9.9 / -4.4     | 16.5 | C 24 H 24 O 2 N 3 S 2 |
|              |      | +18.1 / +8.1    | 17.0 | C 23 H 22 O 2 N 4 S 2 |

Fig. S24. HRMS spectrum of 2f.

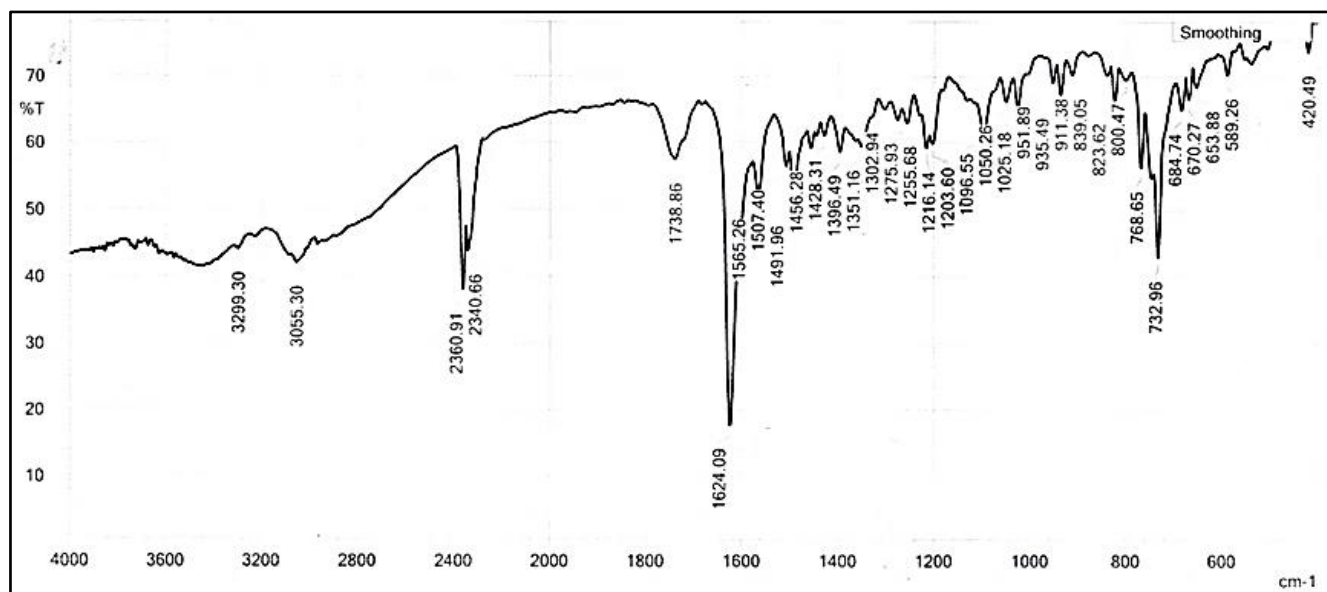

Fig. S25. IR spectrum of **2g**.

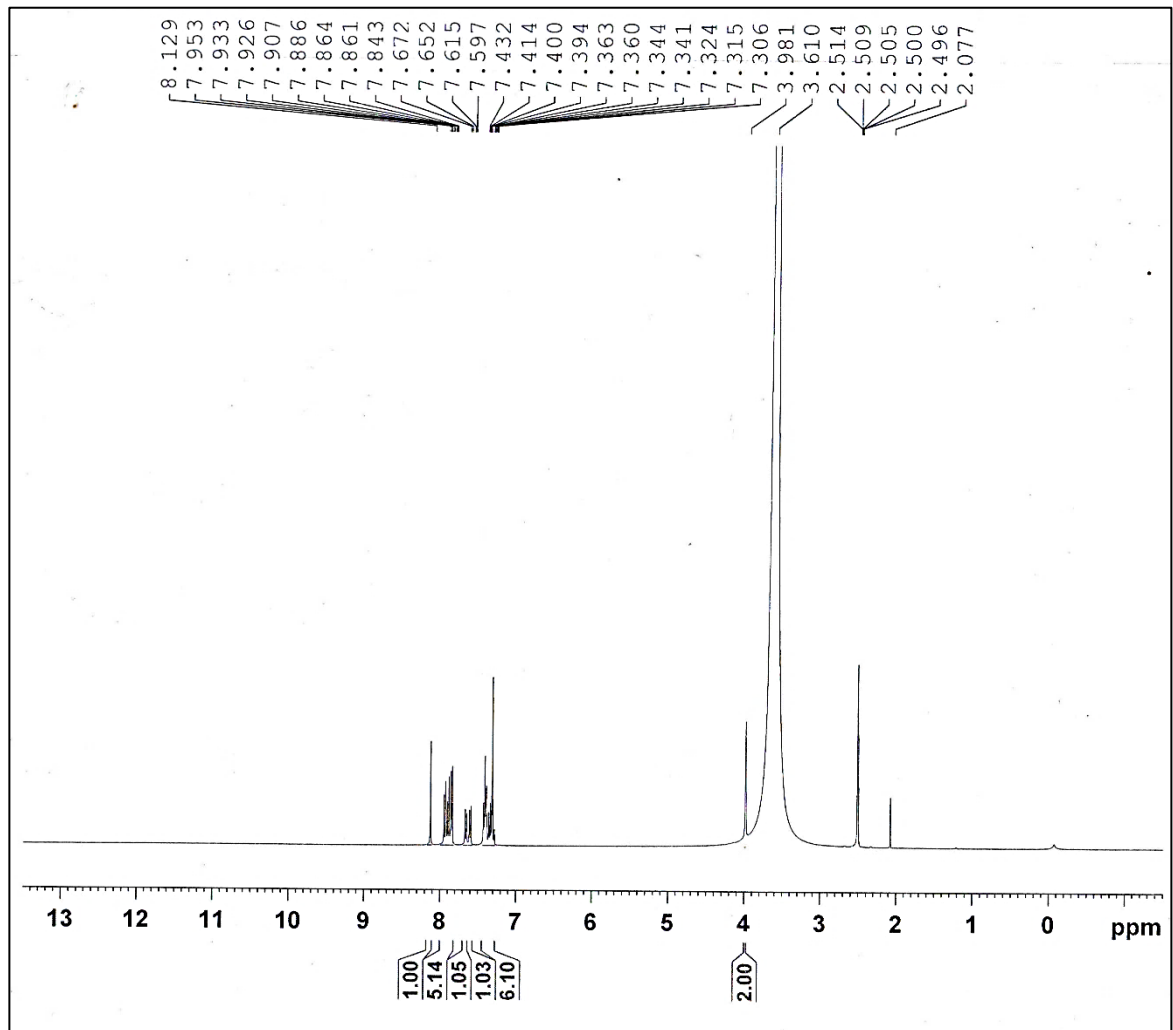

Fig. S26.  $^1\text{H}$  NMR spectrum of **2g**.

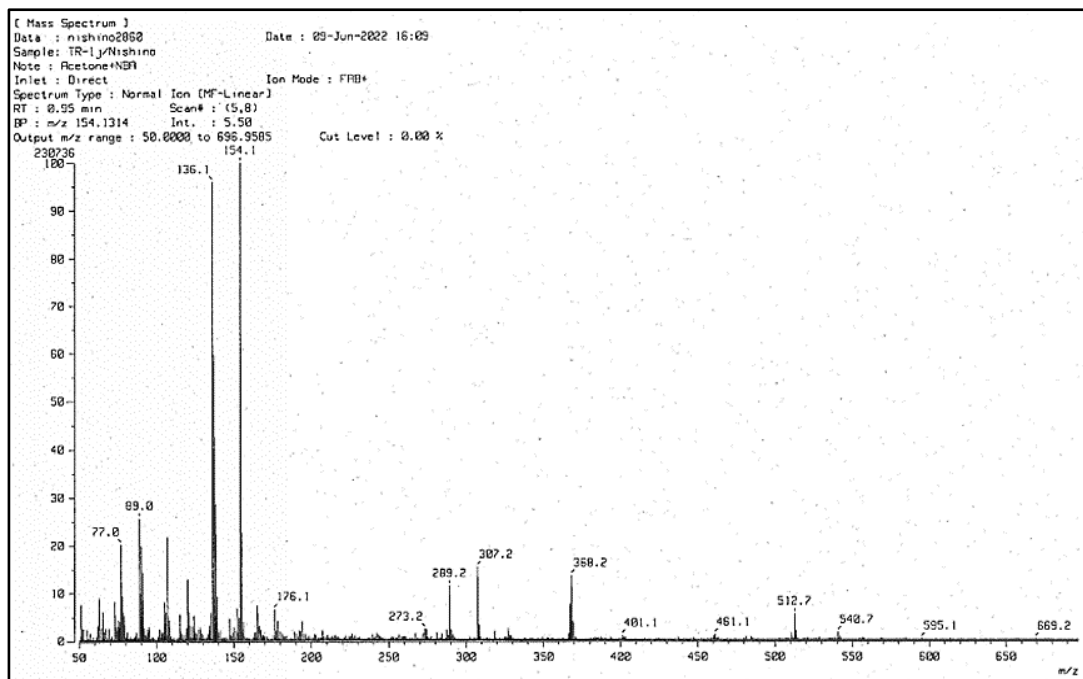

[ Elemental Composition ]  
 Date : 09-Jun-2022 16:17 Page: 1  
 Data : nishino2861  
 Sample: TR-1j/Nishino  
 Note : Acetone+NBA  
 Inlet : Direct Ion Mode : FAB+  
 RT : 1.13 min Scan# : (4,7)  
 Elements : C 100/0, H 100/0, N 4/2, S 2/0  
 Mass Tolerance : 20ppm, 10mmu if m/z < 500, 20mmu if m/z > 1000  
 Unsaturation (U.S.) : -0.5 - 50.0

| Observed m/z | Int% | Err [ppm / mmu] | U.S. | Composition       |
|--------------|------|-----------------|------|-------------------|
| 368.1220     | 56.9 | -25.3 / -9.3    | 21.0 | C 27 H 16 N 2     |
|              |      | +8.9 / +3.3     | 21.5 | C 26 H 14 N 3     |
|              |      | -0.3 / -0.1     | 17.5 | C 23 H 18 N 3 S   |
|              |      | -9.4 / -3.5     | 13.5 | C 20 H 22 N 3 S 2 |
|              |      | +24.7 / +9.1    | 14.0 | C 19 H 20 N 4 S 2 |

Fig. S27. HRMS spectrum of 2g.

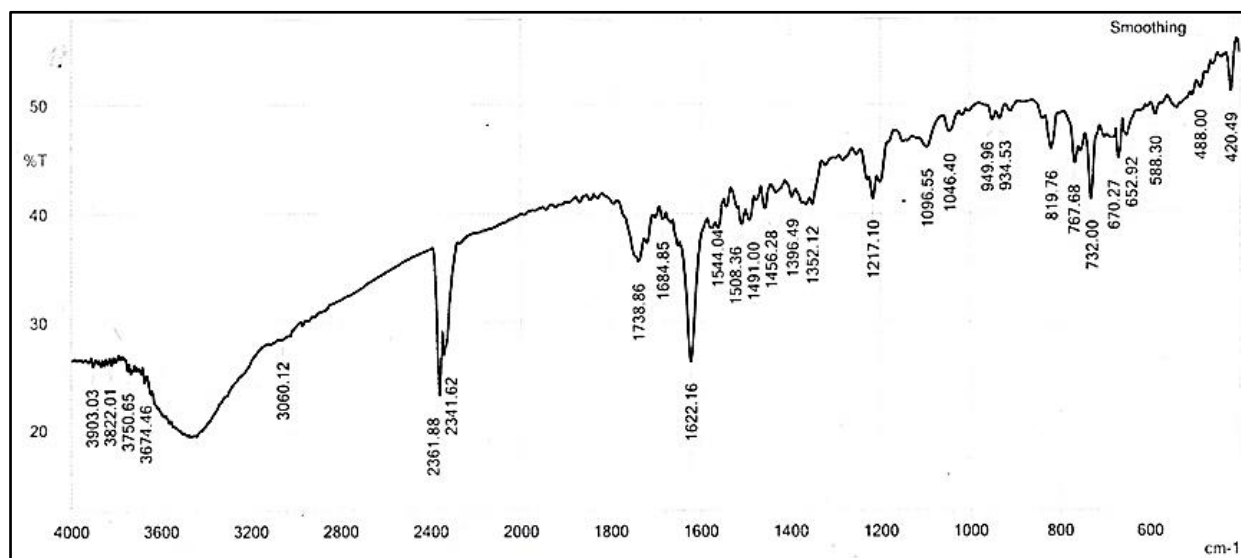

Fig. S28. IR spectrum of 2h.

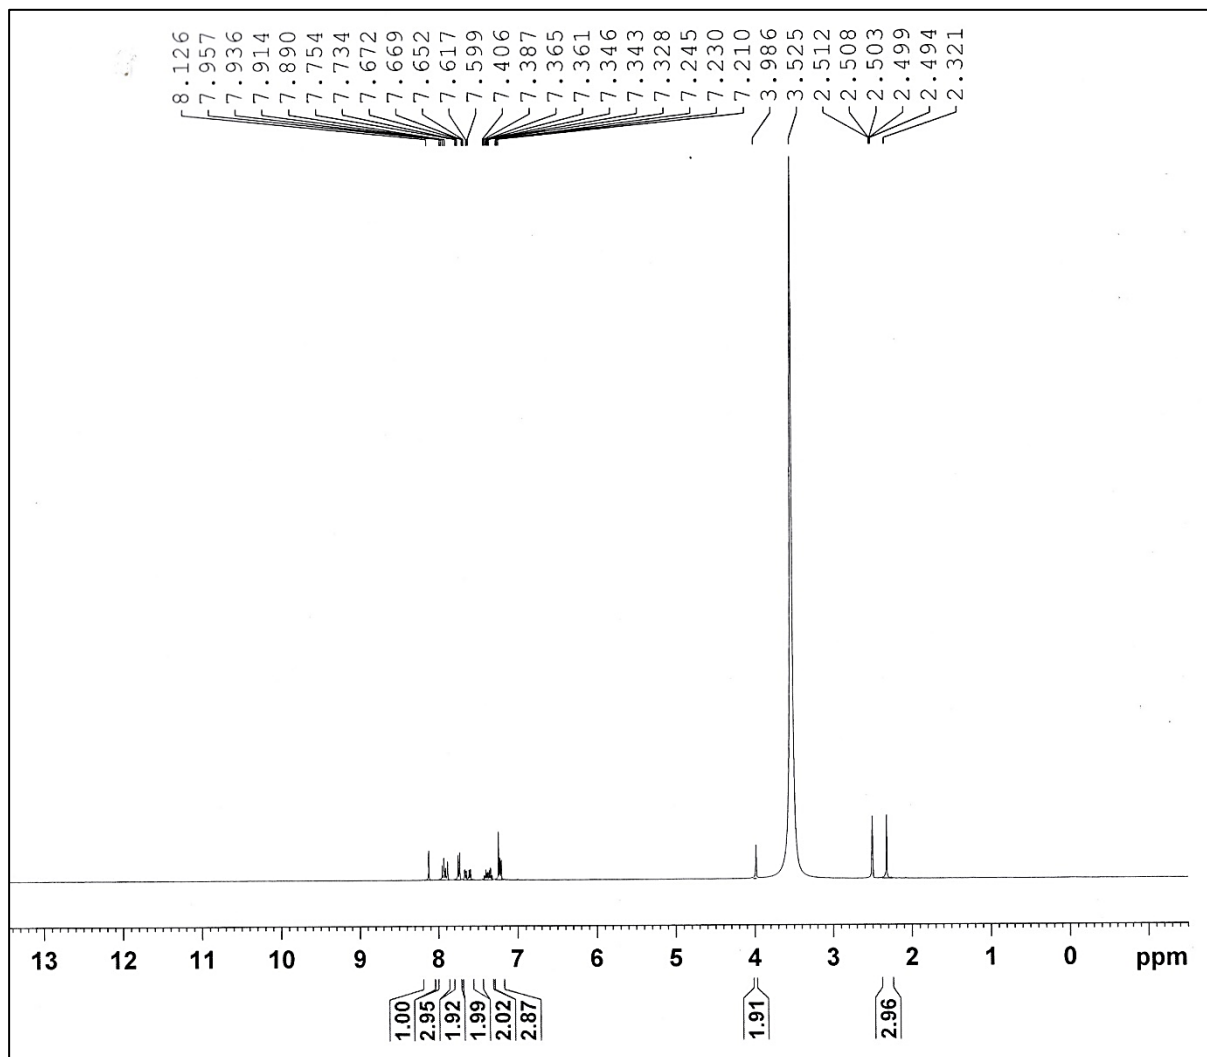

Fig. S29.  $^1\text{H}$  NMR spectrum of **2h**.

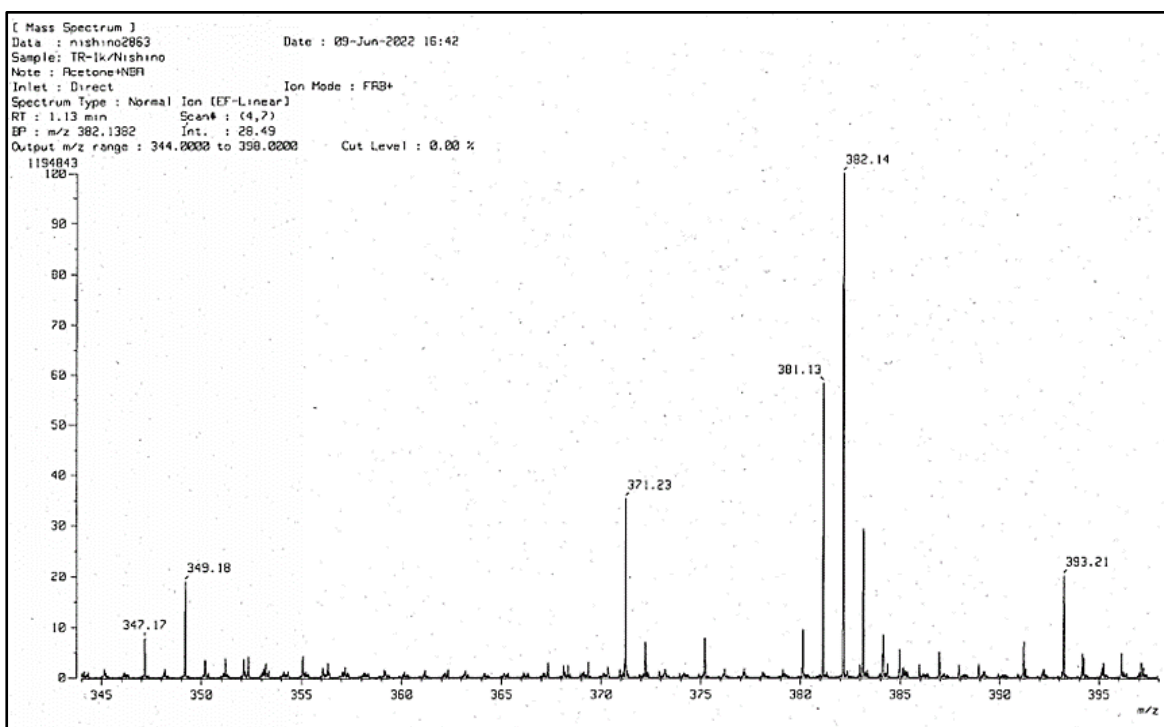

[ Elemental Composition ]  
 Date : 09-Jun-2022 16:42 Page: 1  
 Data : nishino2863  
 Sample: TR-1k/Nishino  
 Note : Acetone+NBA  
 Inlet : Direct Ion Mode : FAB+  
 RT : 1.13 min Scan# : (4,7)  
 Elements : C 100/0, H 100/0, N 4/2, S 2/0  
 Mass Tolerance : 20ppm, 10mmu if m/z < 500, 20mmu if m/z > 1000  
 Unsaturation (U.S.) : -0.5 - 50.0

| Observed m/z | Int%  | Err [ppm / mmu] | U.S. | Composition       |
|--------------|-------|-----------------|------|-------------------|
| 382.1382     | 100.0 | -23.1 / -8.8    | 21.0 | C 28 H 18 N 2     |
|              |       | +9.8 / +3.8     | 21.5 | C 27 H 16 N 3     |
|              |       | +1.0 / +0.4     | 17.5 | C 24 H 20 N 3 S   |
|              |       | -7.8 / -3.0     | 13.5 | C 21 H 24 N 3 S 2 |
|              |       | +25.1 / +9.6    | 14.0 | C 20 H 22 N 4 S 2 |

**Fig. S30.** HRMS spectrum of **2h**.

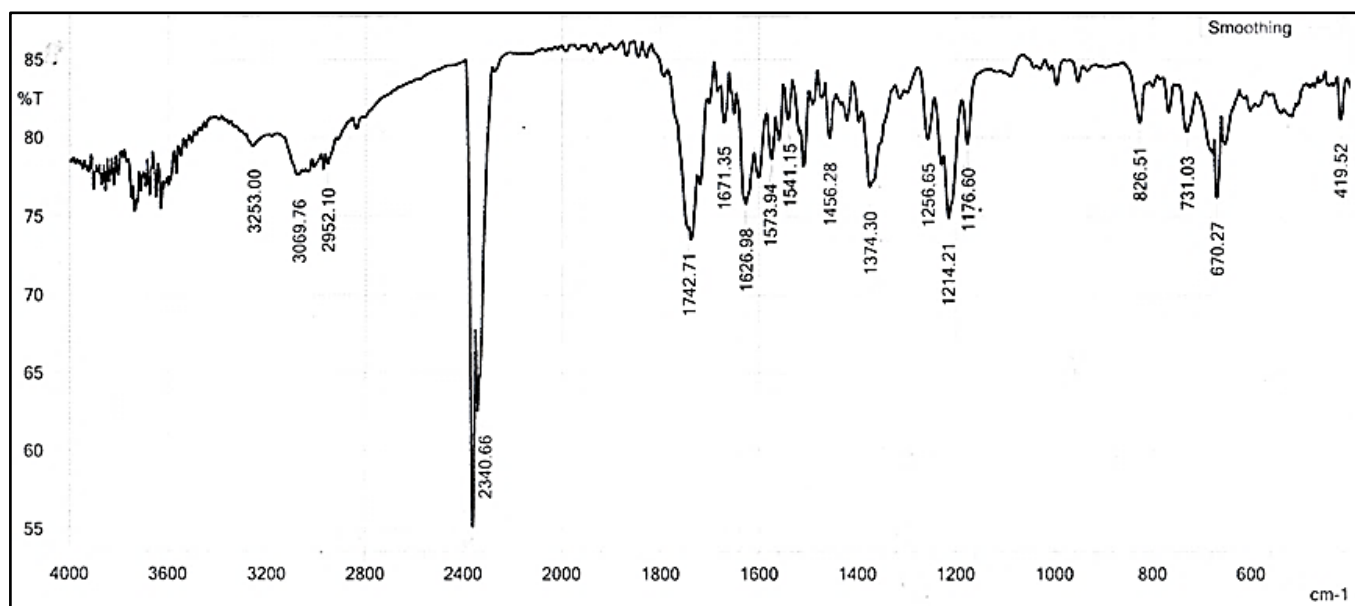

Fig. S31. IR spectrum of 2i.



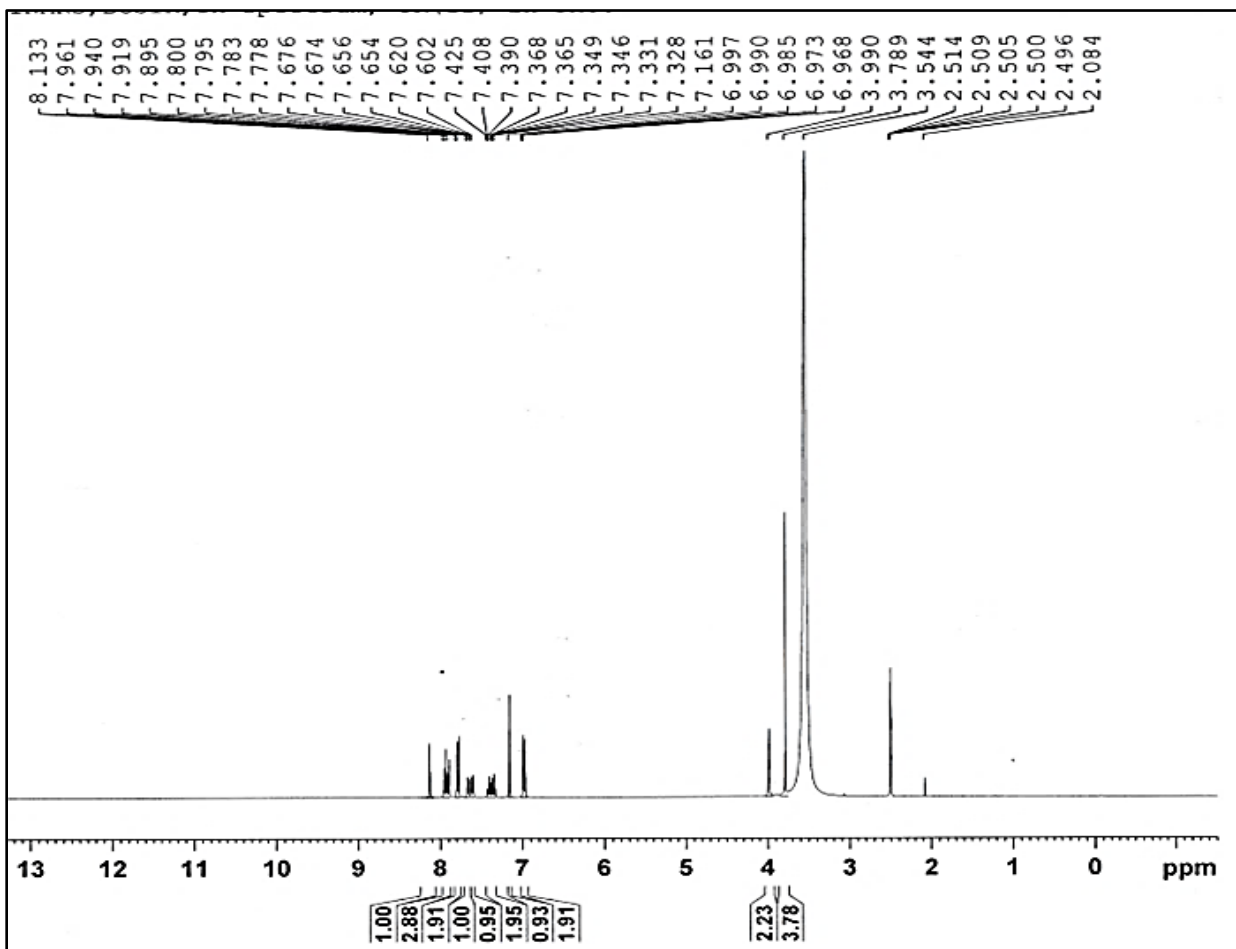

Fig. S32.  $^1\text{H}$  NMR spectrum of **2i**.

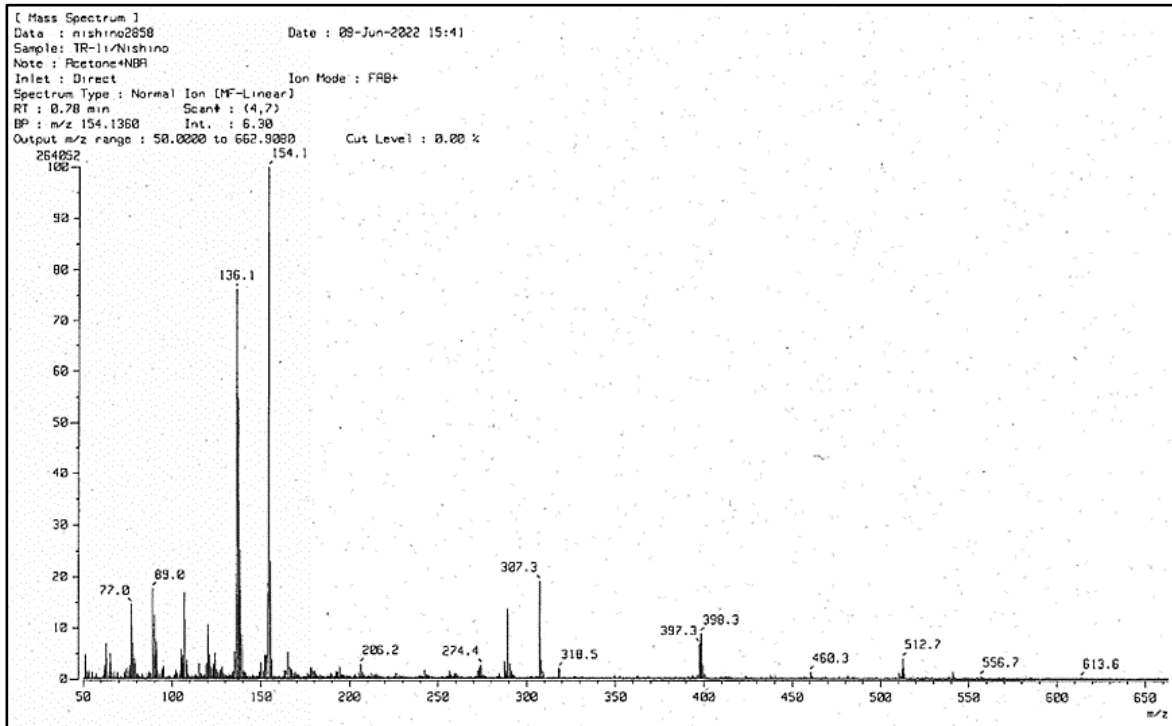

[ Elemental Composition ] Page: 1  
 Date : 09-Jun-2022 15:48  
 Data : nishino2859  
 Sample: TR-1i/Nishino  
 Note : Acetone+NBA  
 Inlet : Direct Ion Mode : FAB+  
 RT : 1.38 min Scan#: (4,9)  
 Elements : C 100/0, H 100/0, O 2/0, N 4/2, S 2/0  
 Mass Tolerance : 20ppm, 10mmu if m/z < 500, 20mmu if m/z > 1000  
 Unsaturation (U.S.) : -0.5 - 50.0

| Observed m/z | Int% | Err [ppm / mmu] | U.S. | Composition         |
|--------------|------|-----------------|------|---------------------|
| 398.1311     | 50.6 | +4.4 / +1.7     | 21.5 | C 27 H 16 O N 3     |
|              |      | -4.1 / -1.6     | 17.5 | C 24 H 20 O N 3 S   |
|              |      | -12.6 / -5.0    | 13.5 | C 21 H 24 O N 3 S 2 |
|              |      | +19.0 / +7.6    | 14.0 | C 20 H 22 O N 4 S 2 |

Fig. S33. HRMS spectrum of 2i.

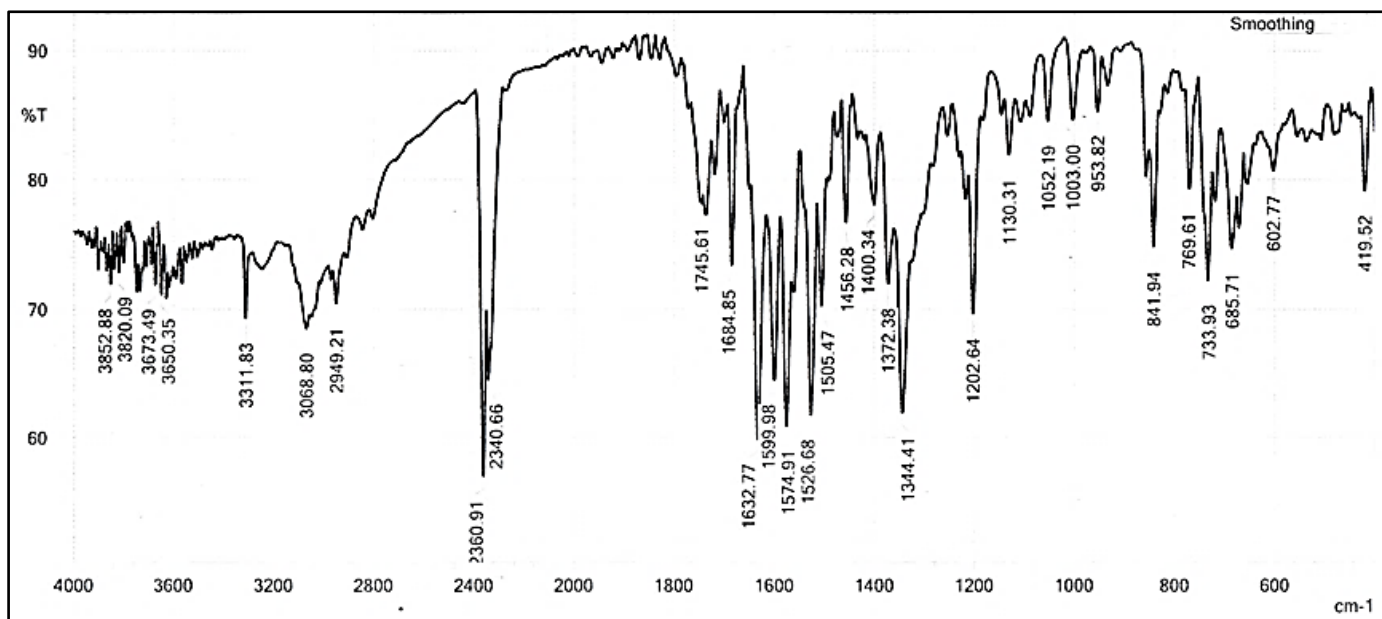

Fig. S34. IR spectrum of 2j.

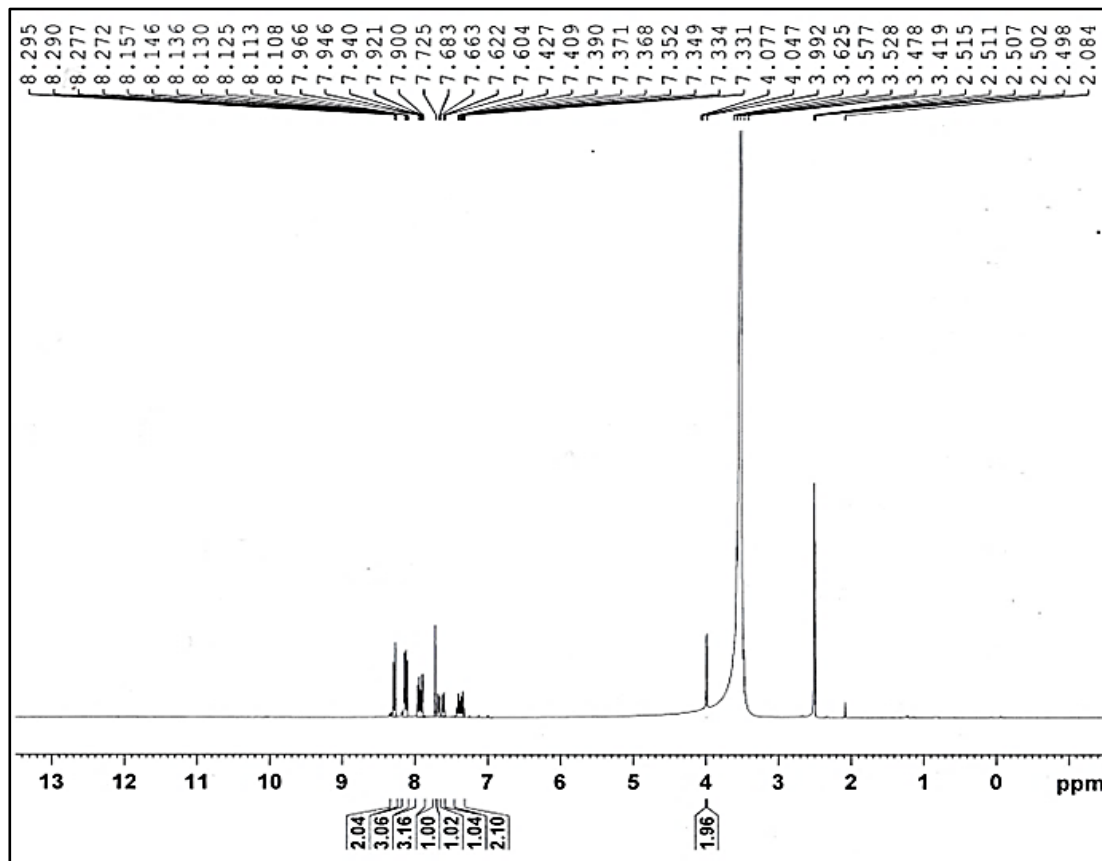

Fig. S35.  $^1\text{H}$  NMR spectrum of **2j**.

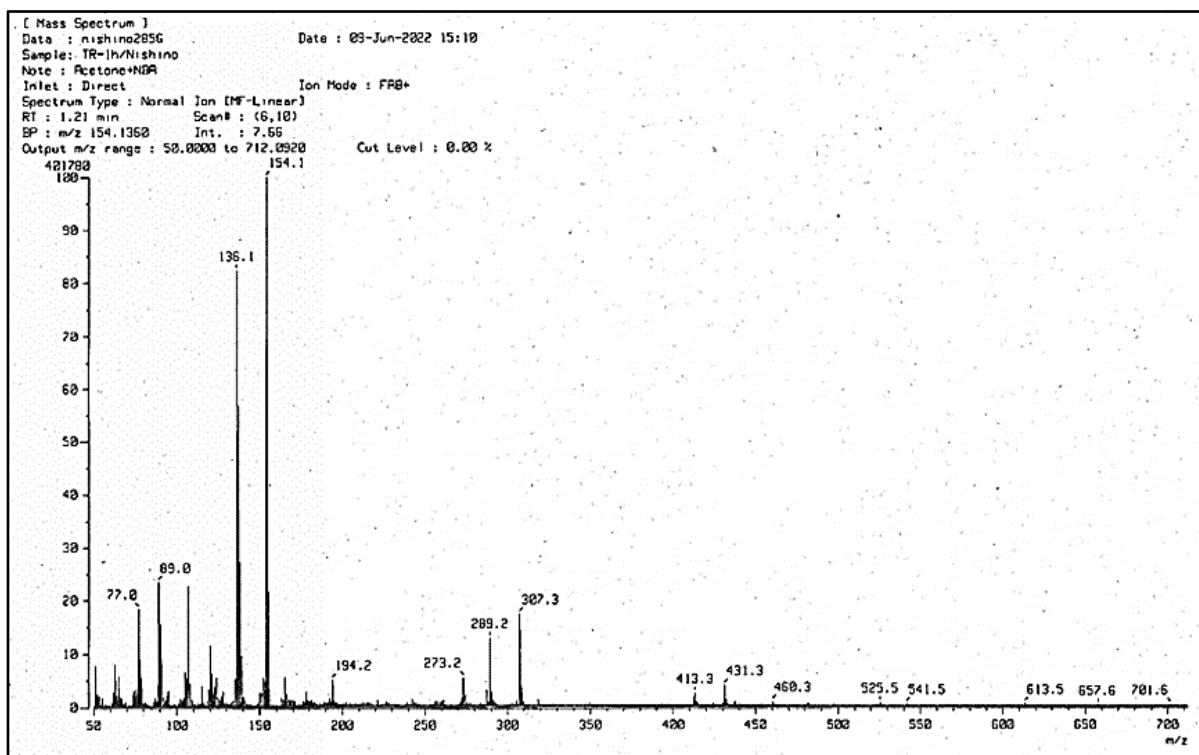

[ Elemental Composition ]  
 Date : 09-Jun-2022 15:19 Page: 1  
 Data : nishino2857  
 Sample: TR-1h/Nishino  
 Note : Acetone+NBA  
 Inlet : Direct Ion Mode : FAB+  
 RT : 2.50 min Scan# : (9,13)  
 Elements : C 100/0, H 100/0, O 3/1, N 5/3, S 2/0  
 Mass Tolerance : 20ppm, 10mmu if m/z < 500, 20mmu if m/z > 1000  
 Unsaturation (U.S.) : -0.5 - 50.0

| Observed m/z | Int% | Err [ppm / mmu] | U.S. | Composition           |
|--------------|------|-----------------|------|-----------------------|
| 413.1068     | 22.0 | -23.3 / -9.6    | 22.0 | C 27 H 15 O 2 N 3     |
|              |      | +7.1 / +2.9     | 22.5 | C 26 H 13 O 2 N 4     |
|              |      | -1.1 / -0.4     | 18.5 | C 23 H 17 O 2 N 4 S   |
|              |      | -9.2 / -3.8     | 14.5 | C 20 H 21 O 2 N 4 S 2 |
|              |      | +21.2 / +8.8    | 15.0 | C 19 H 19 O 2 N 5 S 2 |

Fig. S36. HRMS spectrum of 2j.

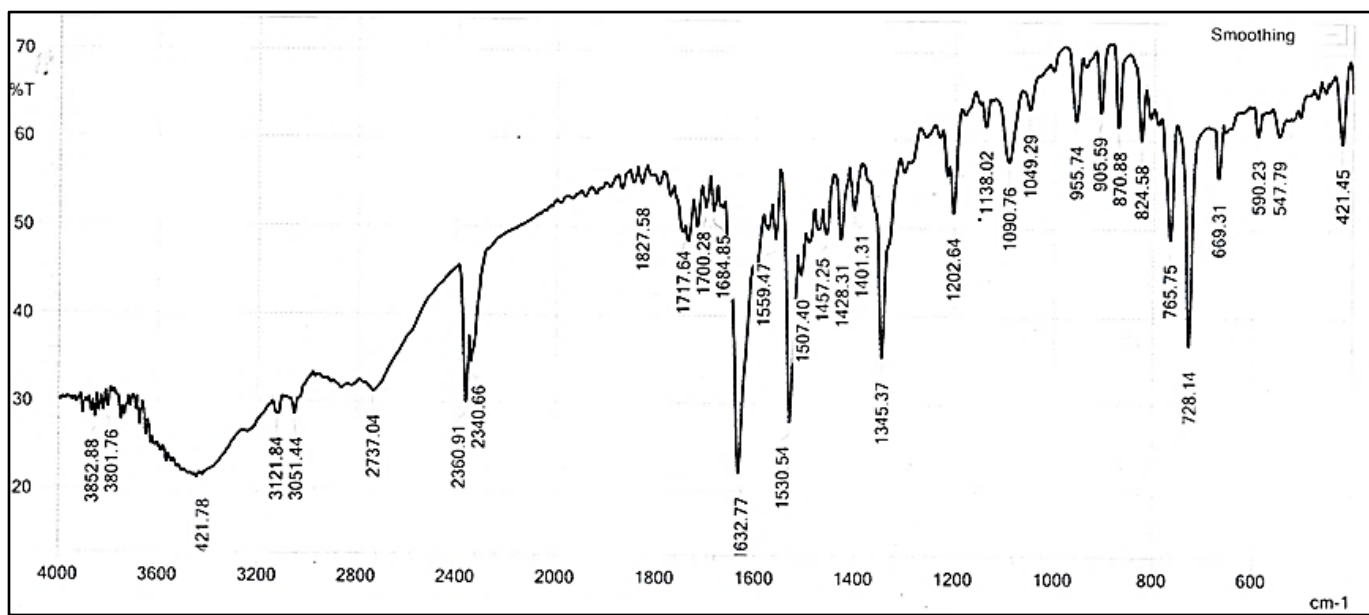

Fig. S37. IR spectrum of 2k.

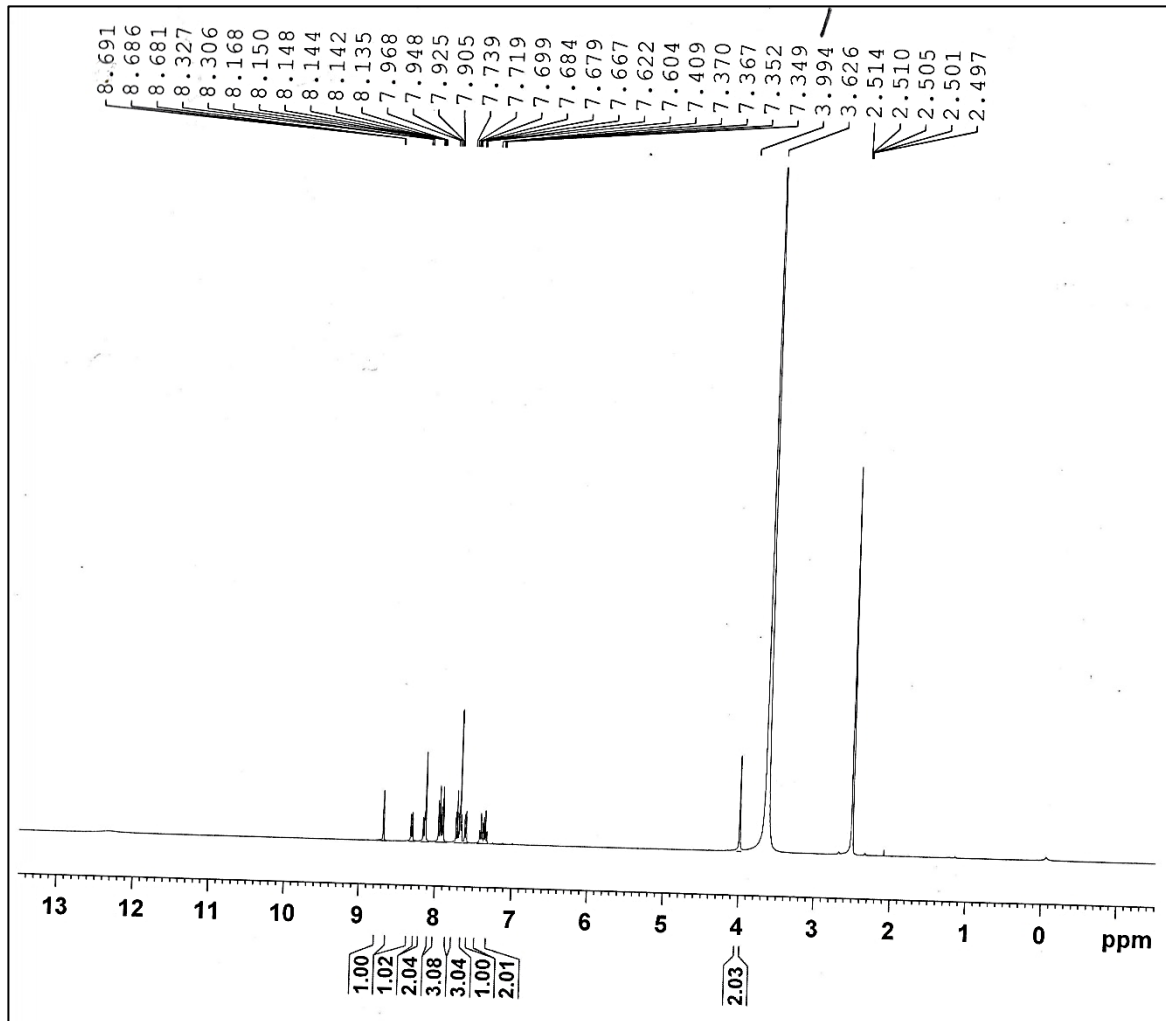

Fig. S38.  $^1\text{H}$  NMR spectrum of **2k**.

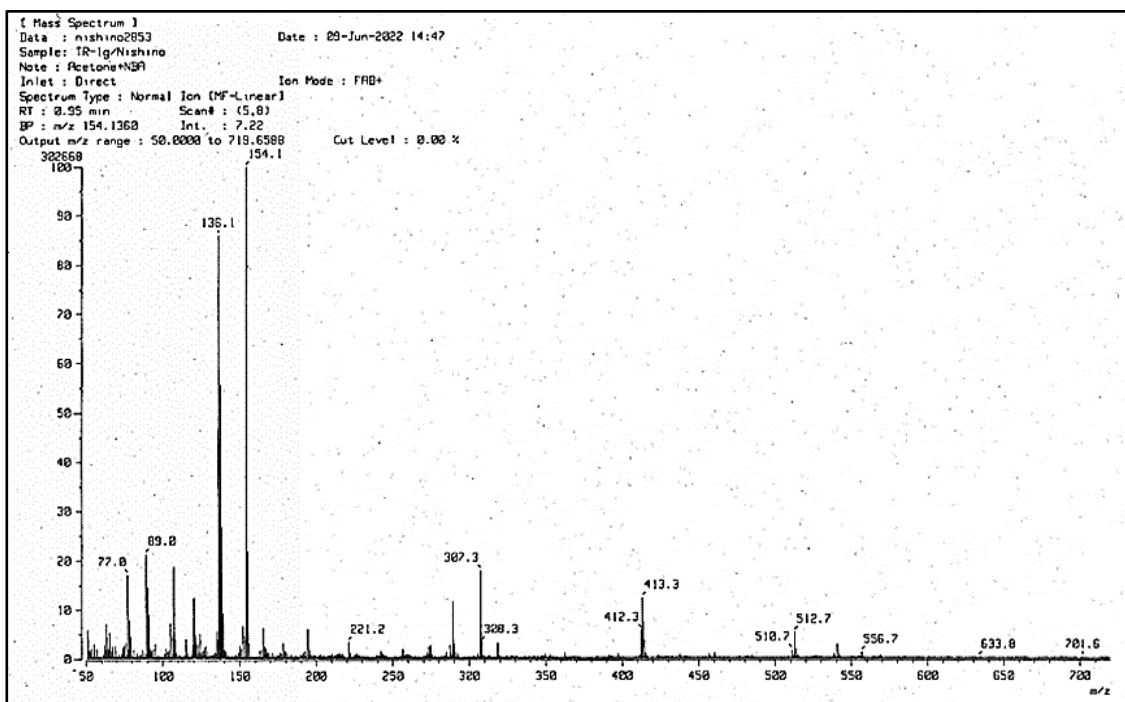

[ Elemental Composition ] Page: 1  
 Date : 09-Jun-2022 14:55  
 Data : nishino2854  
 Sample: TR-1g/Nishino  
 Note : Acetone+NBA  
 Inlet : Direct Ion Mode : FAB+  
 RT : 1.38 min Scan# : (5,8)  
 Elements : C 100/0, H 100/0, O 3/1, N 5/3, S 2/0  
 Mass Tolerance : 20ppm, 10mmu if m/z < 500, 20mmu if m/z > 1000  
 Unsaturation (U.S.) : -0.5 - 50.0

| Observed m/z | Int%  | Err[ppm / mmu] | U.S. Composition           |
|--------------|-------|----------------|----------------------------|
| 413.1080     | 100.0 | -20.3 / -8.4   | 22.0 C 27 H 15 O 2 N 3     |
|              |       | +10.1 / +4.2   | 22.5 C 26 H 13 O 2 N 4     |
|              |       | +2.0 / +0.8    | 18.5 C 23 H 17 O 2 N 4 S   |
|              |       | -6.2 / -2.6    | 14.5 C 20 H 21 O 2 N 4 S 2 |

Fig. S39. HRMS spectrum of 2k.



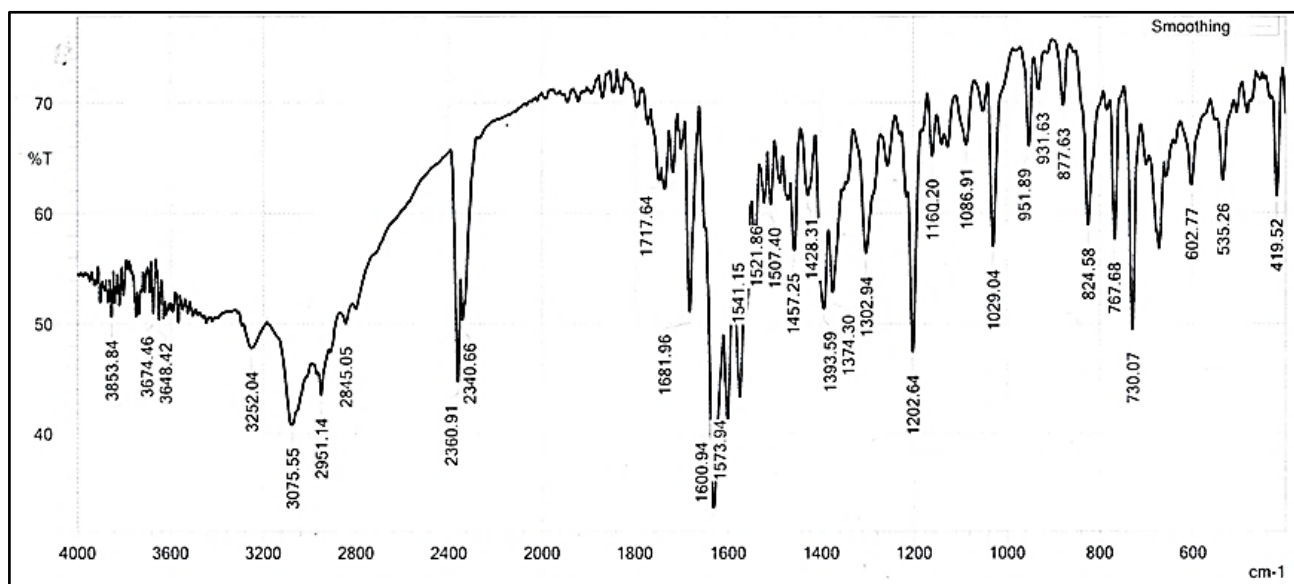

**Fig. S40.** IR spectrum of **2l**.

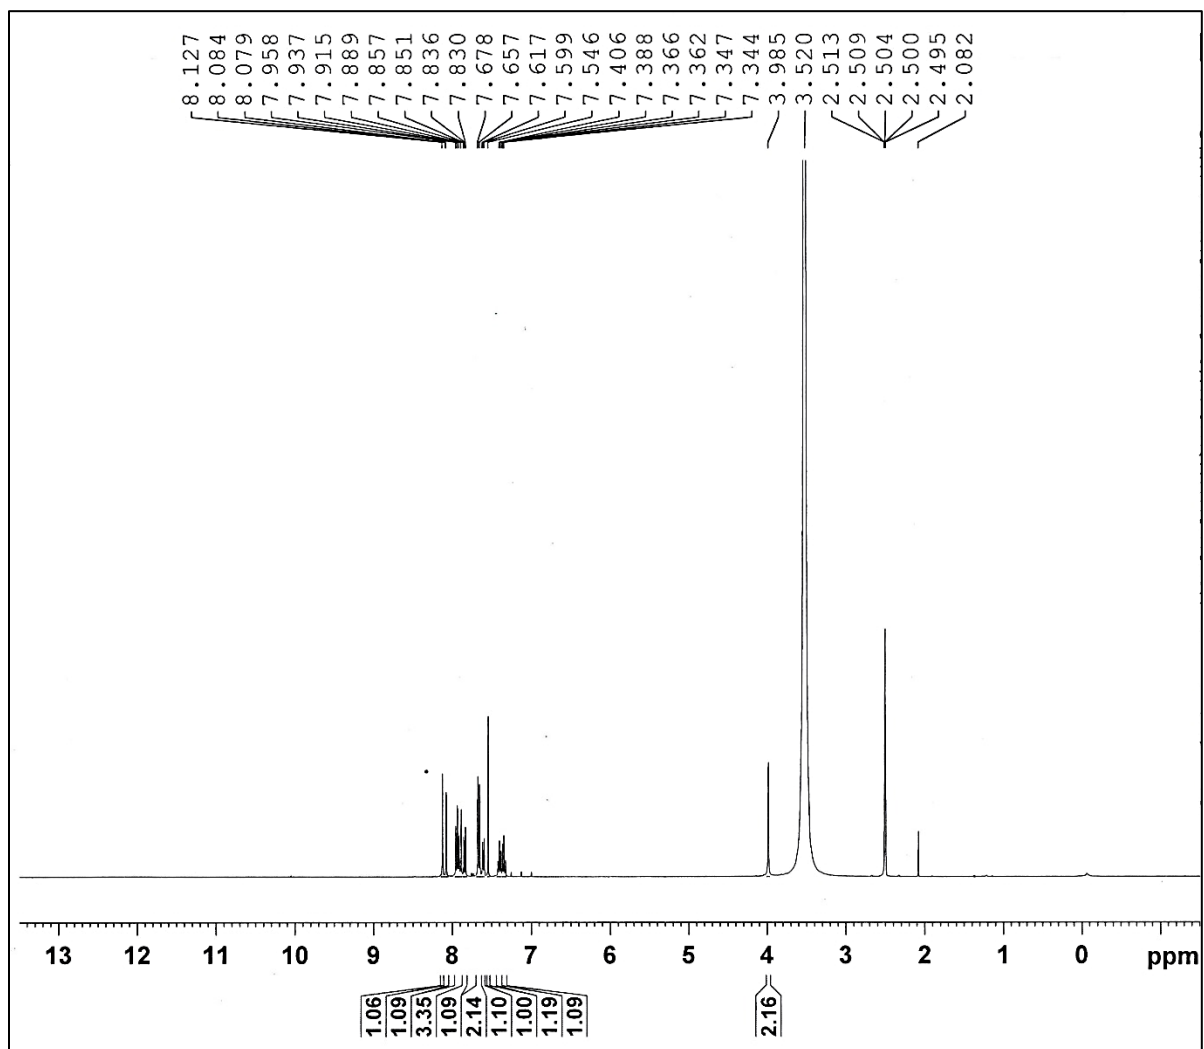

Fig. S41.  $^1\text{H}$  NMR spectrum of **2l**.

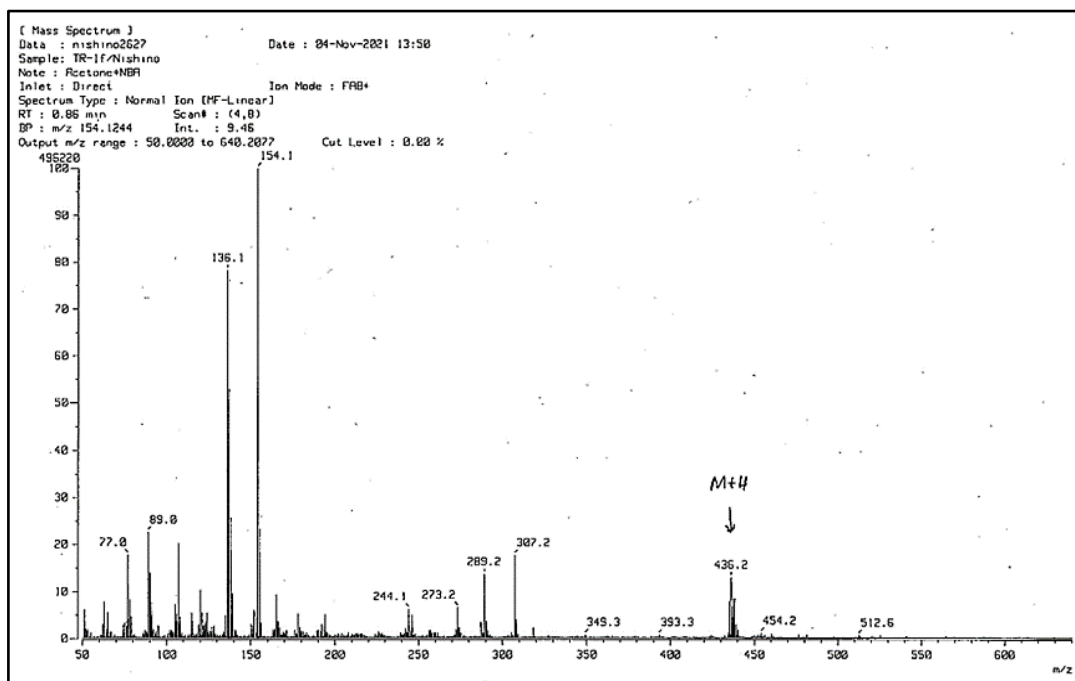

[ Elemental Composition ]  
 Date : 04-Nov-2021 14:41 Page: 1  
 Data : nishino2631  
 Sample: TR-1f/Nishino  
 Note : Acetone+NBA  
 Inlet : Direct Ion Mode : FAB+  
 RT : 1.50 min Scan# : (5,9)  
 Elements : C 100/0, H 100/0, N 4/2, Cl 3/1, S 2/0  
 Mass Tolerance : 20ppm, 10mmu if m/z < 500, 20mmu if m/z > 1000  
 Unsaturation (U.S.) : -0.5 - 50.0

| Observed m/z | Int%  | Err [ppm / mmu] | U.S. | Composition            |
|--------------|-------|-----------------|------|------------------------|
| 435.0366     | 95.6  | -16.4 / -7.1    | 26.5 | C 28 H 8 N 4 Cl        |
|              |       | -20.6 / -9.0    | 21.5 | C 27 H 13 N 2 Cl 2     |
|              |       | +8.3 / +3.6     | 22.0 | C 26 H 11 N 3 Cl 2     |
|              |       | +0.6 / +0.2     | 18.0 | C 23 H 15 N 3 Cl 2 S   |
|              |       | -7.2 / -3.1     | 14.0 | C 20 H 19 N 3 Cl 2 S 2 |
|              |       | +21.7 / +9.5    | 14.5 | C 19 H 17 N 4 Cl 2 S 2 |
|              |       | +17.5 / +7.6    | 9.5  | C 18 H 22 N 2 Cl 3 S 2 |
| 436.0420     | 100.0 | -22.0 / -9.6    | 26.0 | C 28 H 9 N 4 Cl        |
|              |       | +2.7 / +1.2     | 21.5 | C 26 H 12 N 3 Cl 2     |
|              |       | -5.1 / -2.2     | 17.5 | C 23 H 16 N 3 Cl 2 S   |
|              |       | +19.6 / +8.5    | 13.0 | C 21 H 19 N 2 Cl 3 S   |
|              |       | -12.8 / -5.6    | 13.5 | C 20 H 20 N 3 Cl 2 S 2 |
|              |       | +16.0 / +7.0    | 14.0 | C 19 H 18 N 4 Cl 2 S 2 |
|              |       | +11.8 / +5.2    | 9.0  | C 18 H 23 N 2 Cl 3 S 2 |

Fig. S42. HRMS spectrum of 2l

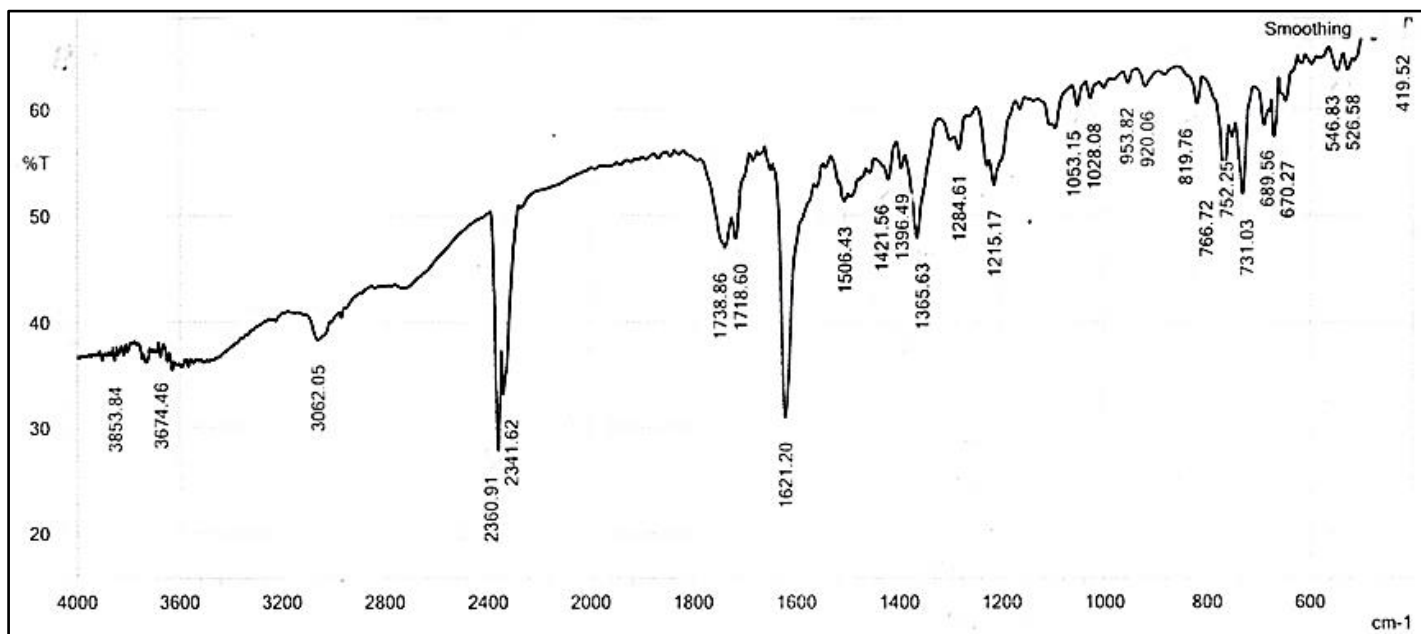

Fig. S43. IR spectrum of 2m.

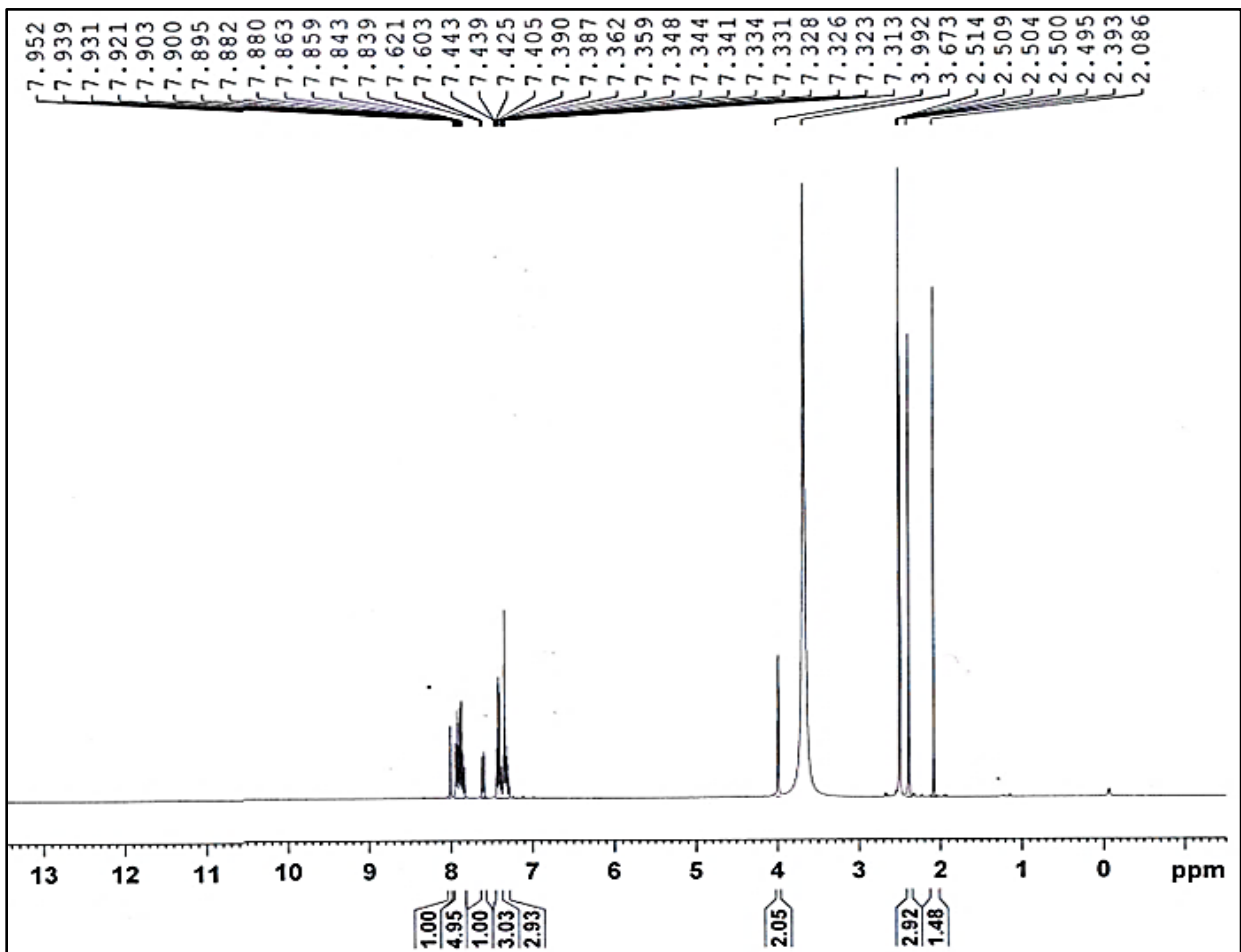

Fig. S44.  $^1\text{H}$  NMR spectrum of **2m**.

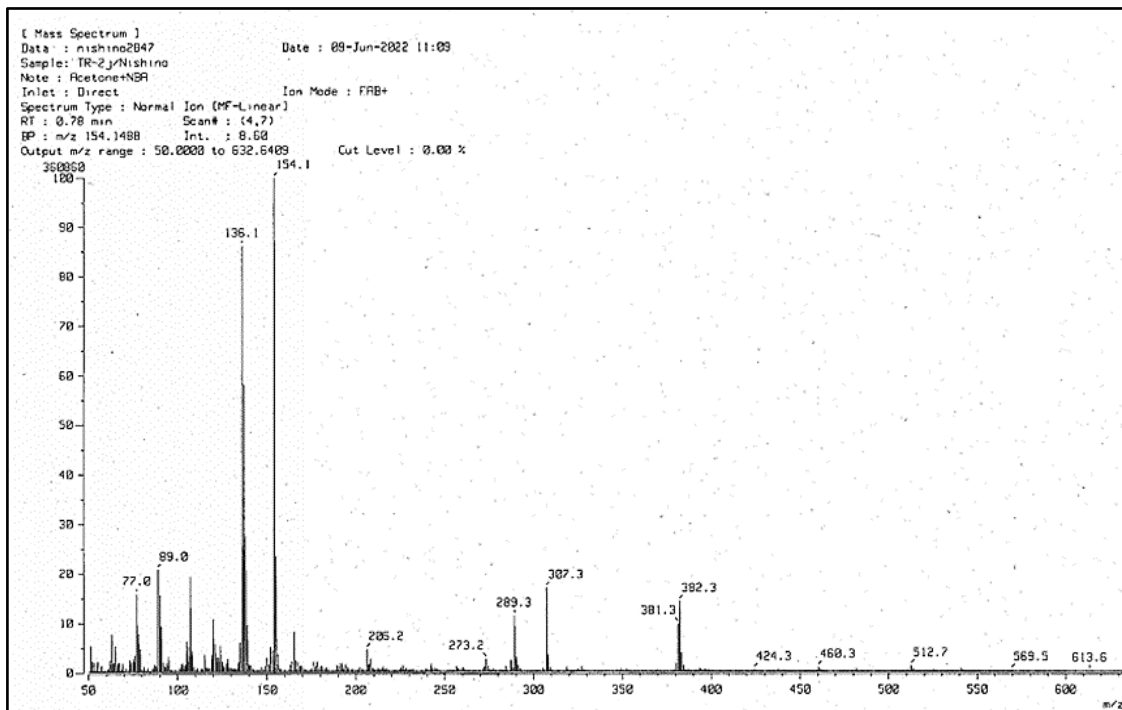

[ Elemental Composition ]  
 Date : 09-Jun-2022 11:18 Page: 1  
 Data : nishino2848  
 Sample: TR-2j/Nishino  
 Note : Acetone+NBA  
 Inlet : Direct Ion Mode : FAB+  
 RT : 1.38 min Scan# : (5,8)  
 Elements : C 100/0, H 100/0, N 4/2, S 2/0  
 Mass Tolerance : 20ppm, 10mmu if m/z < 500, 20mmu if m/z > 1000  
 Unsaturation (U.S.) : -0.5 - 50.0

| Observed m/z | Int% | Err [ppm / mmu] | U.S. | Composition       |
|--------------|------|-----------------|------|-------------------|
| 381.1304     | 75.4 | -23.1 / -8.8    | 21.5 | C 28 H 17 N 2     |
|              |      | +9.9 / +3.8     | 22.0 | C 27 H 15 N 3     |
|              |      | +1.1 / +0.4     | 18.0 | C 24 H 19 N 3 S   |
|              |      | -7.8 / -3.0     | 14.0 | C 21 H 23 N 3 S 2 |
|              |      | +25.2 / +9.6    | 14.5 | C 20 H 21 N 4 S 2 |

Fig. S45. HRMS spectrum of **2m**.

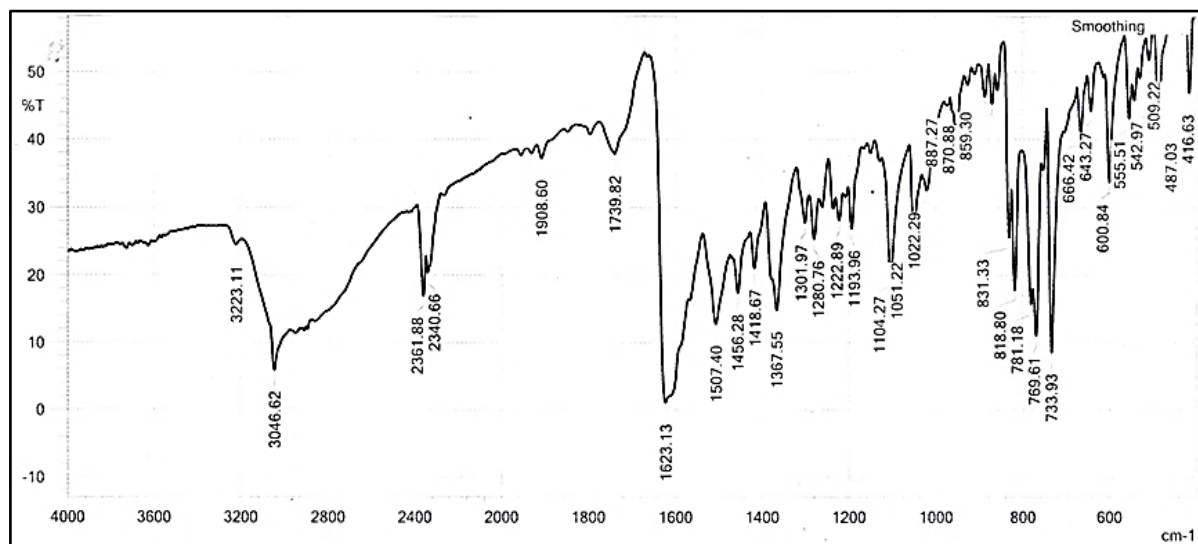

Fig. S46. IR spectrum of 2n.

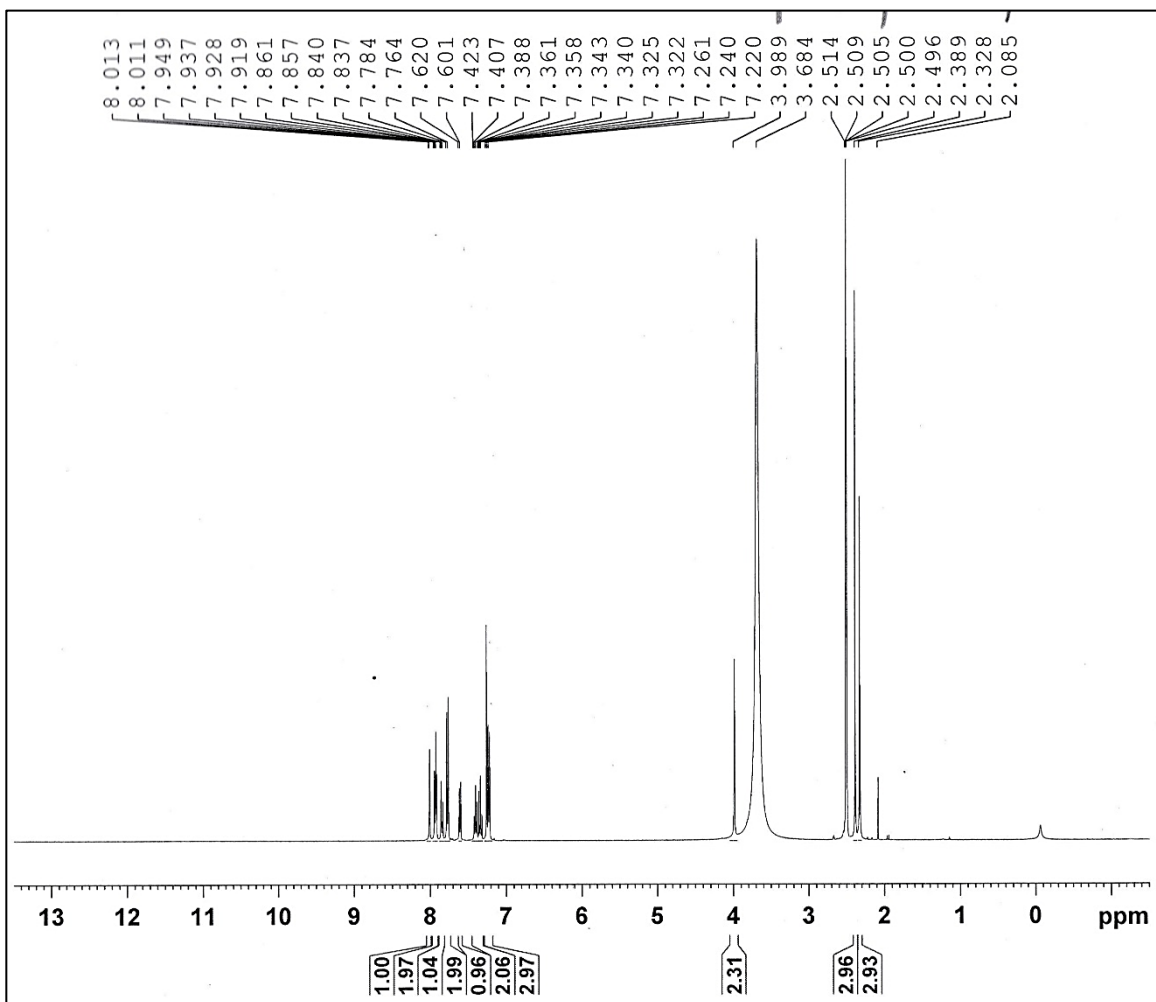

Fig. S47.  $^1\text{H}$  NMR spectrum of **2n**.



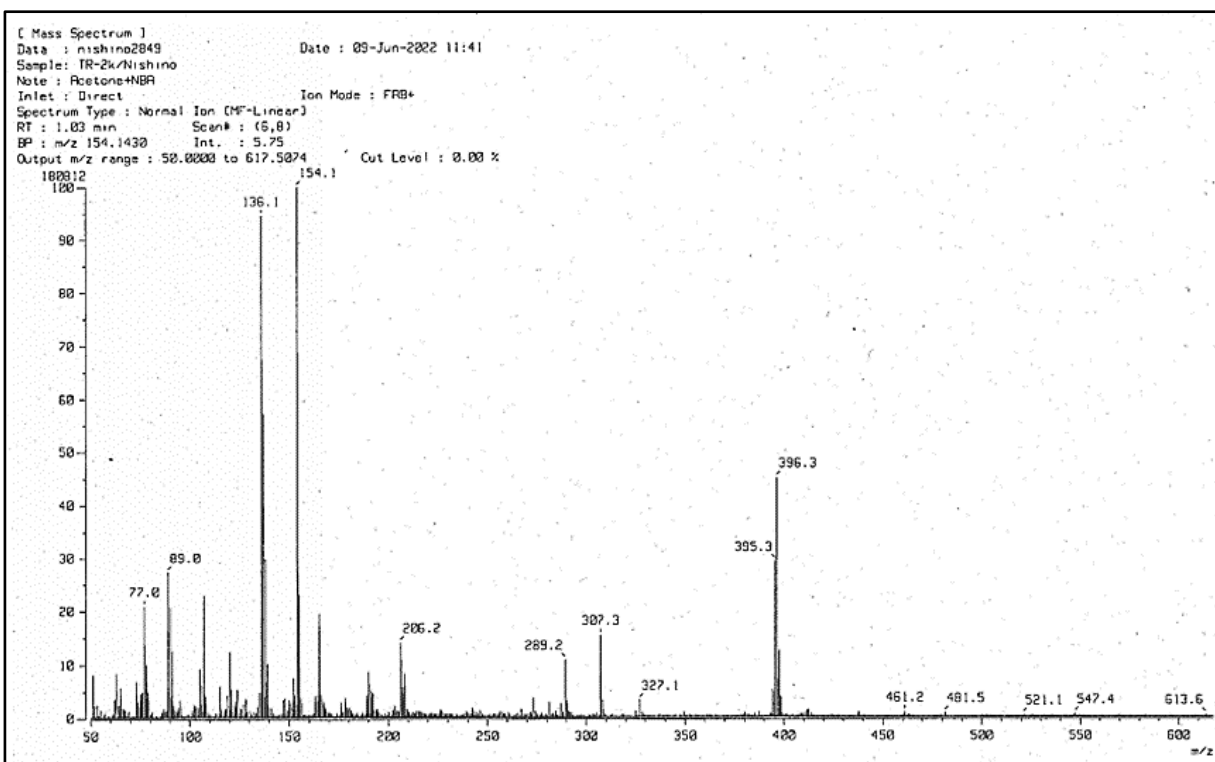

[ Elemental Composition ]  
 Date : 09-Jun-2022 11:49 Page: 1  
 Data : nishino2850  
 Sample: TR-2k/Nishino  
 Note : Acetone+NBA  
 Inlet : Direct Ion Mode : FAB+  
 RT : 1.25 min Scan#: (4,8)  
 Elements : C 100/0, H 100/0, N 4/2, S 2/0  
 Mass Tolerance : 20ppm, 10mmu if m/z < 500, 20mmu if m/z > 1000  
 Unsaturation (U.S.) : -0.5 - 50.0

| Observed m/z | Int%  | Err [ppm / mmu] | U.S. | Composition       |
|--------------|-------|-----------------|------|-------------------|
| 396.1518     | 100.0 | +4.3 / +1.7     | 21.5 | C 28 H 18 N 3     |
|              |       | -4.2 / -1.7     | 17.5 | C 25 H 22 N 3 S   |
|              |       | -12.7 / -5.0    | 13.5 | C 22 H 26 N 3 S 2 |
|              |       | +19.1 / +7.6    | 14.0 | C 21 H 24 N 4 S 2 |

Fig. S48. HRMS spectrum of 2n.

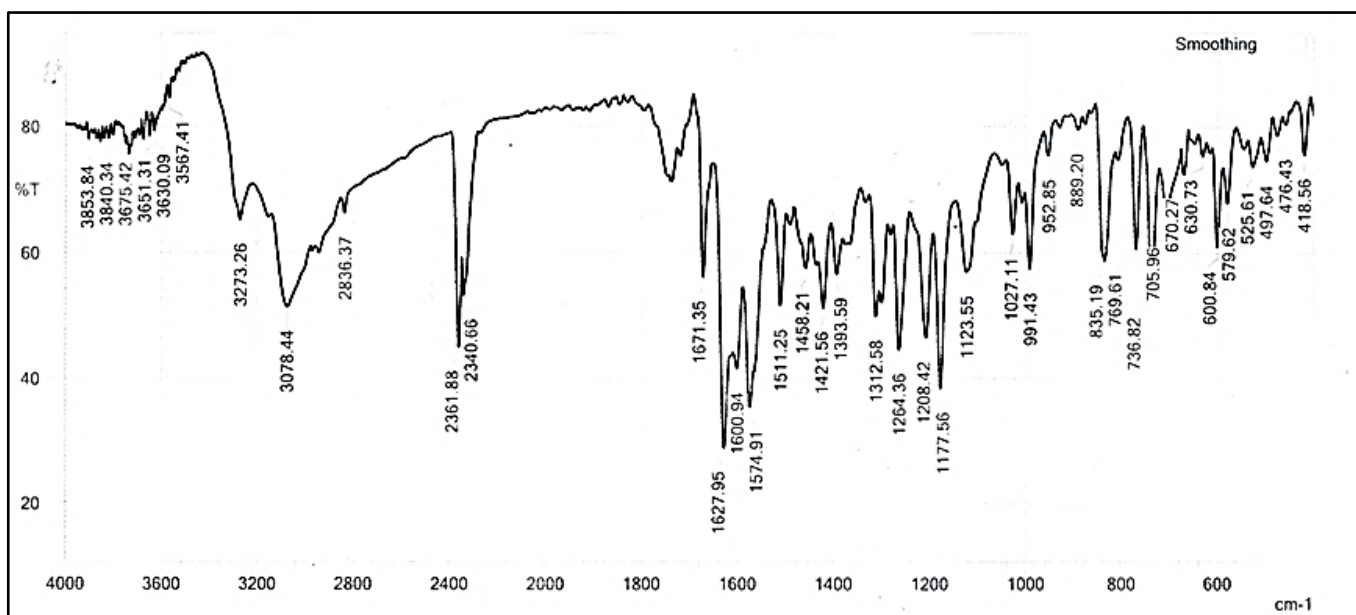

Fig. S49. IR spectrum of 20.

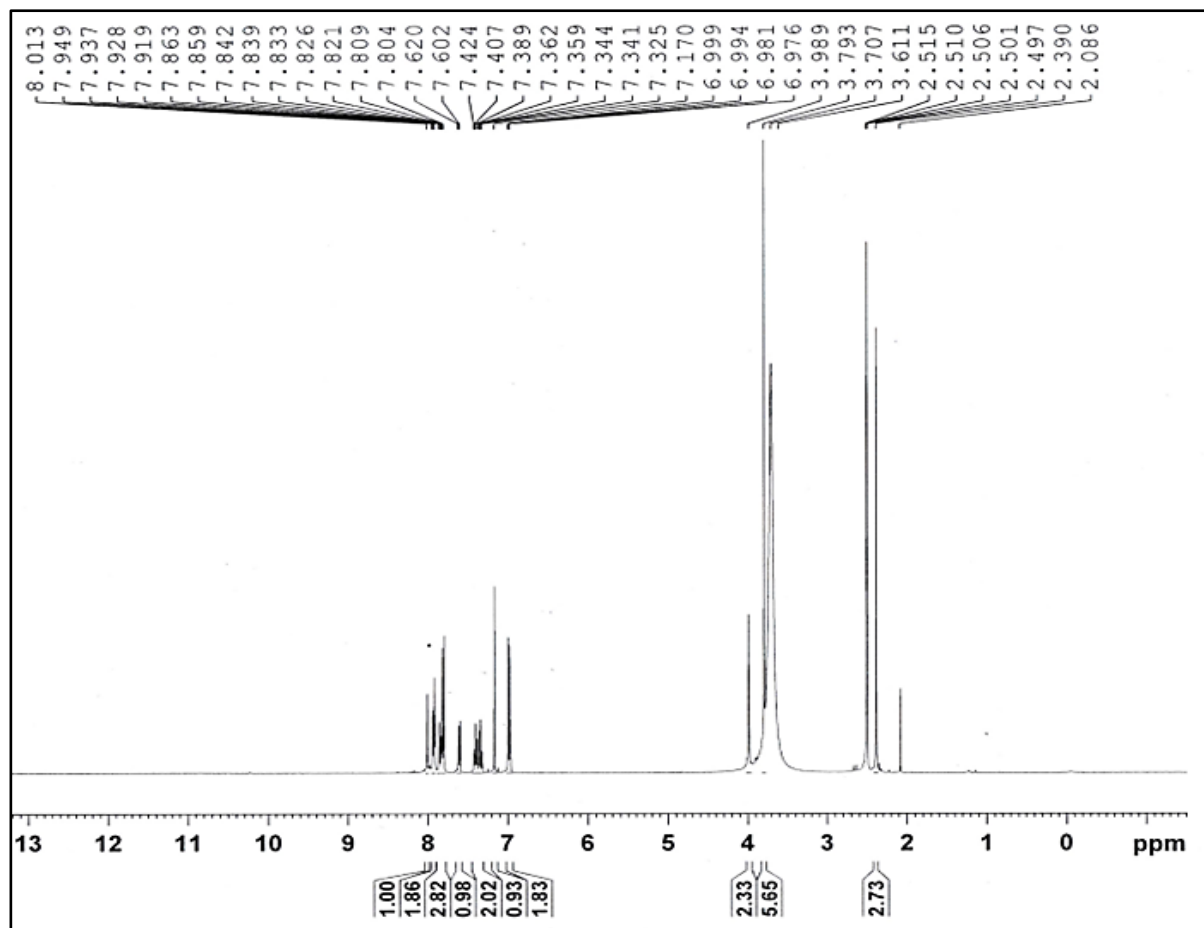

Fig. S50.  $^1\text{H}$  NMR spectrum of **2o**.

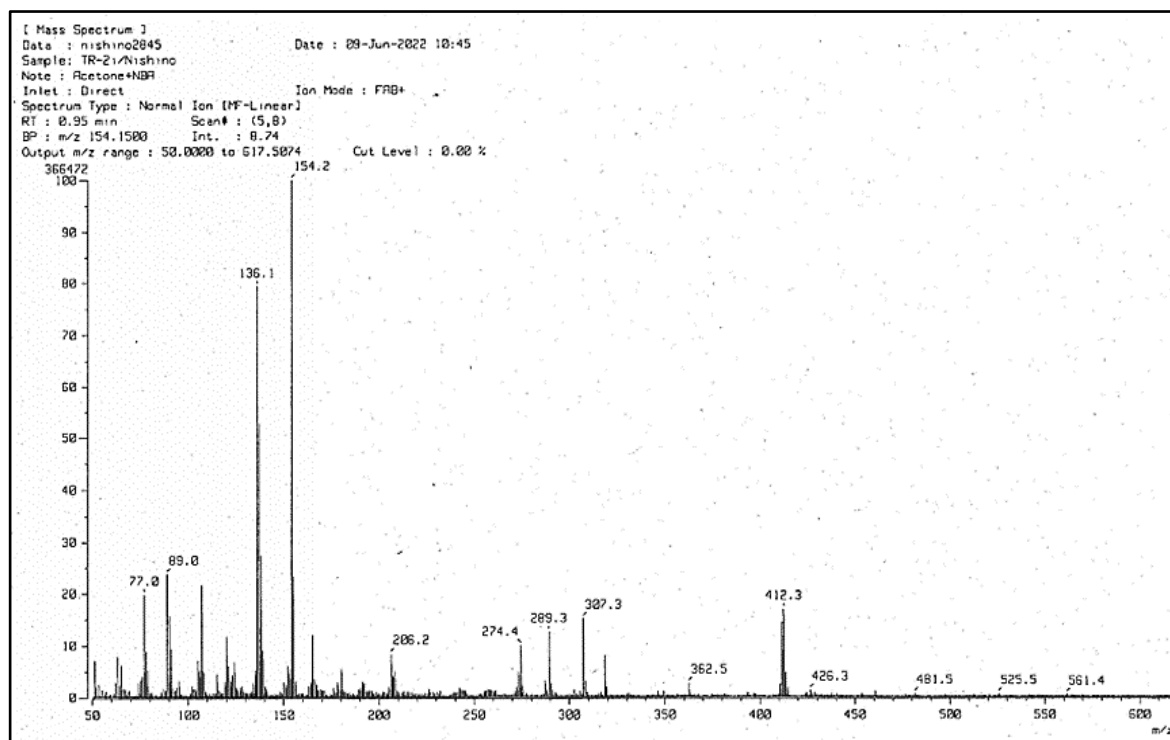

[ Elemental Composition ]  
 Date : 09-Jun-2022 10:53 Page: 1  
 Data : nishino2846  
 Sample: TR-2i/Nishino  
 Note : Acetone+NBA  
 Inlet : Direct Ion Mode : FAB+  
 RT : 1.38 min Scan#: (5,8)  
 Elements : C 100/0, H 100/0, O 2/0, N 4/2, S 2/0  
 Mass Tolerance : 20ppm, 10mmu if m/z < 500, 20mmu if m/z > 1000  
 Unsaturation (U.S.) : -0.5 - 50.0

| Observed m/z | Int% | Err [ppm / mmu] | U.S. | Composition         |
|--------------|------|-----------------|------|---------------------|
| 412.1470     | 85.2 | +5.0 / +2.0     | 21.5 | C 28 H 18 O N 3     |
|              |      | -3.2 / -1.3     | 17.5 | C 25 H 22 O N 3 S   |
|              |      | -11.4 / -4.7    | 13.5 | C 22 H 26 O N 3 S 2 |
|              |      | +19.1 / +7.9    | 14.0 | C 21 H 24 O N 4 S 2 |

Fig. S51. HRMS spectrum of 2o.

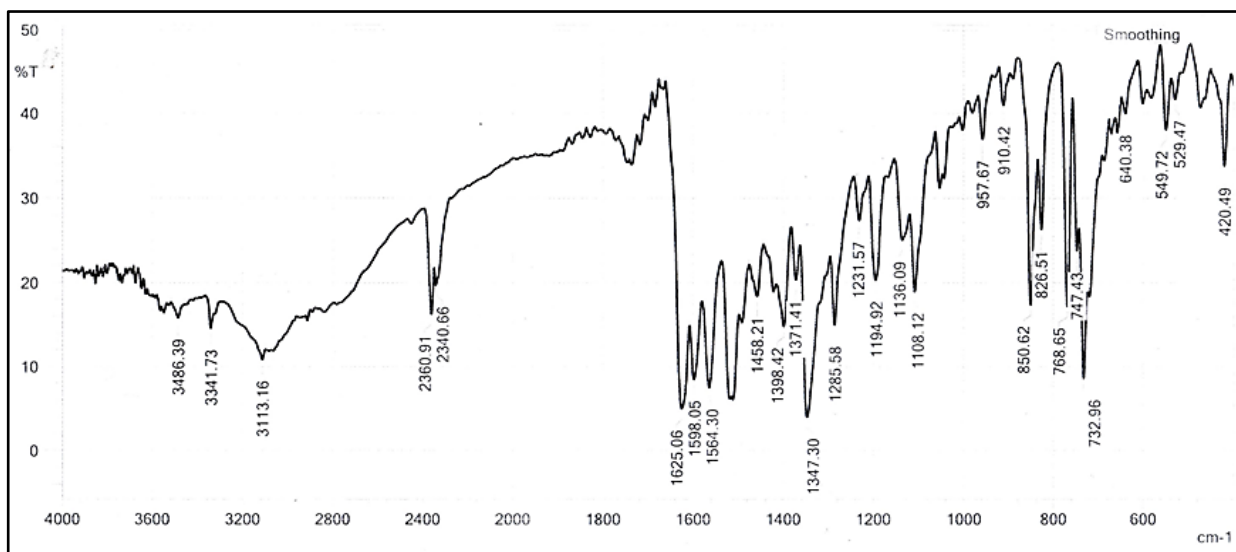

**Fig. S52.** IR spectrum of **2p**.

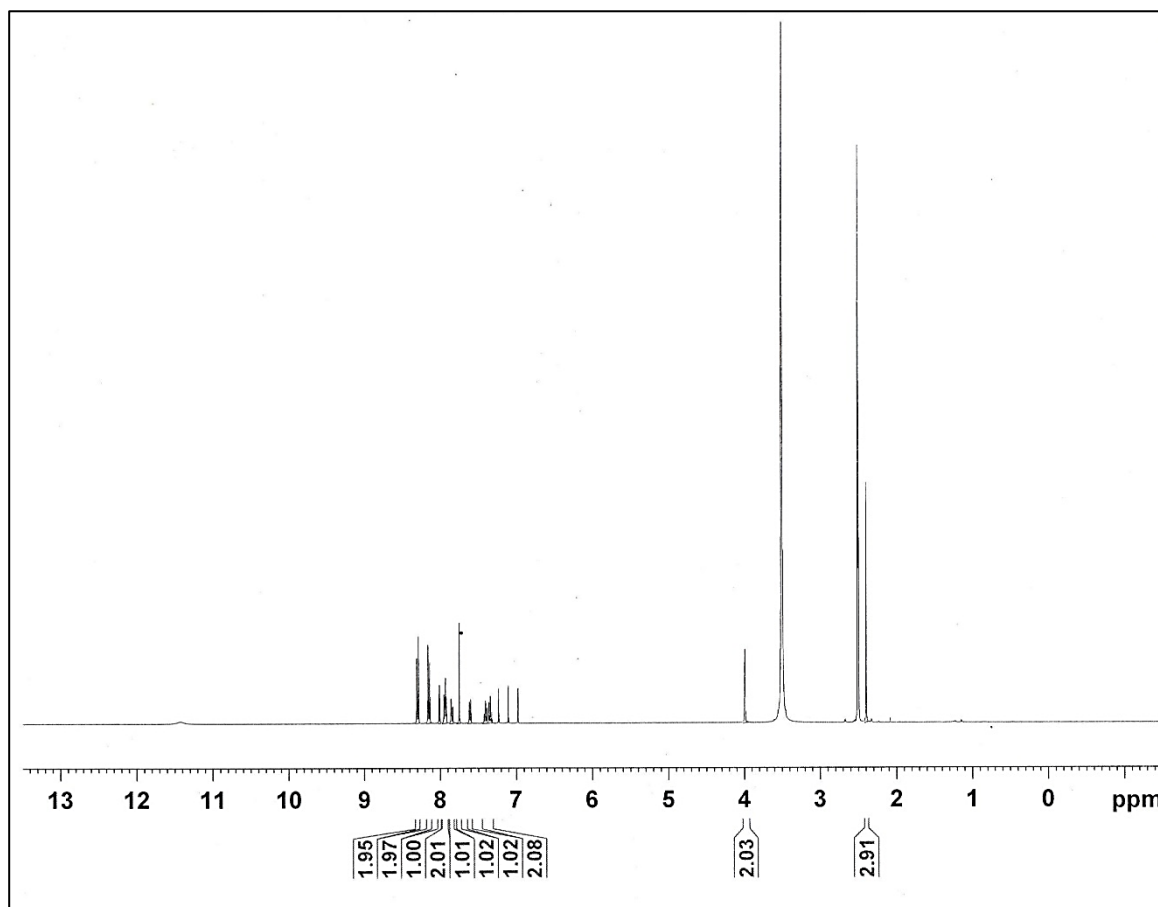

**Fig. S53.**  $^1\text{H}$  NMR spectrum of **2p**.

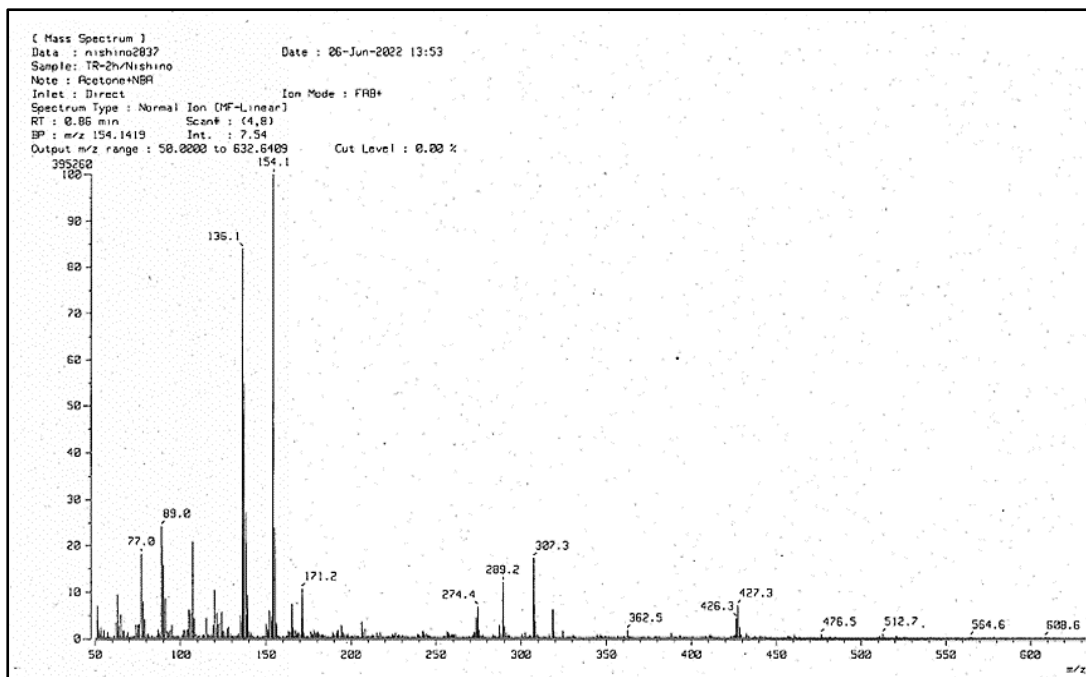

[ Elemental Composition ]  
 Date : 06-Jun-2022 14:11 Page: 1  
 Data : nishino2838  
 Sample: TR-2h/Nishino  
 Note : Acetone+NBA  
 Inlet : Direct Ion Mode : FAB+  
 RT : 1.75 min Scan# : (6,10)  
 Elements : C 100/0, H 100/0, O 3/1, N 5/3, S 2/0  
 Mass Tolerance : 20ppm, 10mmu if m/z < 500, 20mmu if m/z > 1000  
 Unsaturation (U.S.) : -0.5 - 50.0

| Observed m/z | Int% | Err [ppm / mmu] | U.S. Composition           |
|--------------|------|-----------------|----------------------------|
| 427.1233     | 43.9 | -20.5 / -8.8    | 22.0 C 28 H 17 O 2 N 3     |
|              |      | +8.9 / +3.8     | 22.5 C 27 H 15 O 2 N 4     |
|              |      | +1.1 / +0.4     | 18.5 C 24 H 19 O 2 N 4 S   |
|              |      | -6.8 / -2.9     | 14.5 C 21 H 23 O 2 N 4 S 2 |
|              |      | +22.6 / +9.7    | 15.0 C 20 H 21 O 2 N 5 S 2 |

Fig. S54. HRMS spectrum of 2p.

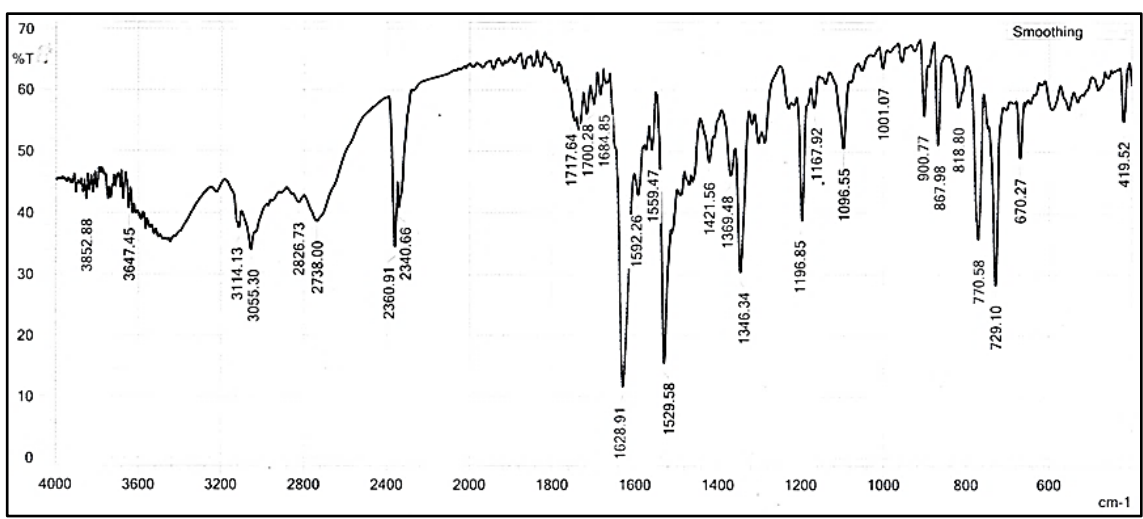

Fig. S55. IR spectrum of 2q.



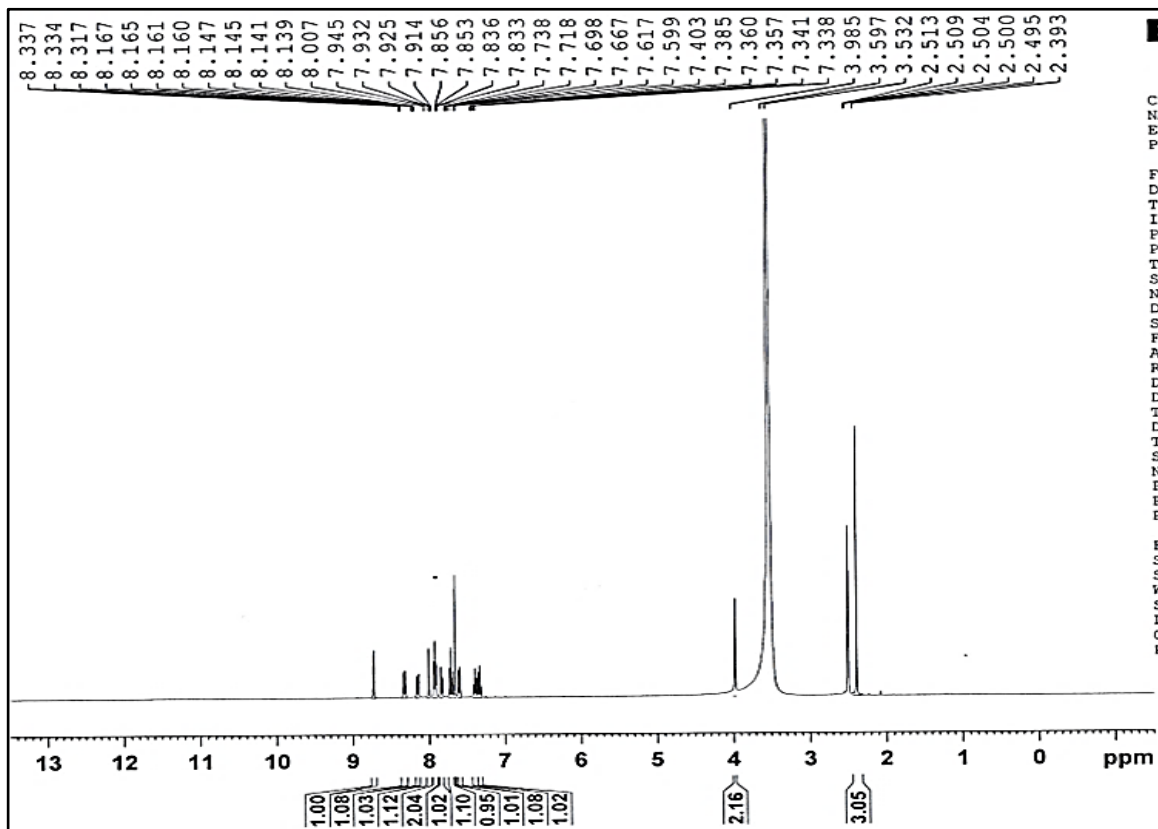

Fig. S56.  $^1\text{H}$  NMR spectrum of **2q**.

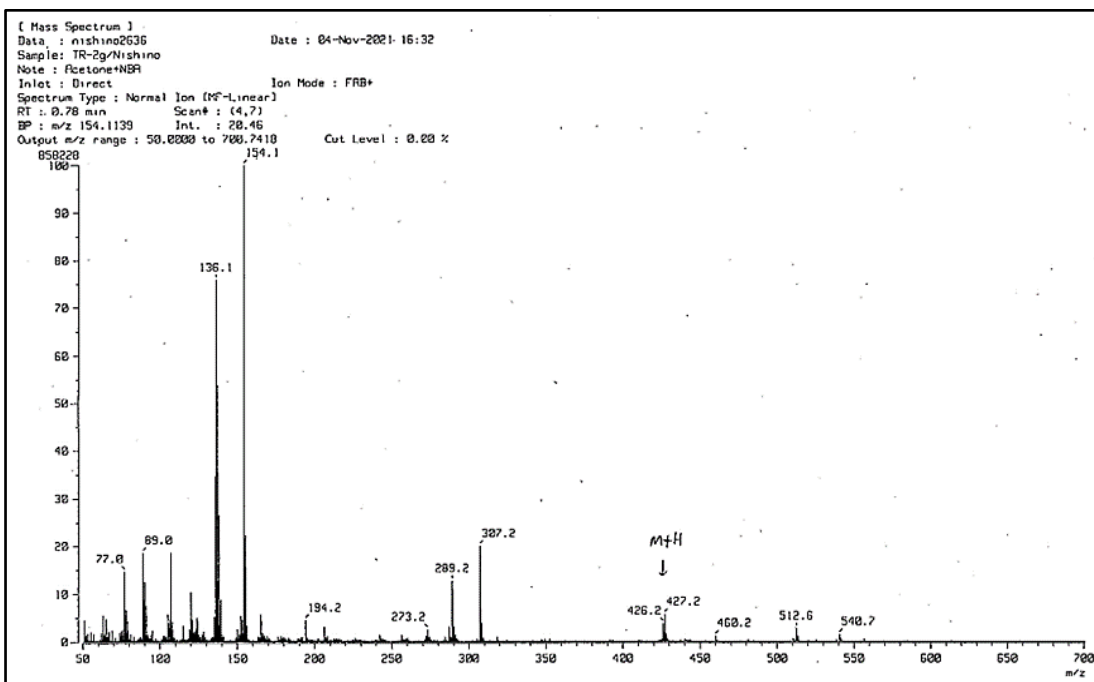

[ Elemental Composition ]  
 Date : 04-Nov-2021 16:38 Page: 1  
 Data : nishino2638  
 Sample: TR-2g/Nishino  
 Note : Acetone+NBA  
 Inlet : Direct Ion Mode : FAB+  
 RT : 5.50 min Scan# : (20,26)  
 Elements : C 100/0, H 100/0, O 3/1, N 5/3, S 2/0  
 Mass Tolerance : 20ppm, 10mmu if m/z < 500, 20mmu if m/z > 1000  
 Unsaturation (U.S.) : -0.5 - 50.0

| Observed m/z | Int% | Err [ppm / mmu] | U.S. | Composition           |
|--------------|------|-----------------|------|-----------------------|
| 426.1159     | 32.4 | -19.6 / -8.3    | 22.5 | C 28 H 16 O 2 N 3     |
|              |      | +9.9 / +4.2     | 23.0 | C 27 H 14 O 2 N 4     |
|              |      | +2.0 / +0.9     | 19.0 | C 24 H 18 O 2 N 4 S   |
|              |      | -5.9 / -2.5     | 15.0 | C 21 H 22 O 2 N 4 S 2 |
| 427.1223     | 27.4 | -23.0 / -9.8    | 22.0 | C 28 H 17 O 2 N 3     |
|              |      | +6.4 / +2.8     | 22.5 | C 27 H 15 O 2 N 4     |
|              |      | -1.5 / -0.6     | 18.5 | C 24 H 19 O 2 N 4 S   |
|              |      | -9.3 / -4.0     | 14.5 | C 21 H 23 O 2 N 4 S 2 |
|              |      | +20.1 / +8.6    | 15.0 | C 20 H 21 O 2 N 5 S 2 |

Fig. S57. IR spectrum of 2q.

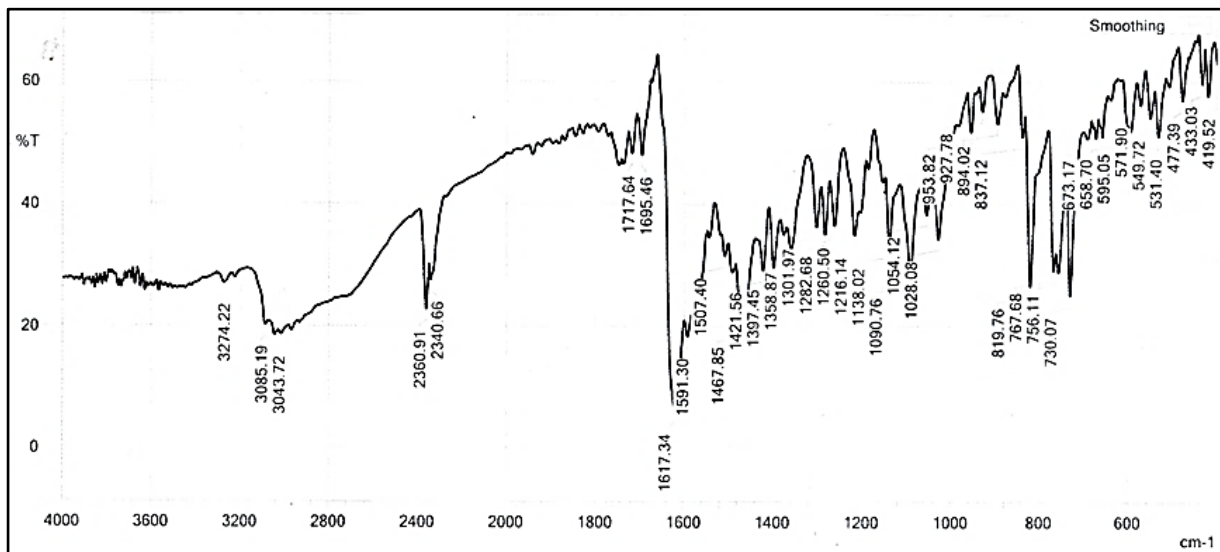

**Fig. S58.** IR spectrum of **2r**.

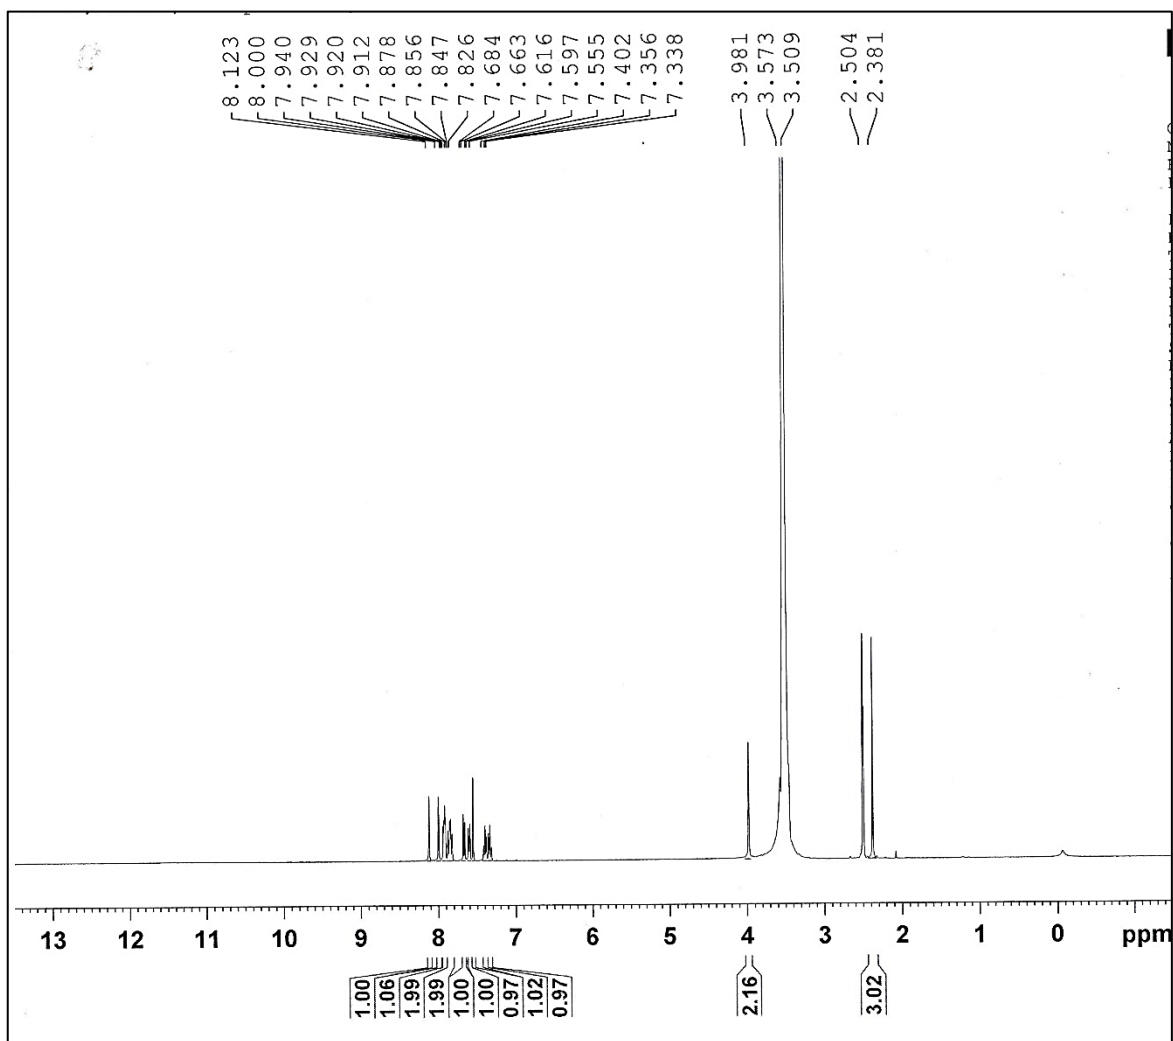

Fig. S59. <sup>1</sup>H NMR spectrum of 2r.

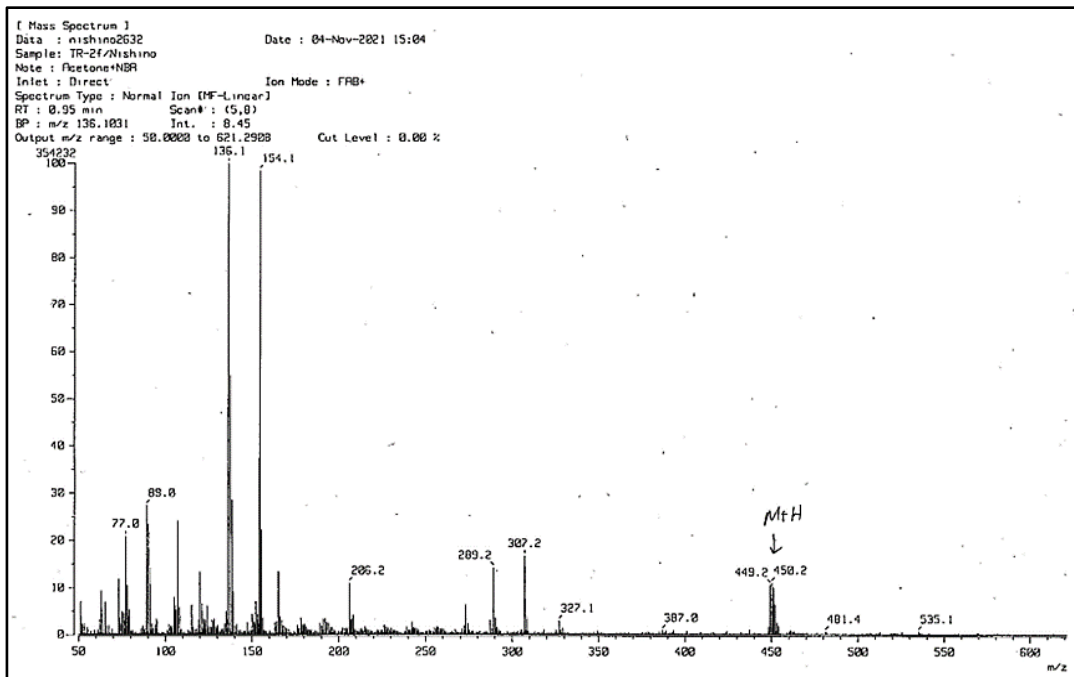

[ Elemental Composition ]  
 Date : 04-Nov-2021 16:17 Page: 1  
 Data : nishino2635  
 Sample: TR-2f/Nishino  
 Note : Acetone+NBA  
 Inlet : Direct Ion Mode : FAB+  
 RT : 1.63 min Scan# : (5,10)  
 Elements : C 100/0, H 100/0, N 4/2, Cl 3/1, S 2/0  
 Mass Tolerance : 20ppm, 10mmu if m/z < 500, 20mmu if m/z > 1000  
 Unsaturation (U.S.) : -0.5 - 50.0

| Observed m/z | Int%  | Err [ppm / mmu]        | U.S. | Composition            |
|--------------|-------|------------------------|------|------------------------|
| 449.0556     | 100.0 | -8.4 / -3.8            | 26.5 | C 29 H 10 N 4 Cl       |
|              |       | -12.5 / -5.6           | 21.5 | C 28 H 15 N 2 Cl 2     |
|              |       | +15.5 / +7.0           | 22.0 | C 27 H 13 N 3 Cl 2     |
|              |       | -15.9 / -7.1           | 22.5 | C 26 H 14 N 4 Cl S     |
|              |       | -20.0 / -9.0           | 17.5 | C 25 H 19 N 2 Cl 2 S   |
|              |       | +8.0 / +3.6            | 18.0 | C 24 H 17 N 3 Cl 2 S   |
| 450.0599     | 83.6  | +0.5 / +0.2            | 14.0 | C 21 H 21 N 3 Cl 2 S 2 |
|              |       | -16.2 / -7.3           | 26.0 | C 29 H 11 N 4 Cl       |
|              |       | -20.3 / -9.1           | 21.0 | C 28 H 16 N 2 Cl 2     |
|              |       | +7.7 / +3.5            | 21.5 | C 27 H 14 N 3 Cl 2     |
|              |       | +0.2 / +0.1            | 17.5 | C 24 H 18 N 3 Cl 2 S   |
|              |       | -7.3 / -3.3            | 13.5 | C 21 H 22 N 3 Cl 2 S 2 |
|              |       | +20.6 / +9.3           | 14.0 | C 20 H 20 N 4 Cl 2 S 2 |
| +16.6 / +7.5 | 9.0   | C 19 H 25 N 2 Cl 3 S 2 |      |                        |

Fig. S60. HRMS spectrum of 2r.

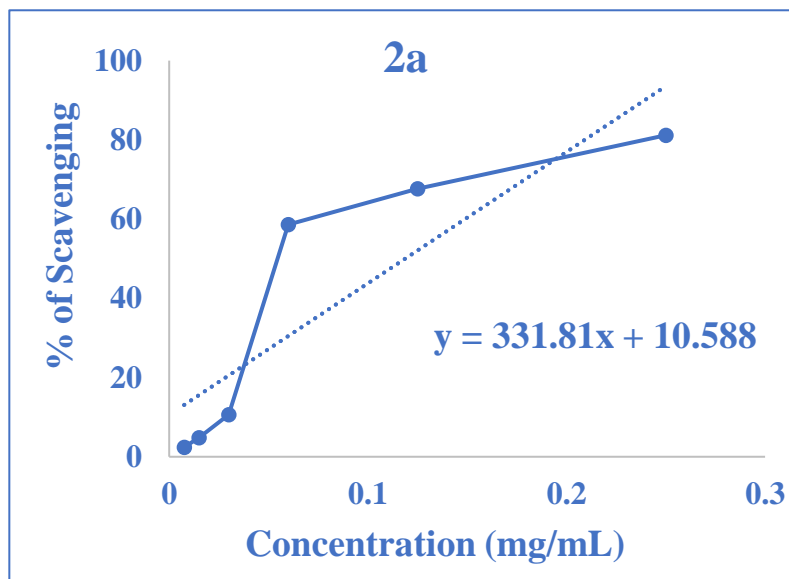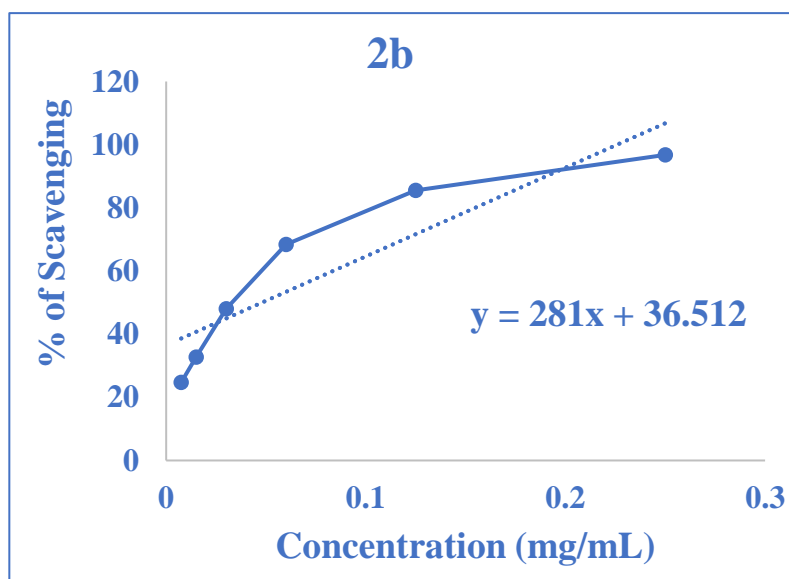

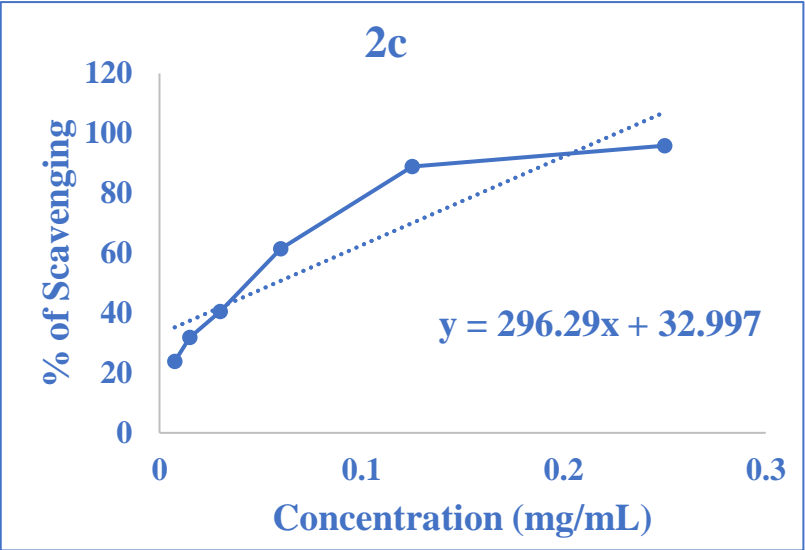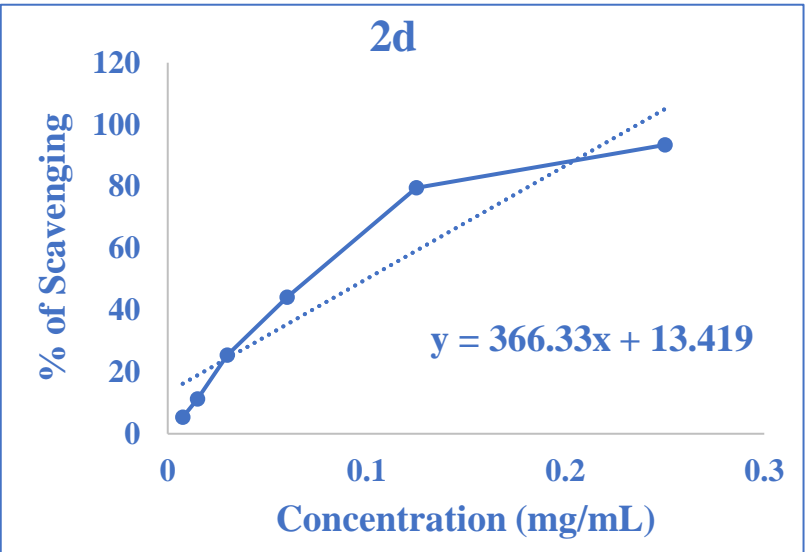

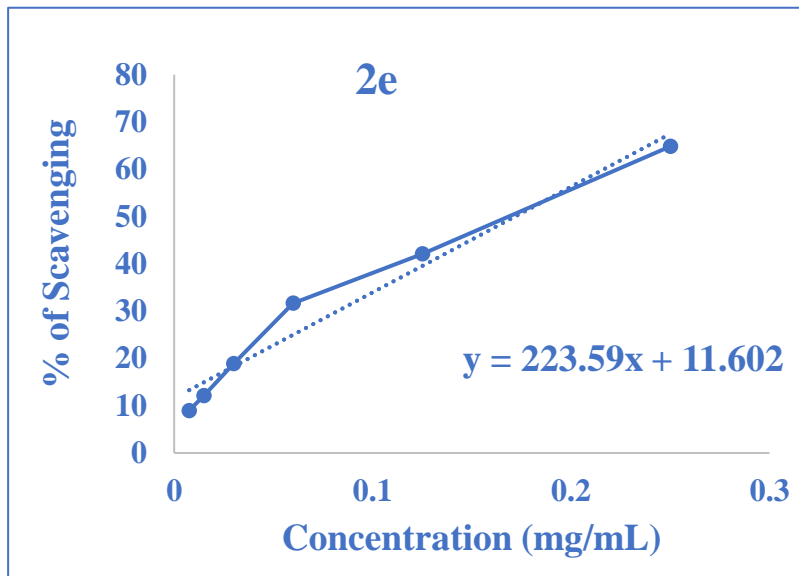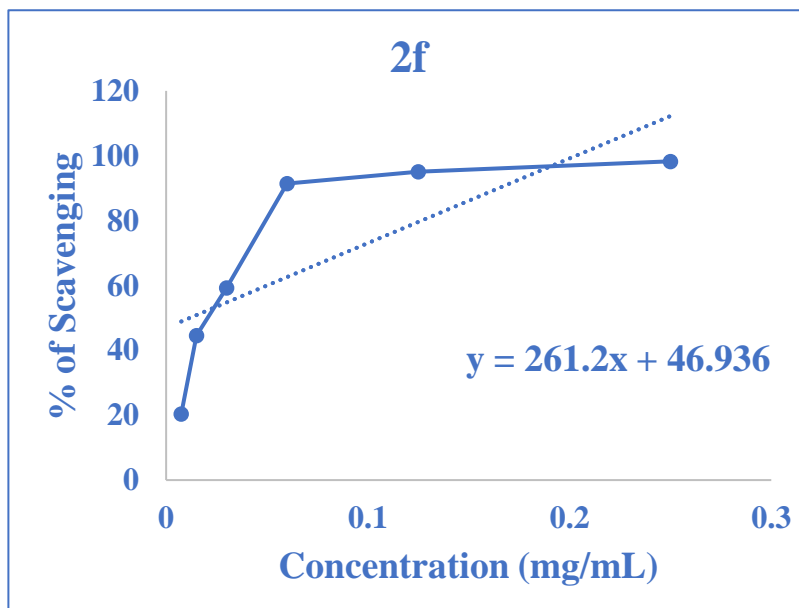



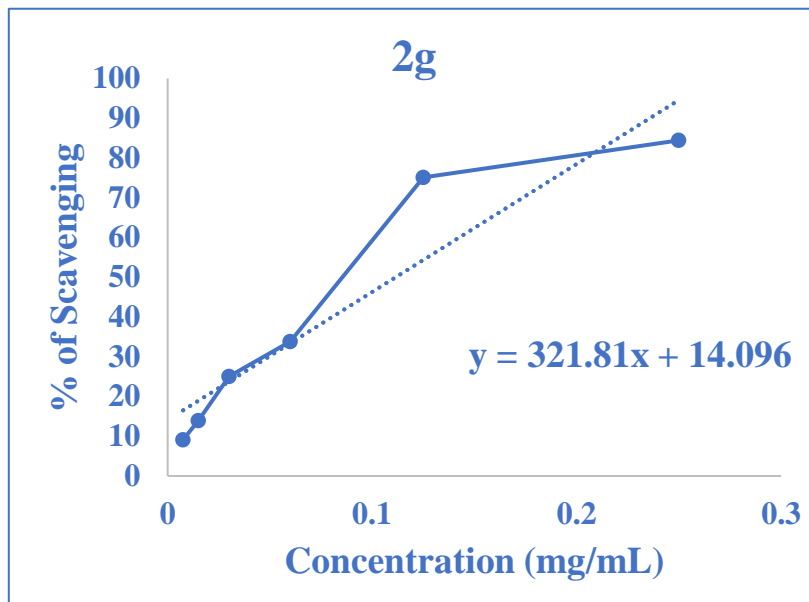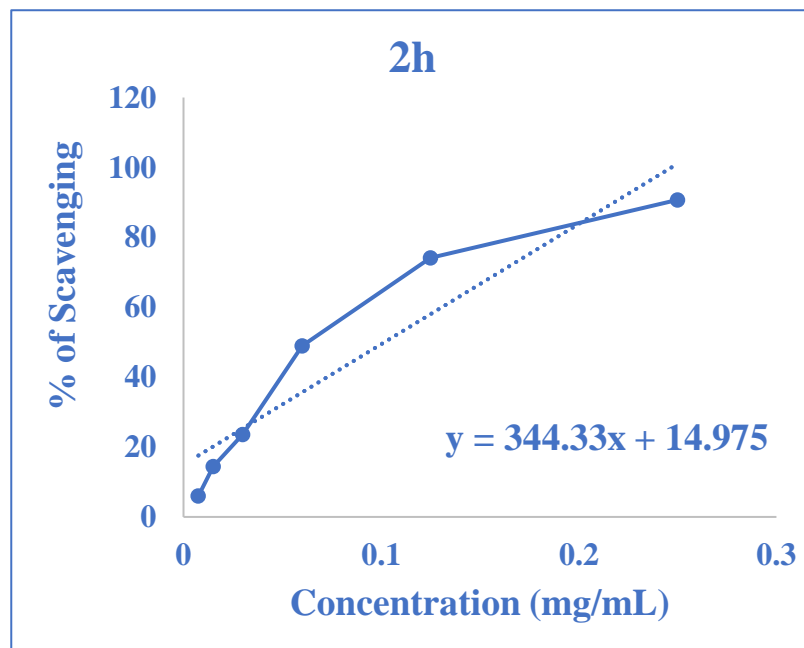

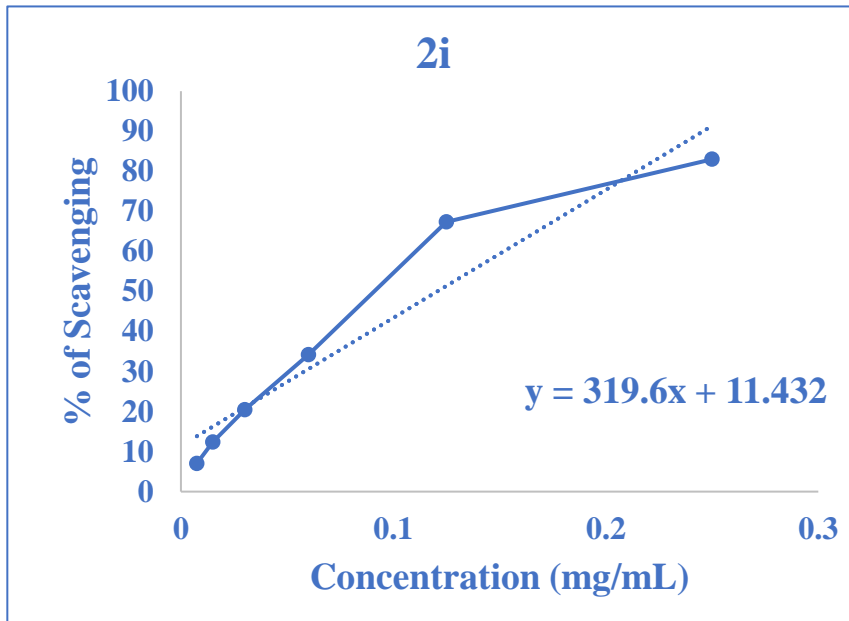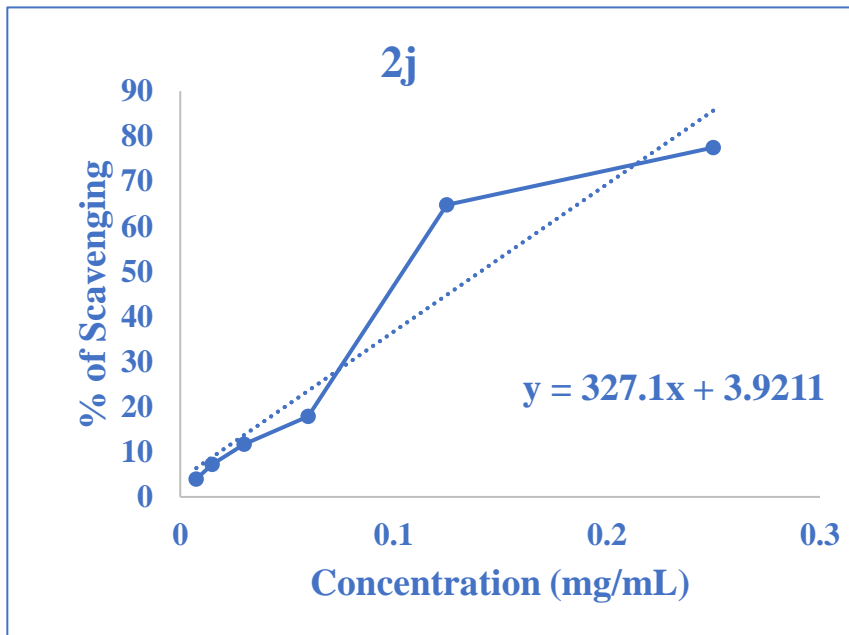

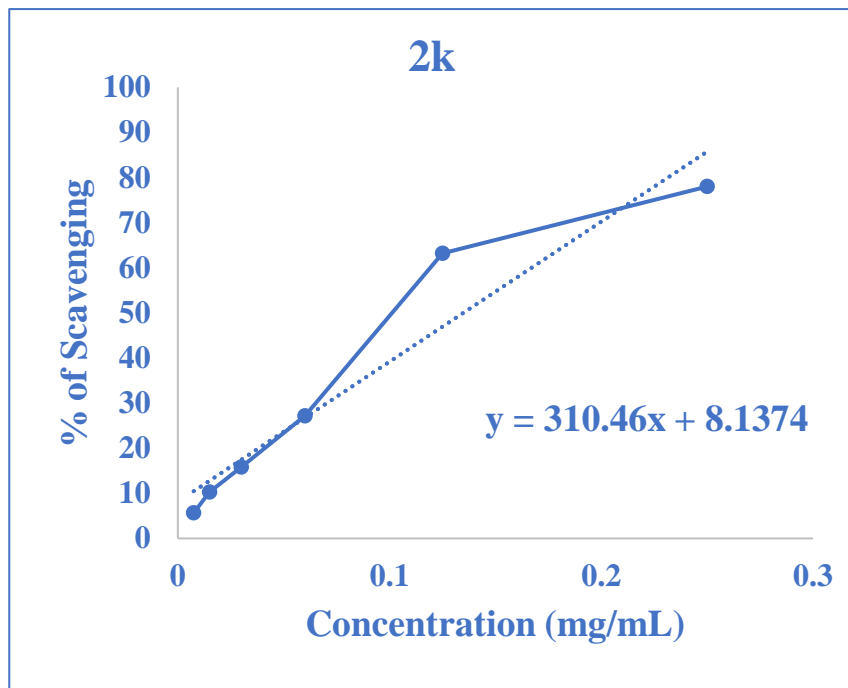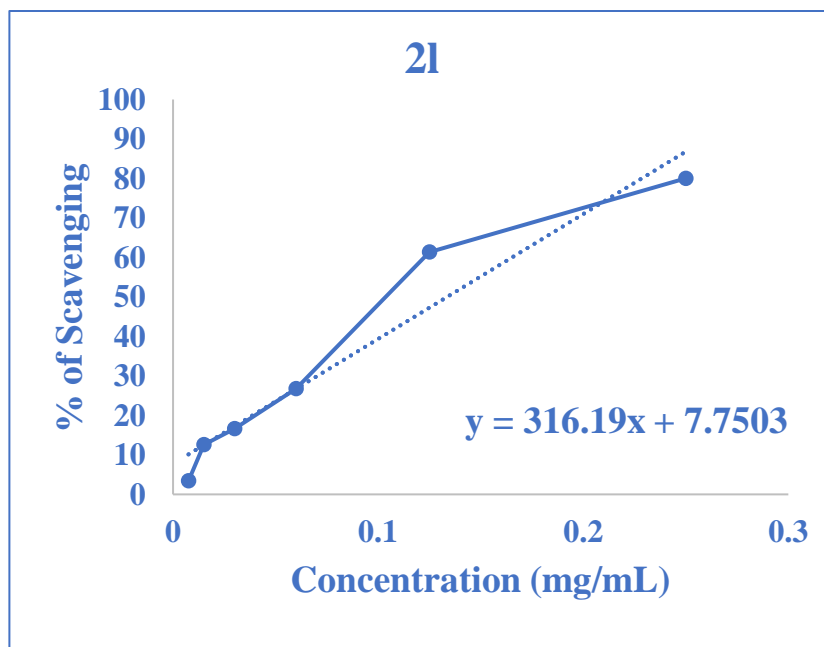

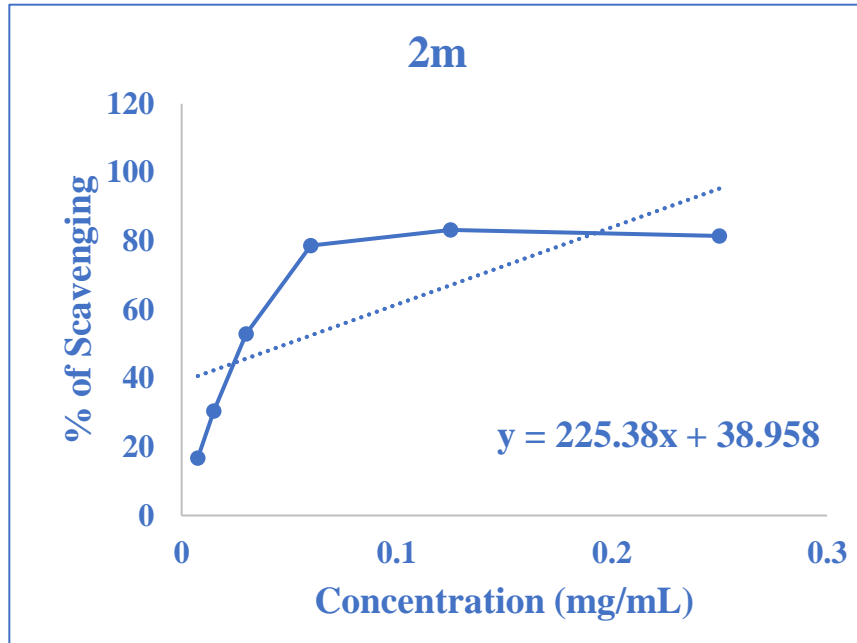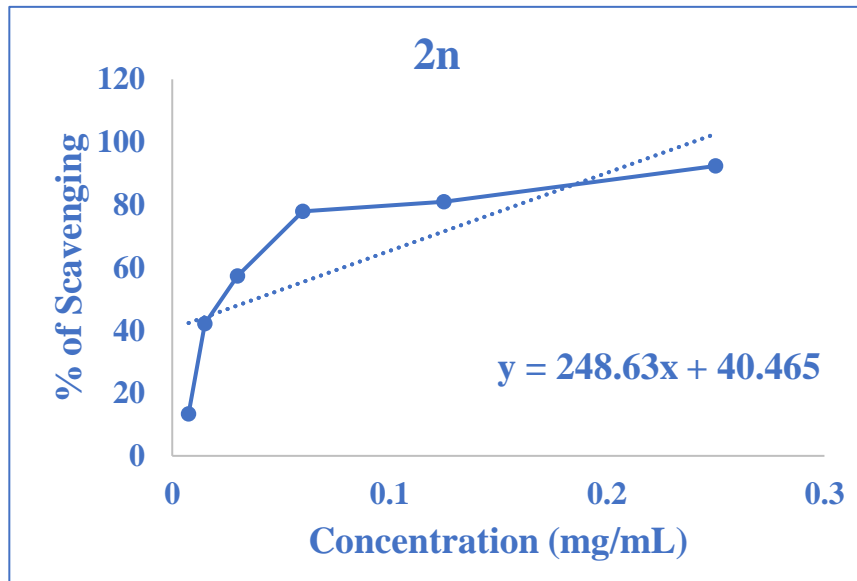

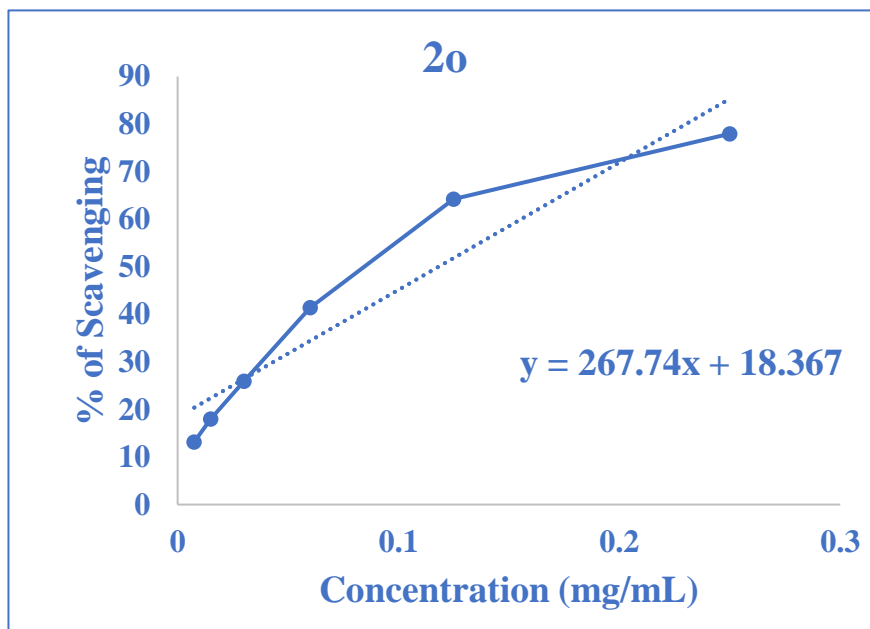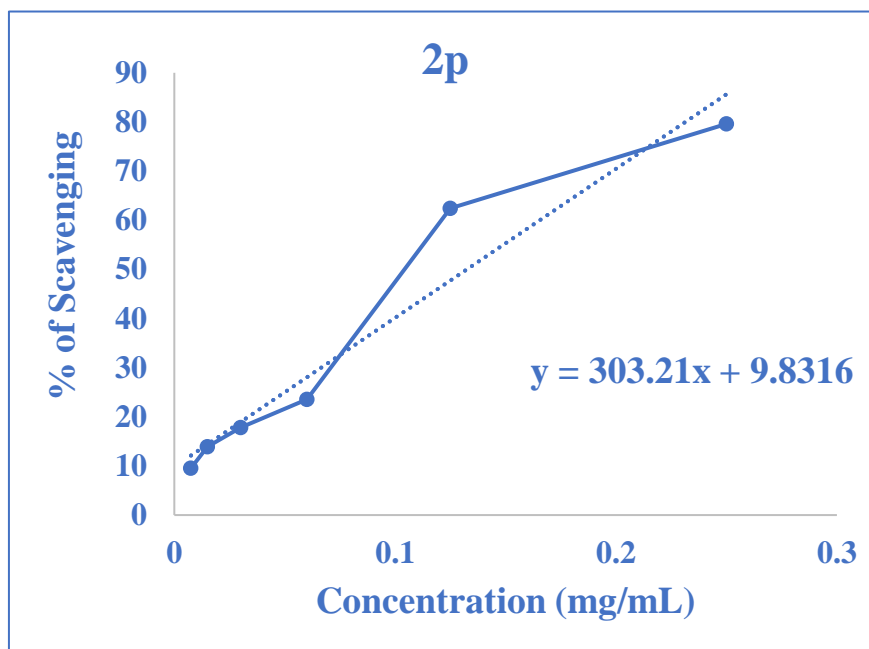

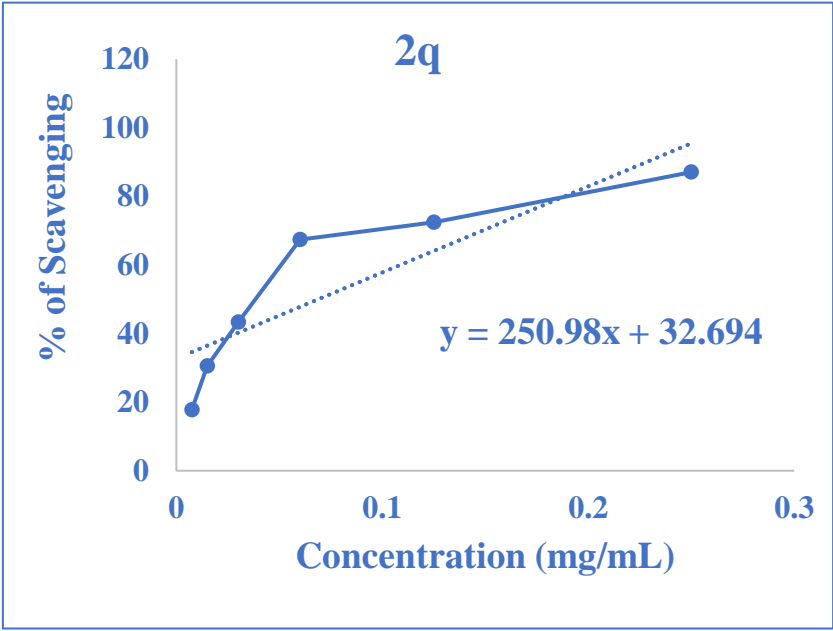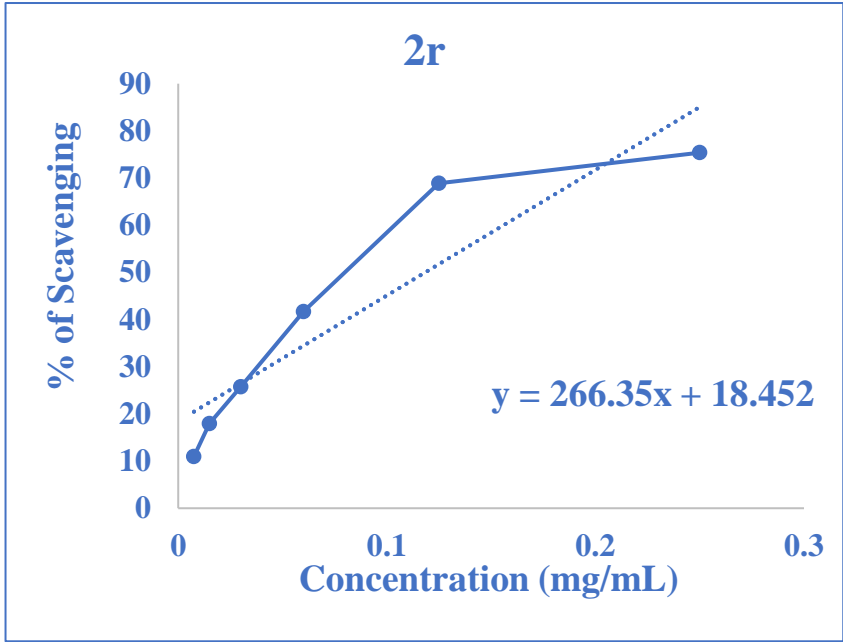

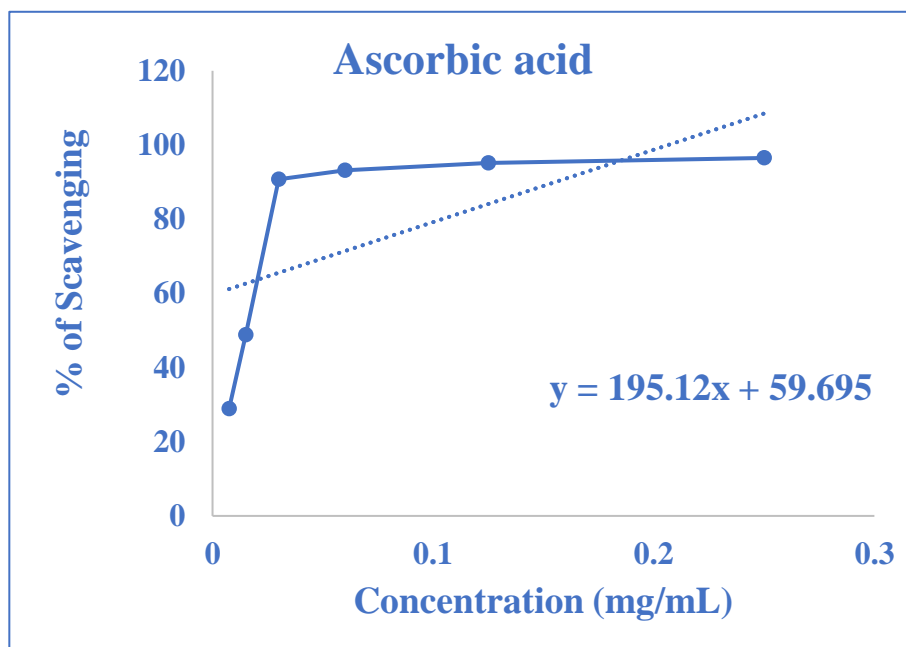

**Fig. S61.** Concentration-inhibition curves of synthesized compounds **2a-2r** and ascorbic acid.
